# Supplementary figures and images for: Modelling bionano interactions and potential health risks for environmental nanoplastics: the case of functionalized polystyrene
Source: Royal Society of Chemistry journal article supplement (doi:10.1039/d5en00784d), 2026-01-01

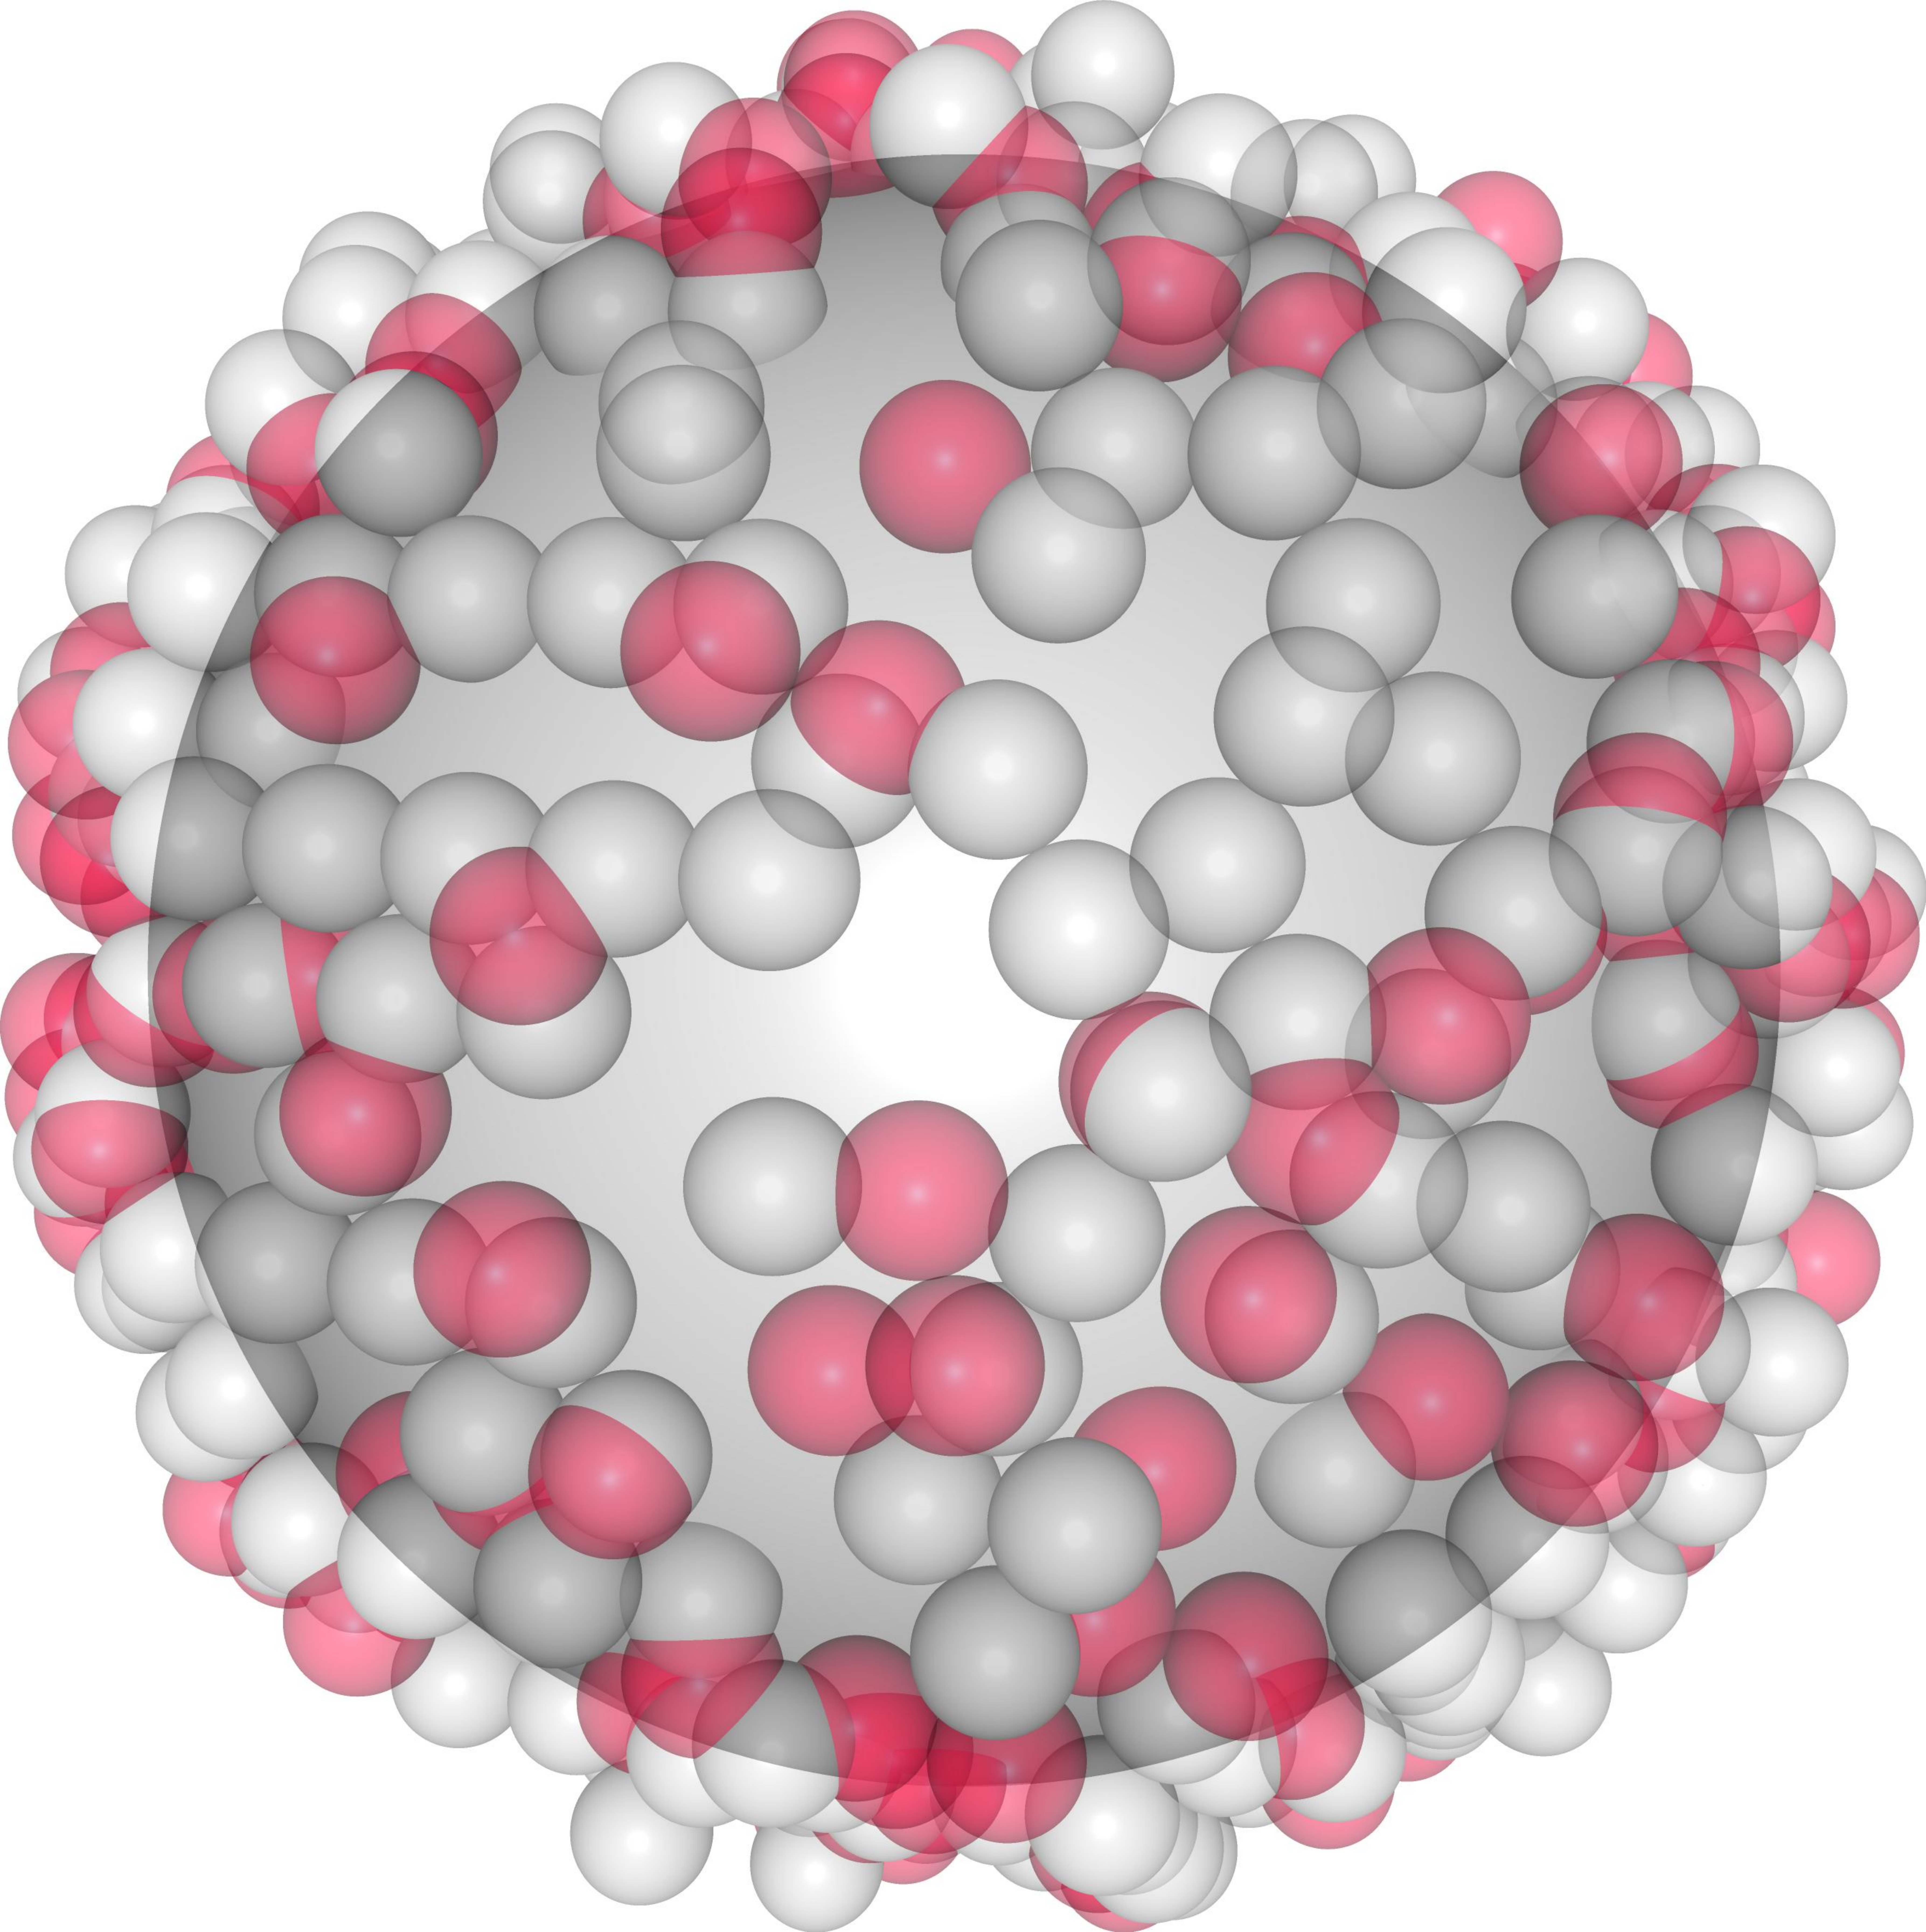

Supplement: d5en00784d1.zip [file PS-4.62_COOHH-rasp-0.38_zp--0.048_3-beads_198.pdf › fig_supp/PS-4.62_COOHH-rasp-0.38_zp--0.048_3-beads_198.pdf]

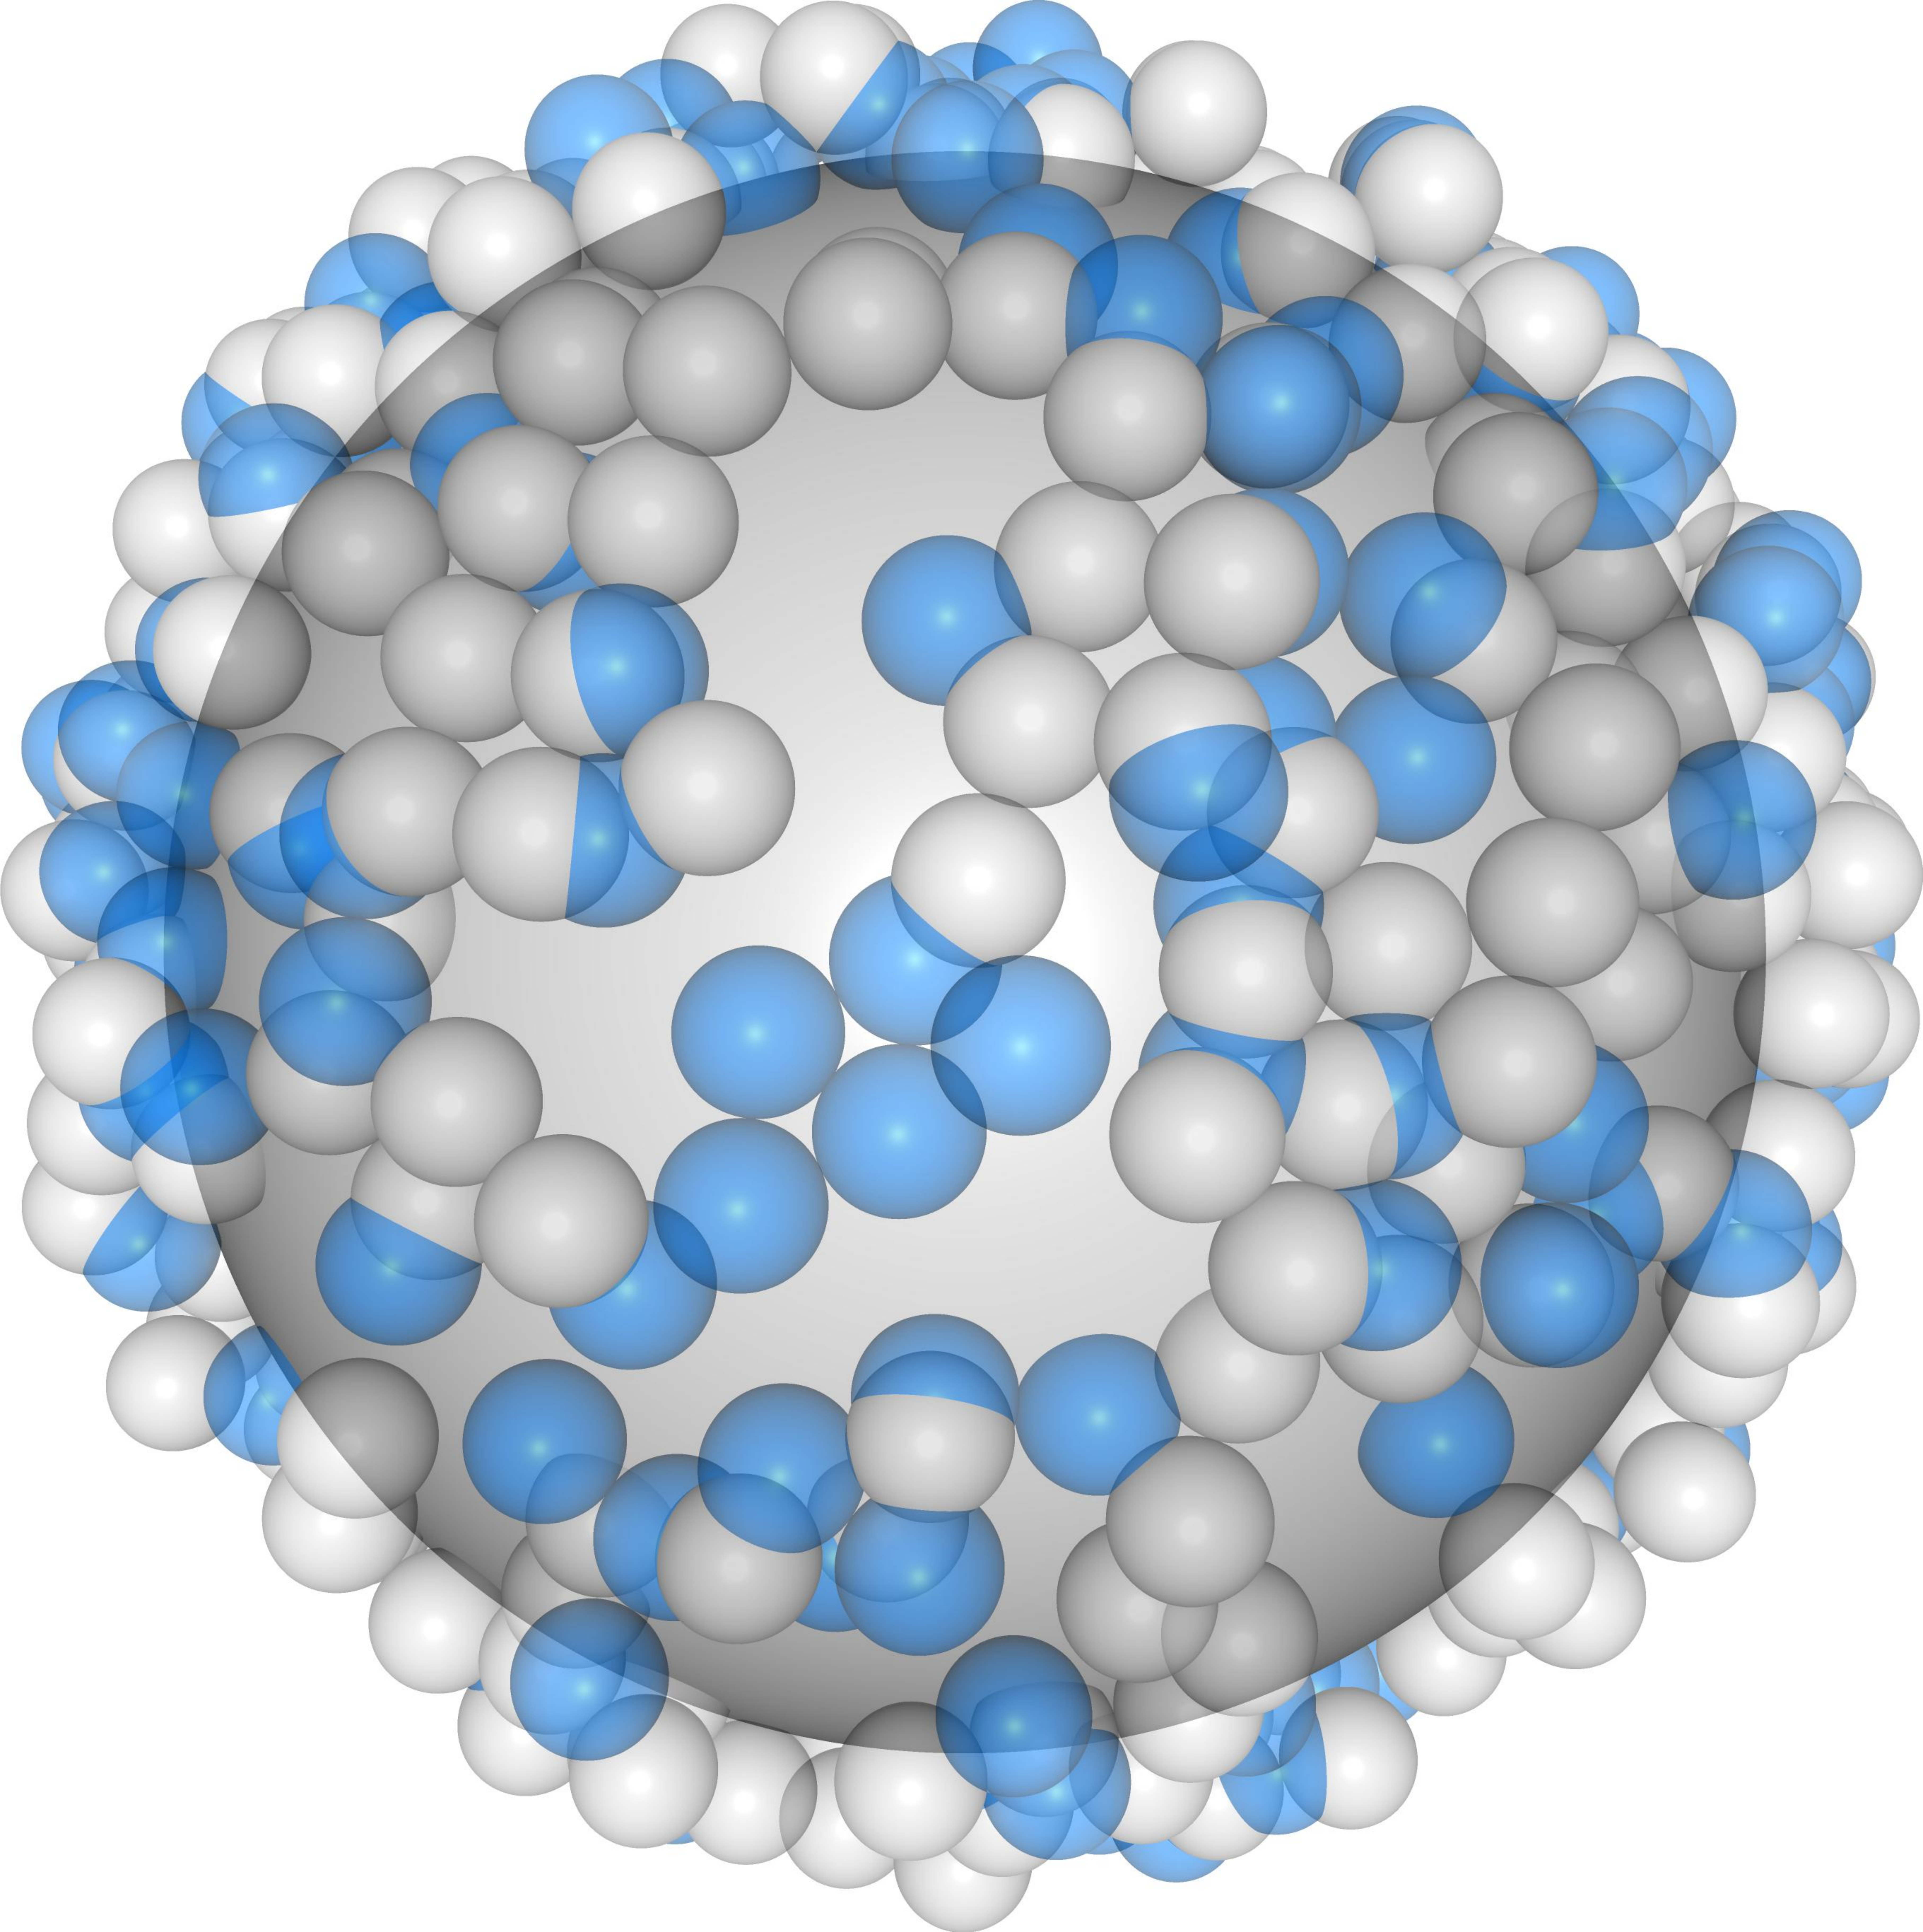

Supplement: d5en00784d1.zip [file PS-4.62_NH2-rasp-0.38_zp-0.048_5-beads_198.pdf › fig_supp/PS-4.62_NH2-rasp-0.38_zp-0.048_5-beads_198.pdf]

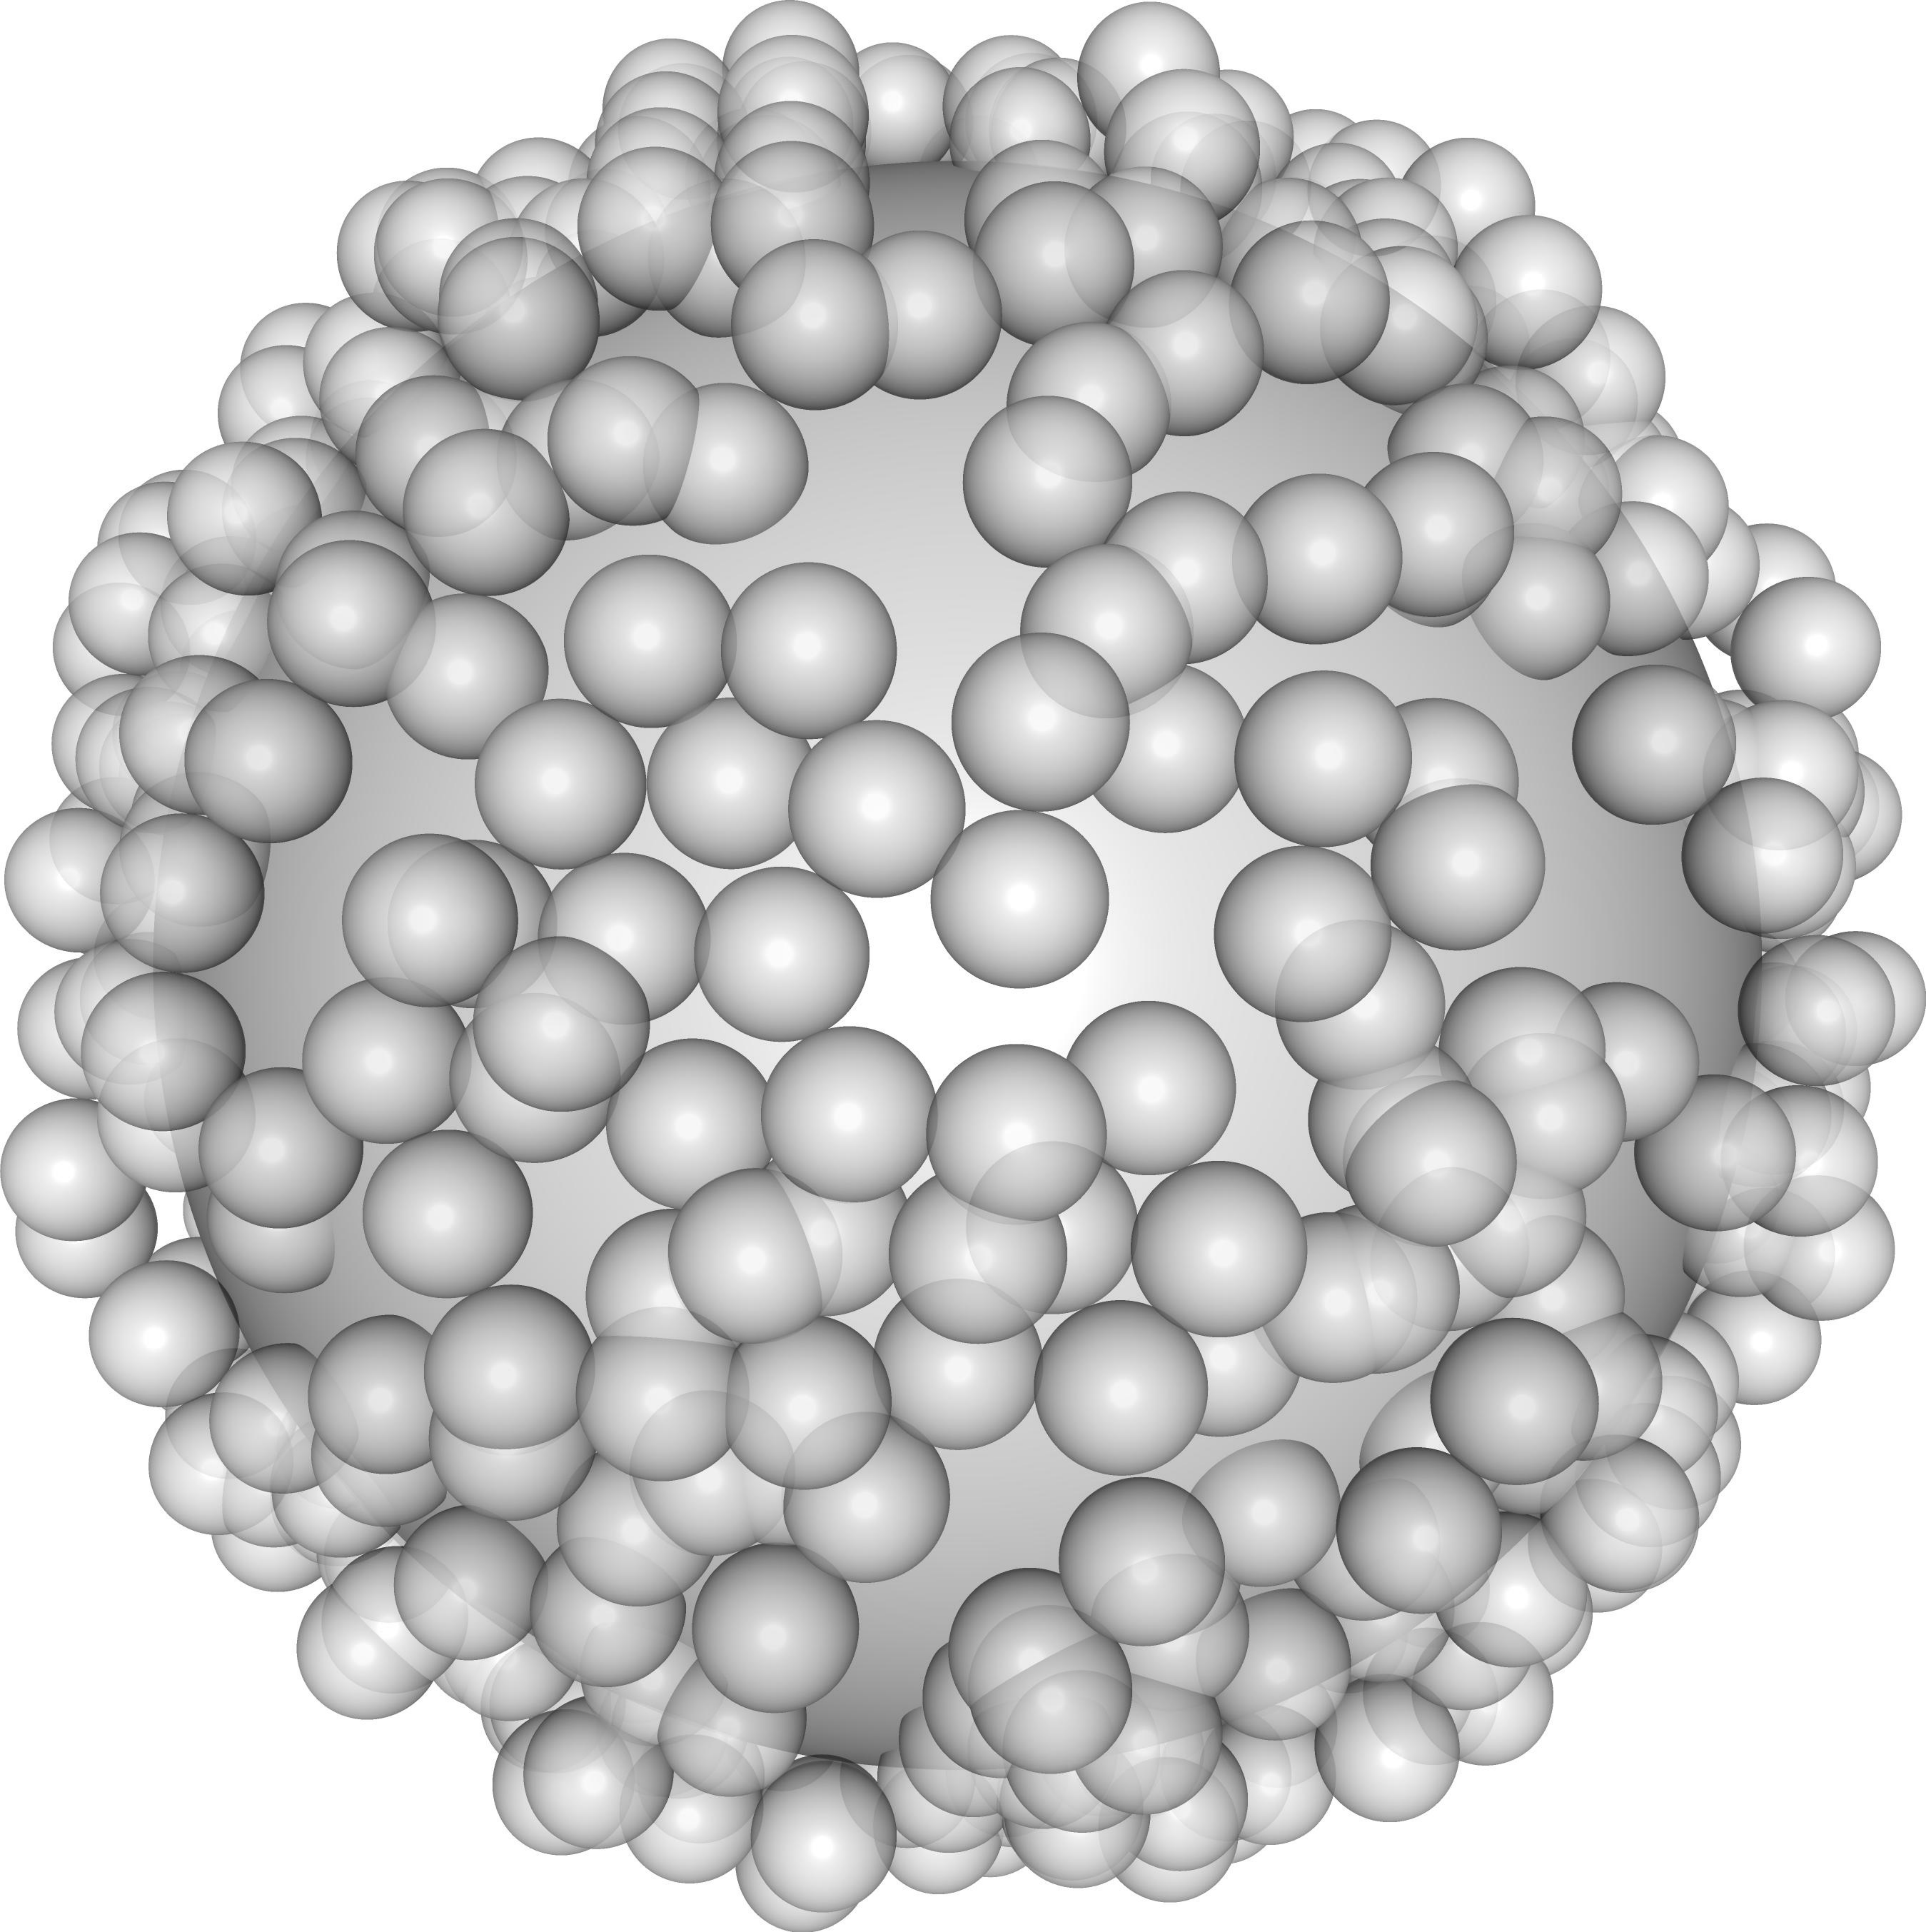

Supplement: d5en00784d1.zip [file PS-4.62_PS-rasp-0.38_zp-0.0_3-beads_0.pdf › fig_supp/PS-4.62_PS-rasp-0.38_zp-0.0_3-beads_0.pdf]

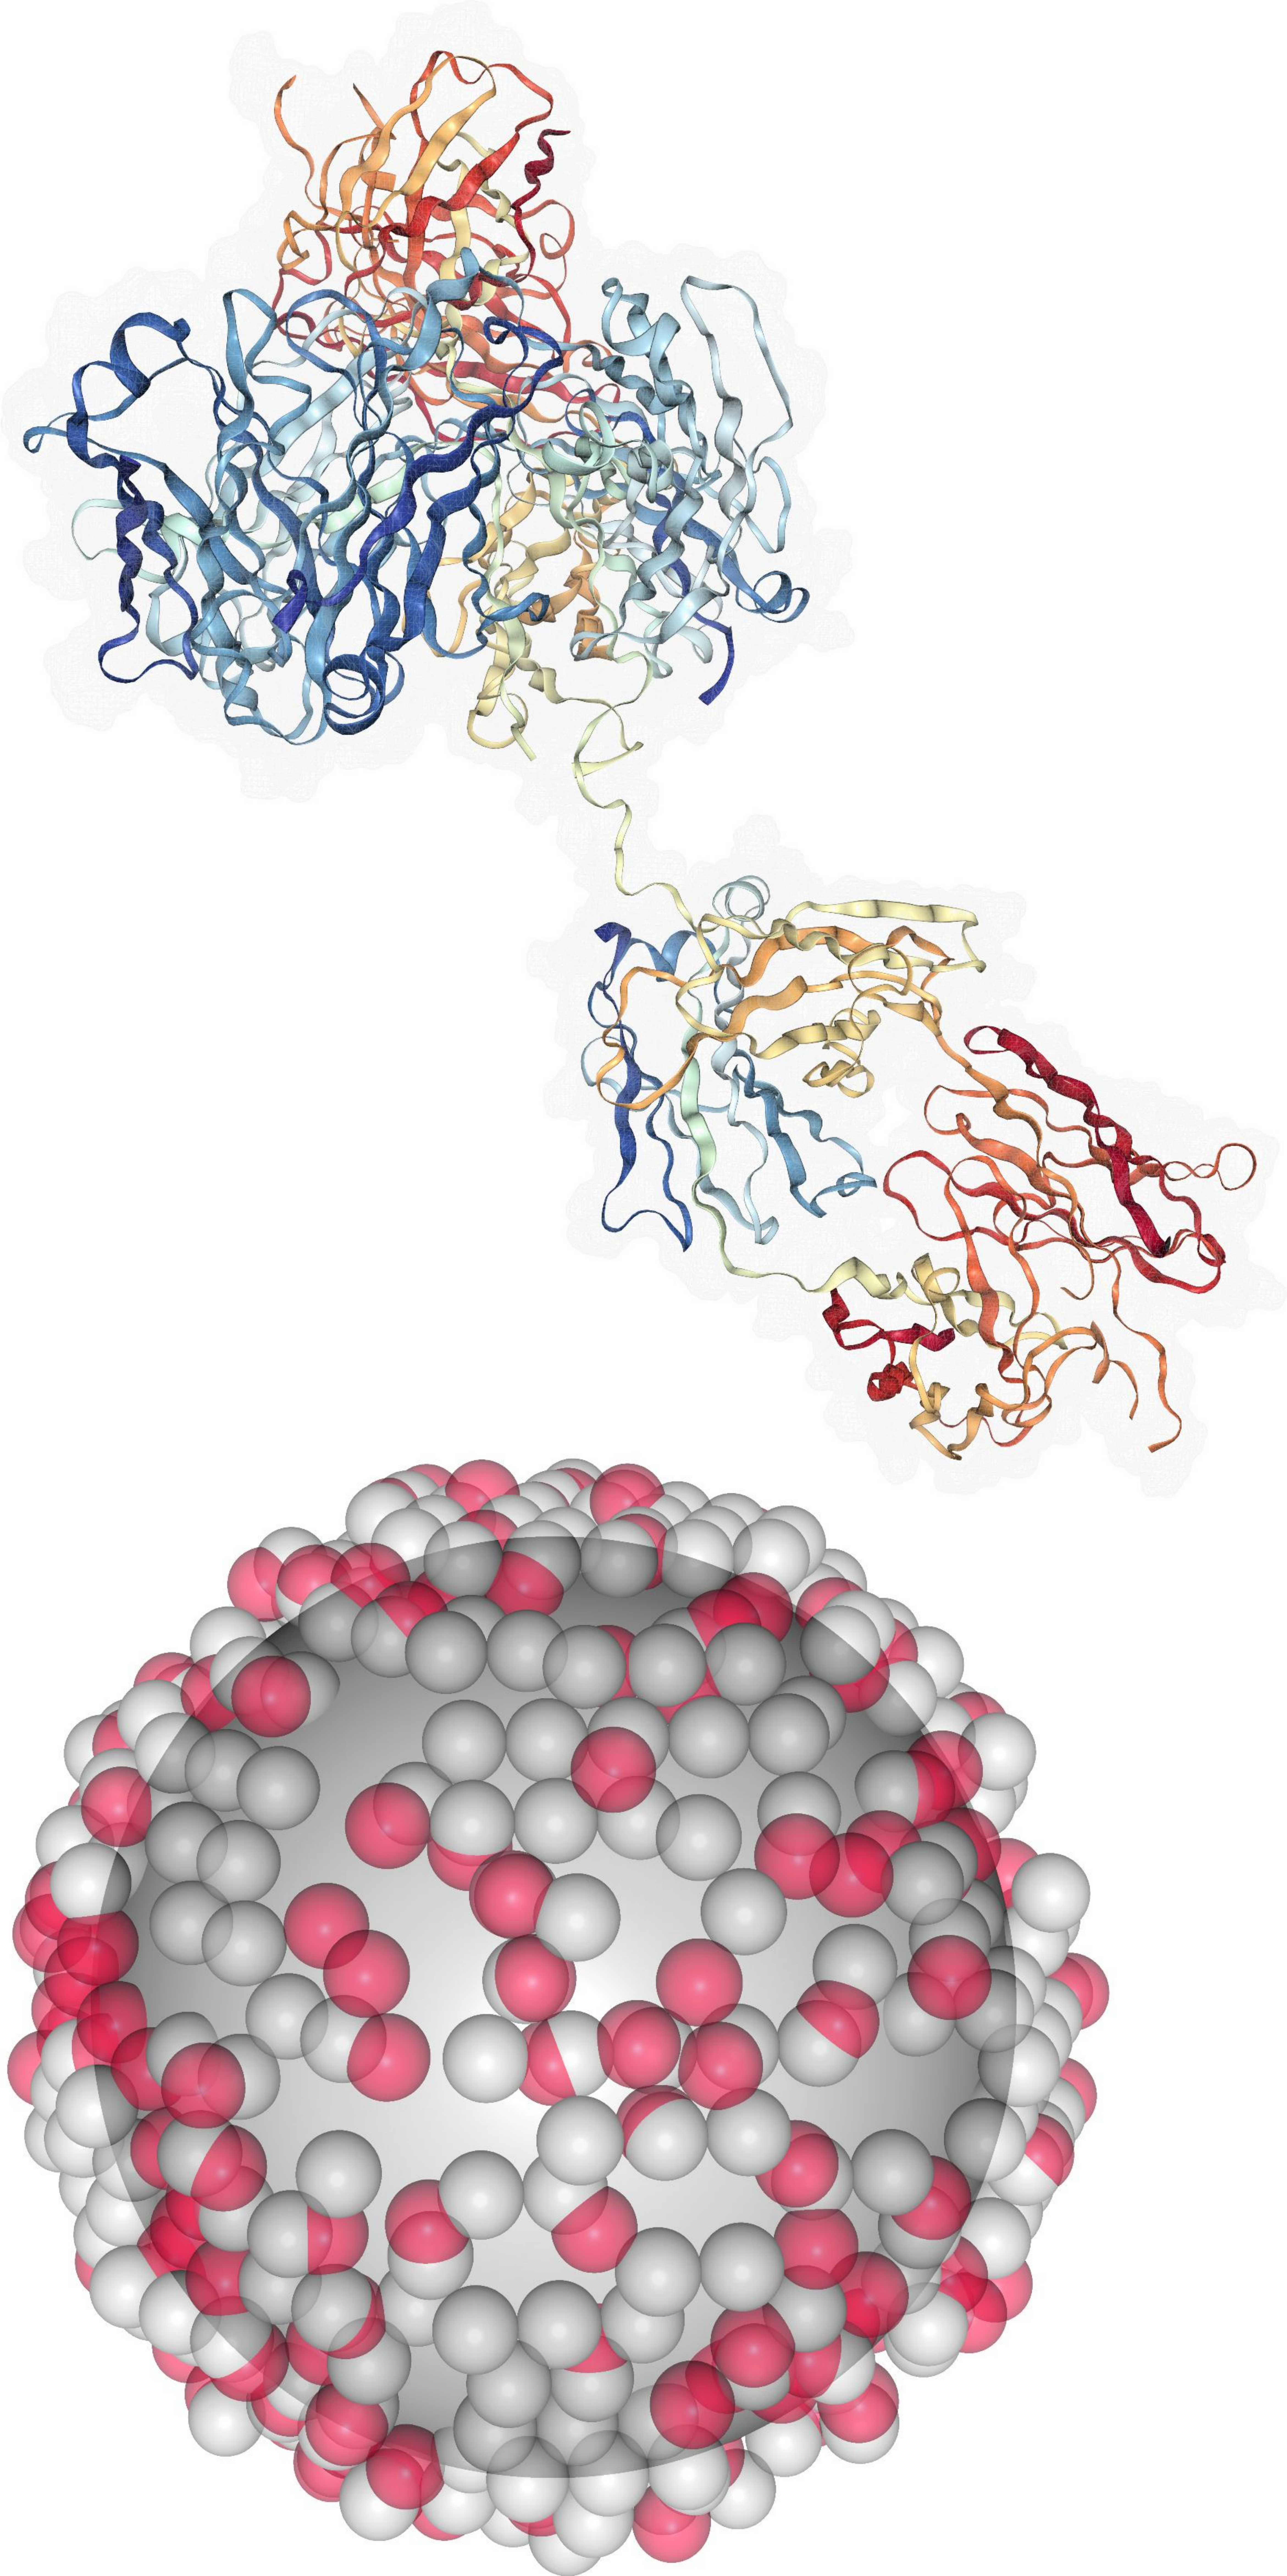

Supplement: d5en00784d1.zip [file pscooh_5nm_1hzh_CG.pdf › fig_supp/complex/pscooh_5nm_1hzh_CG.pdf]

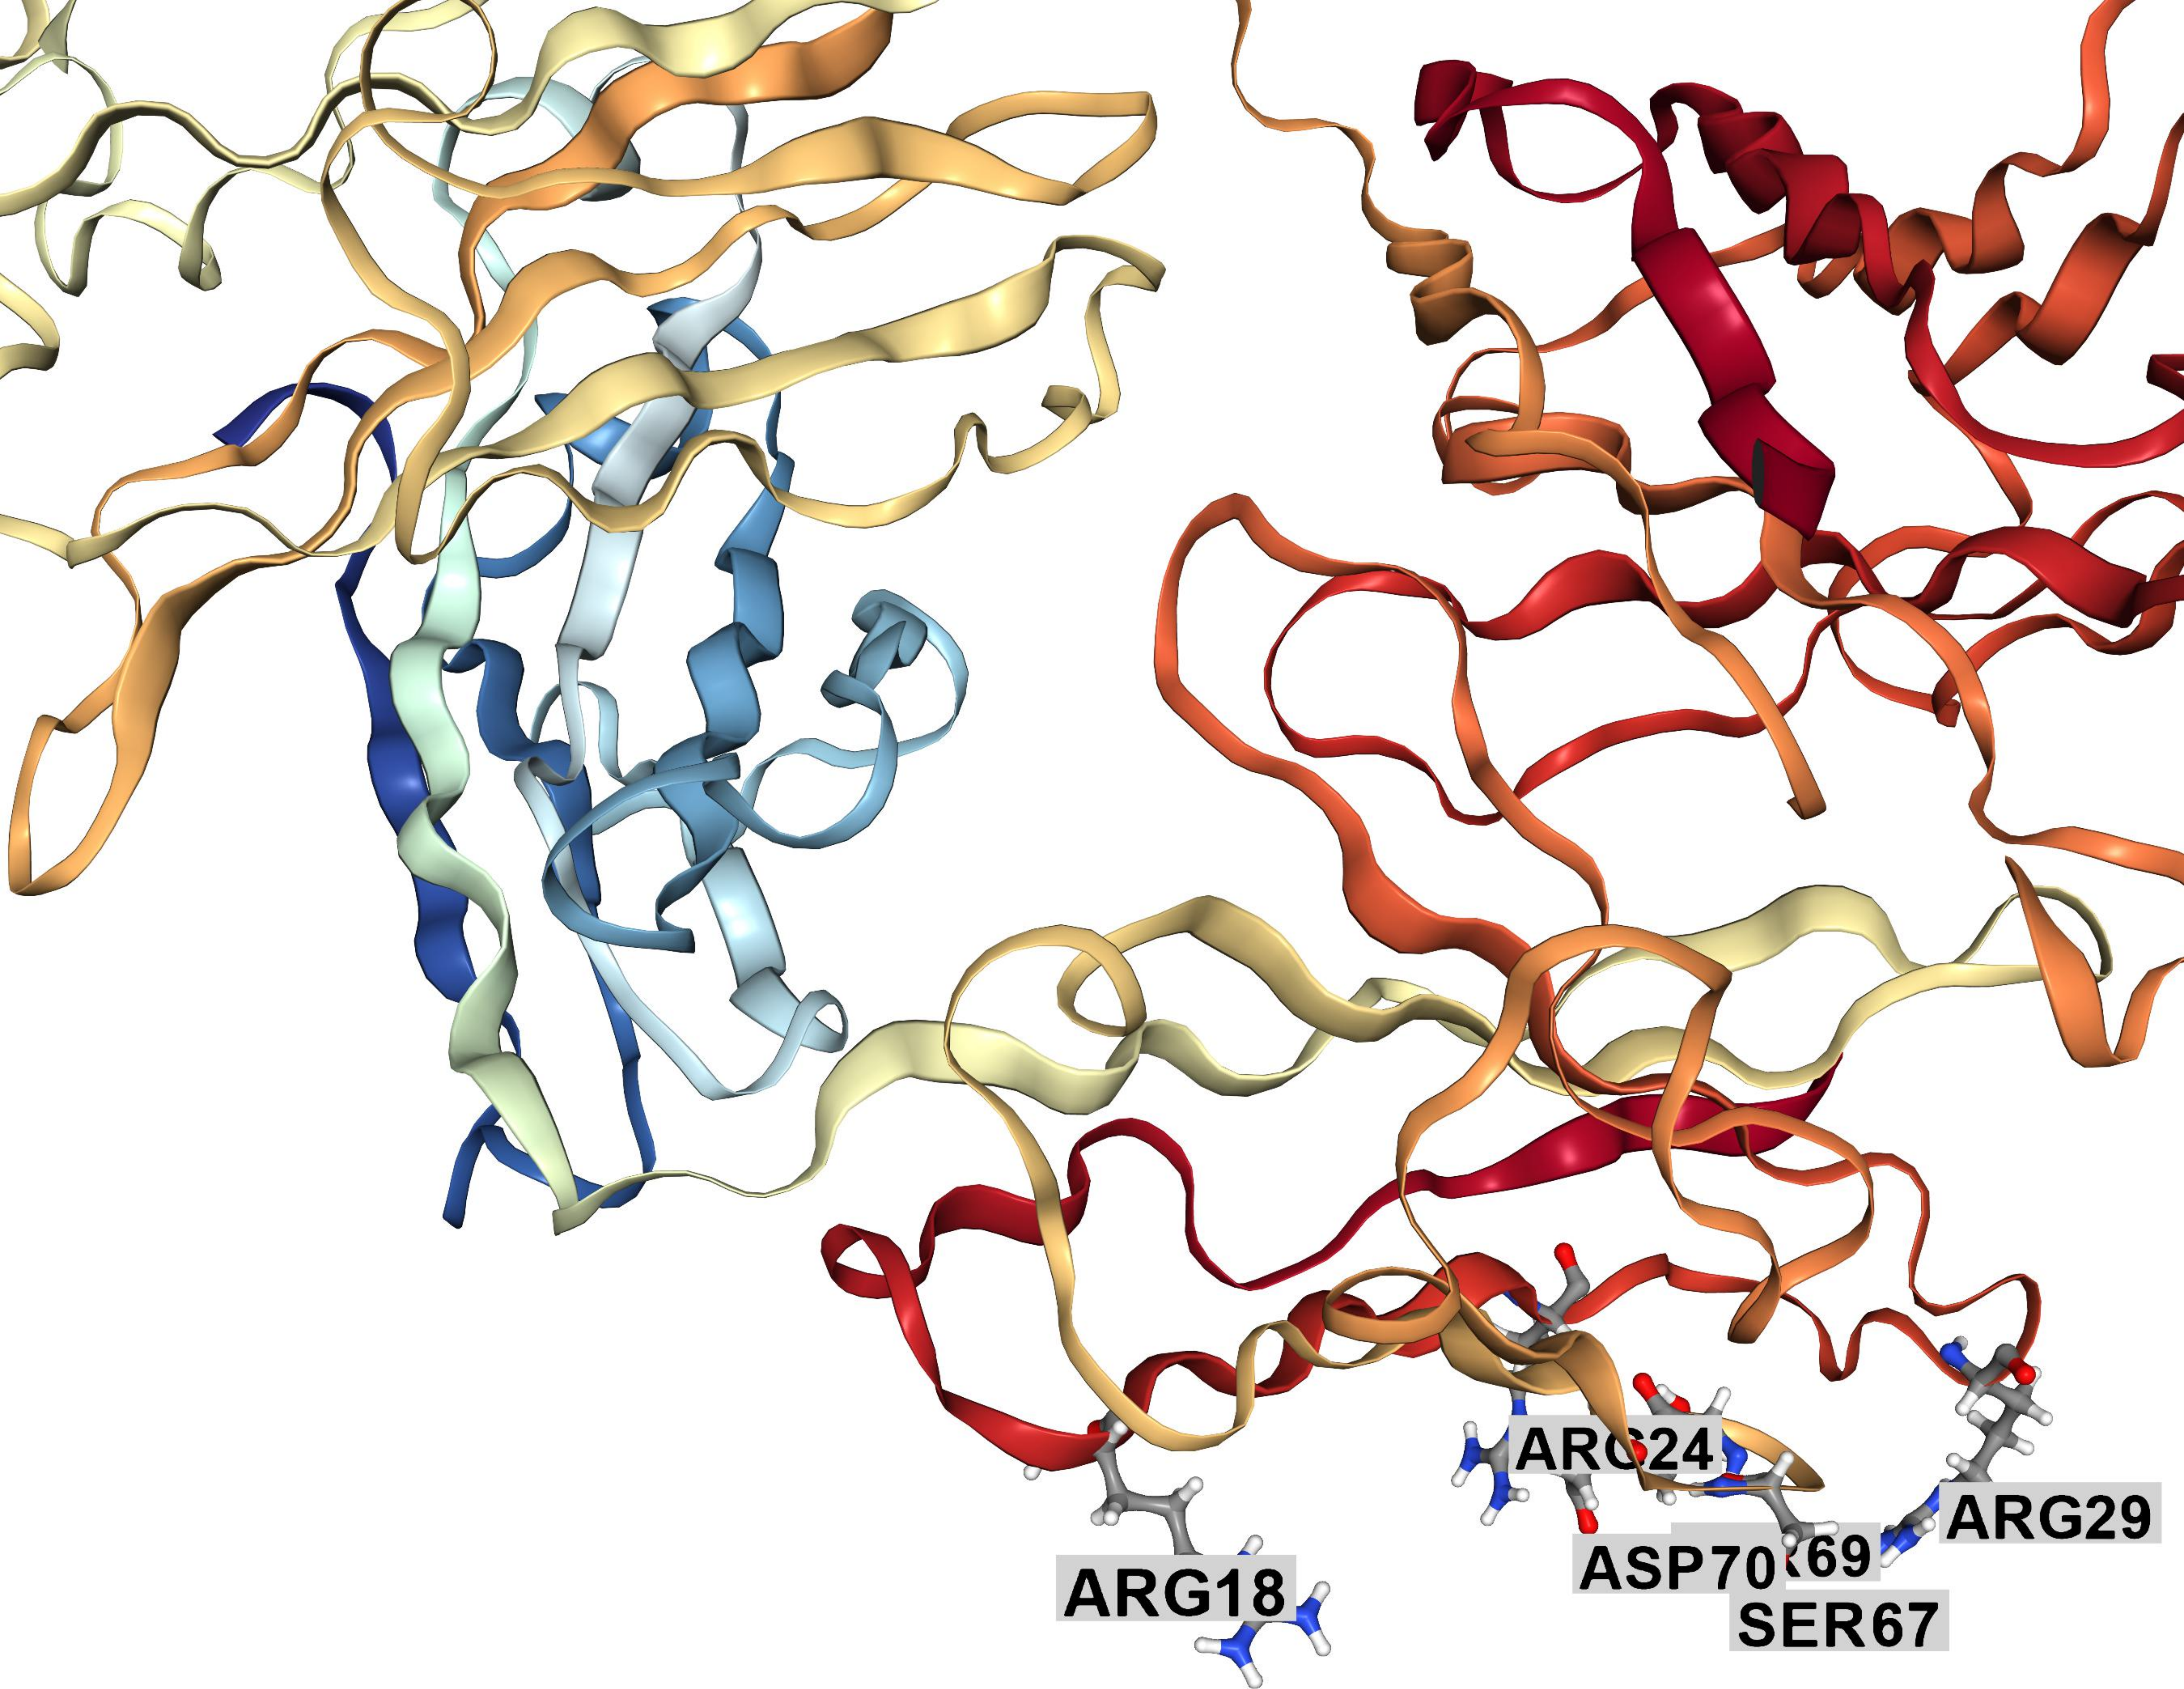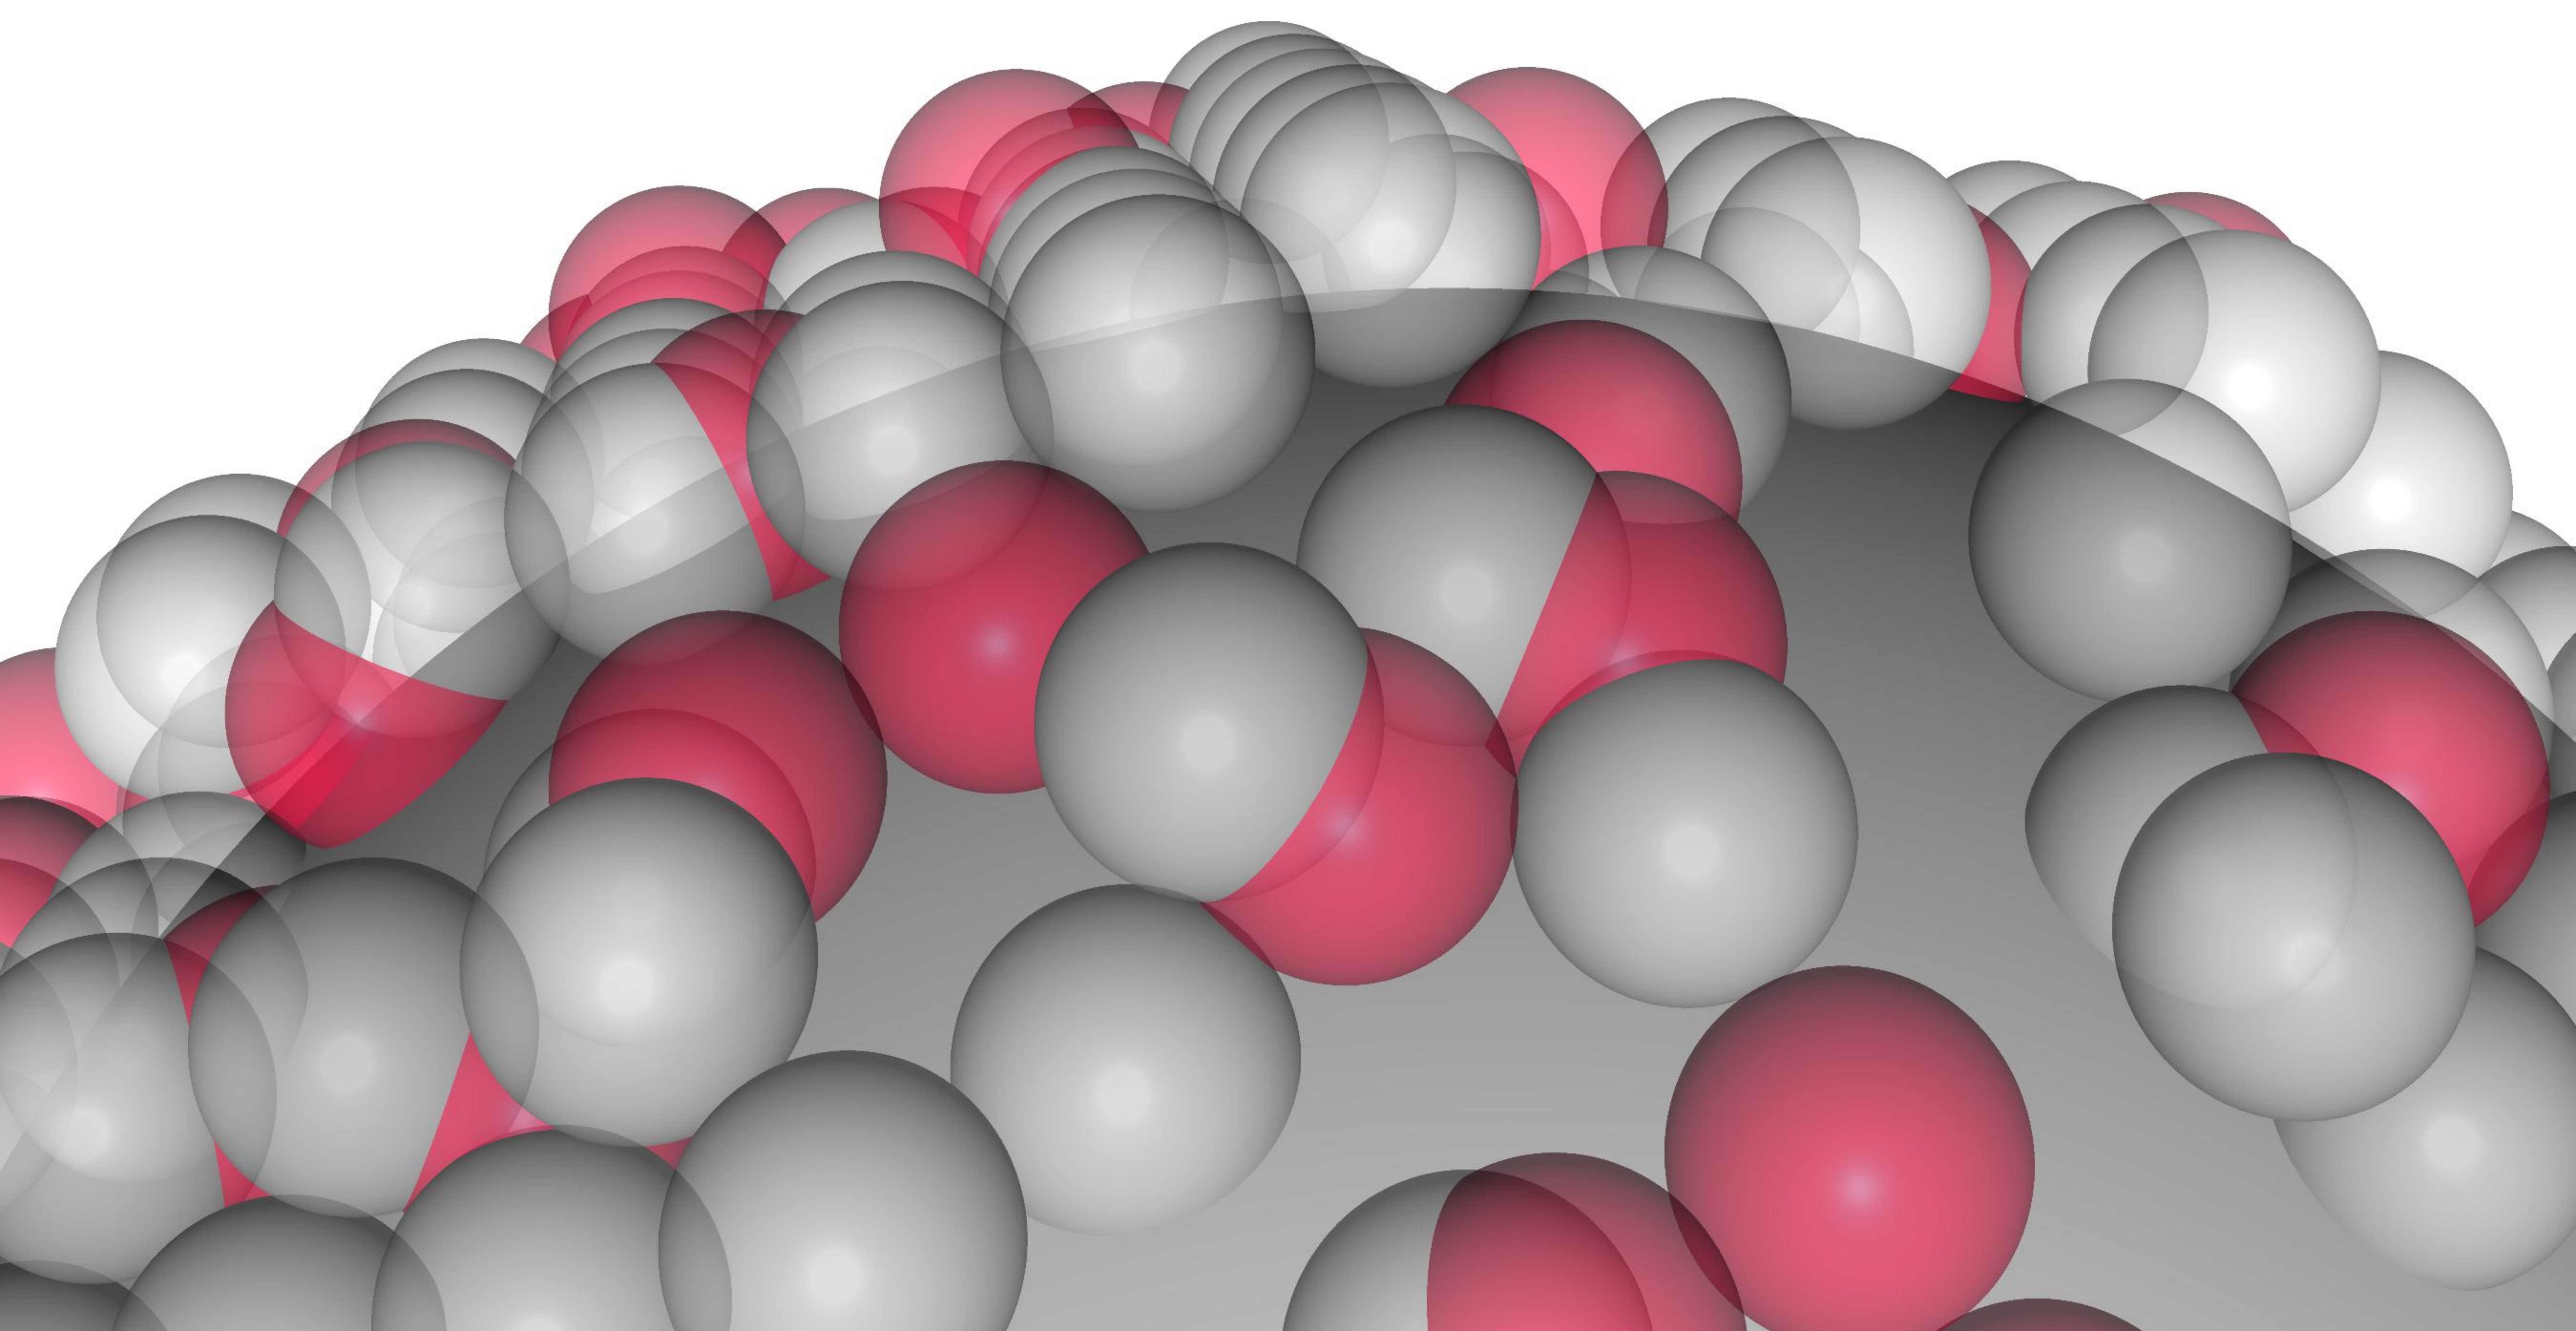

Supplement: d5en00784d1.zip [file pscooh_5nm_1hzh_snap.pdf › fig_supp/complex/pscooh_5nm_1hzh_snap.pdf]

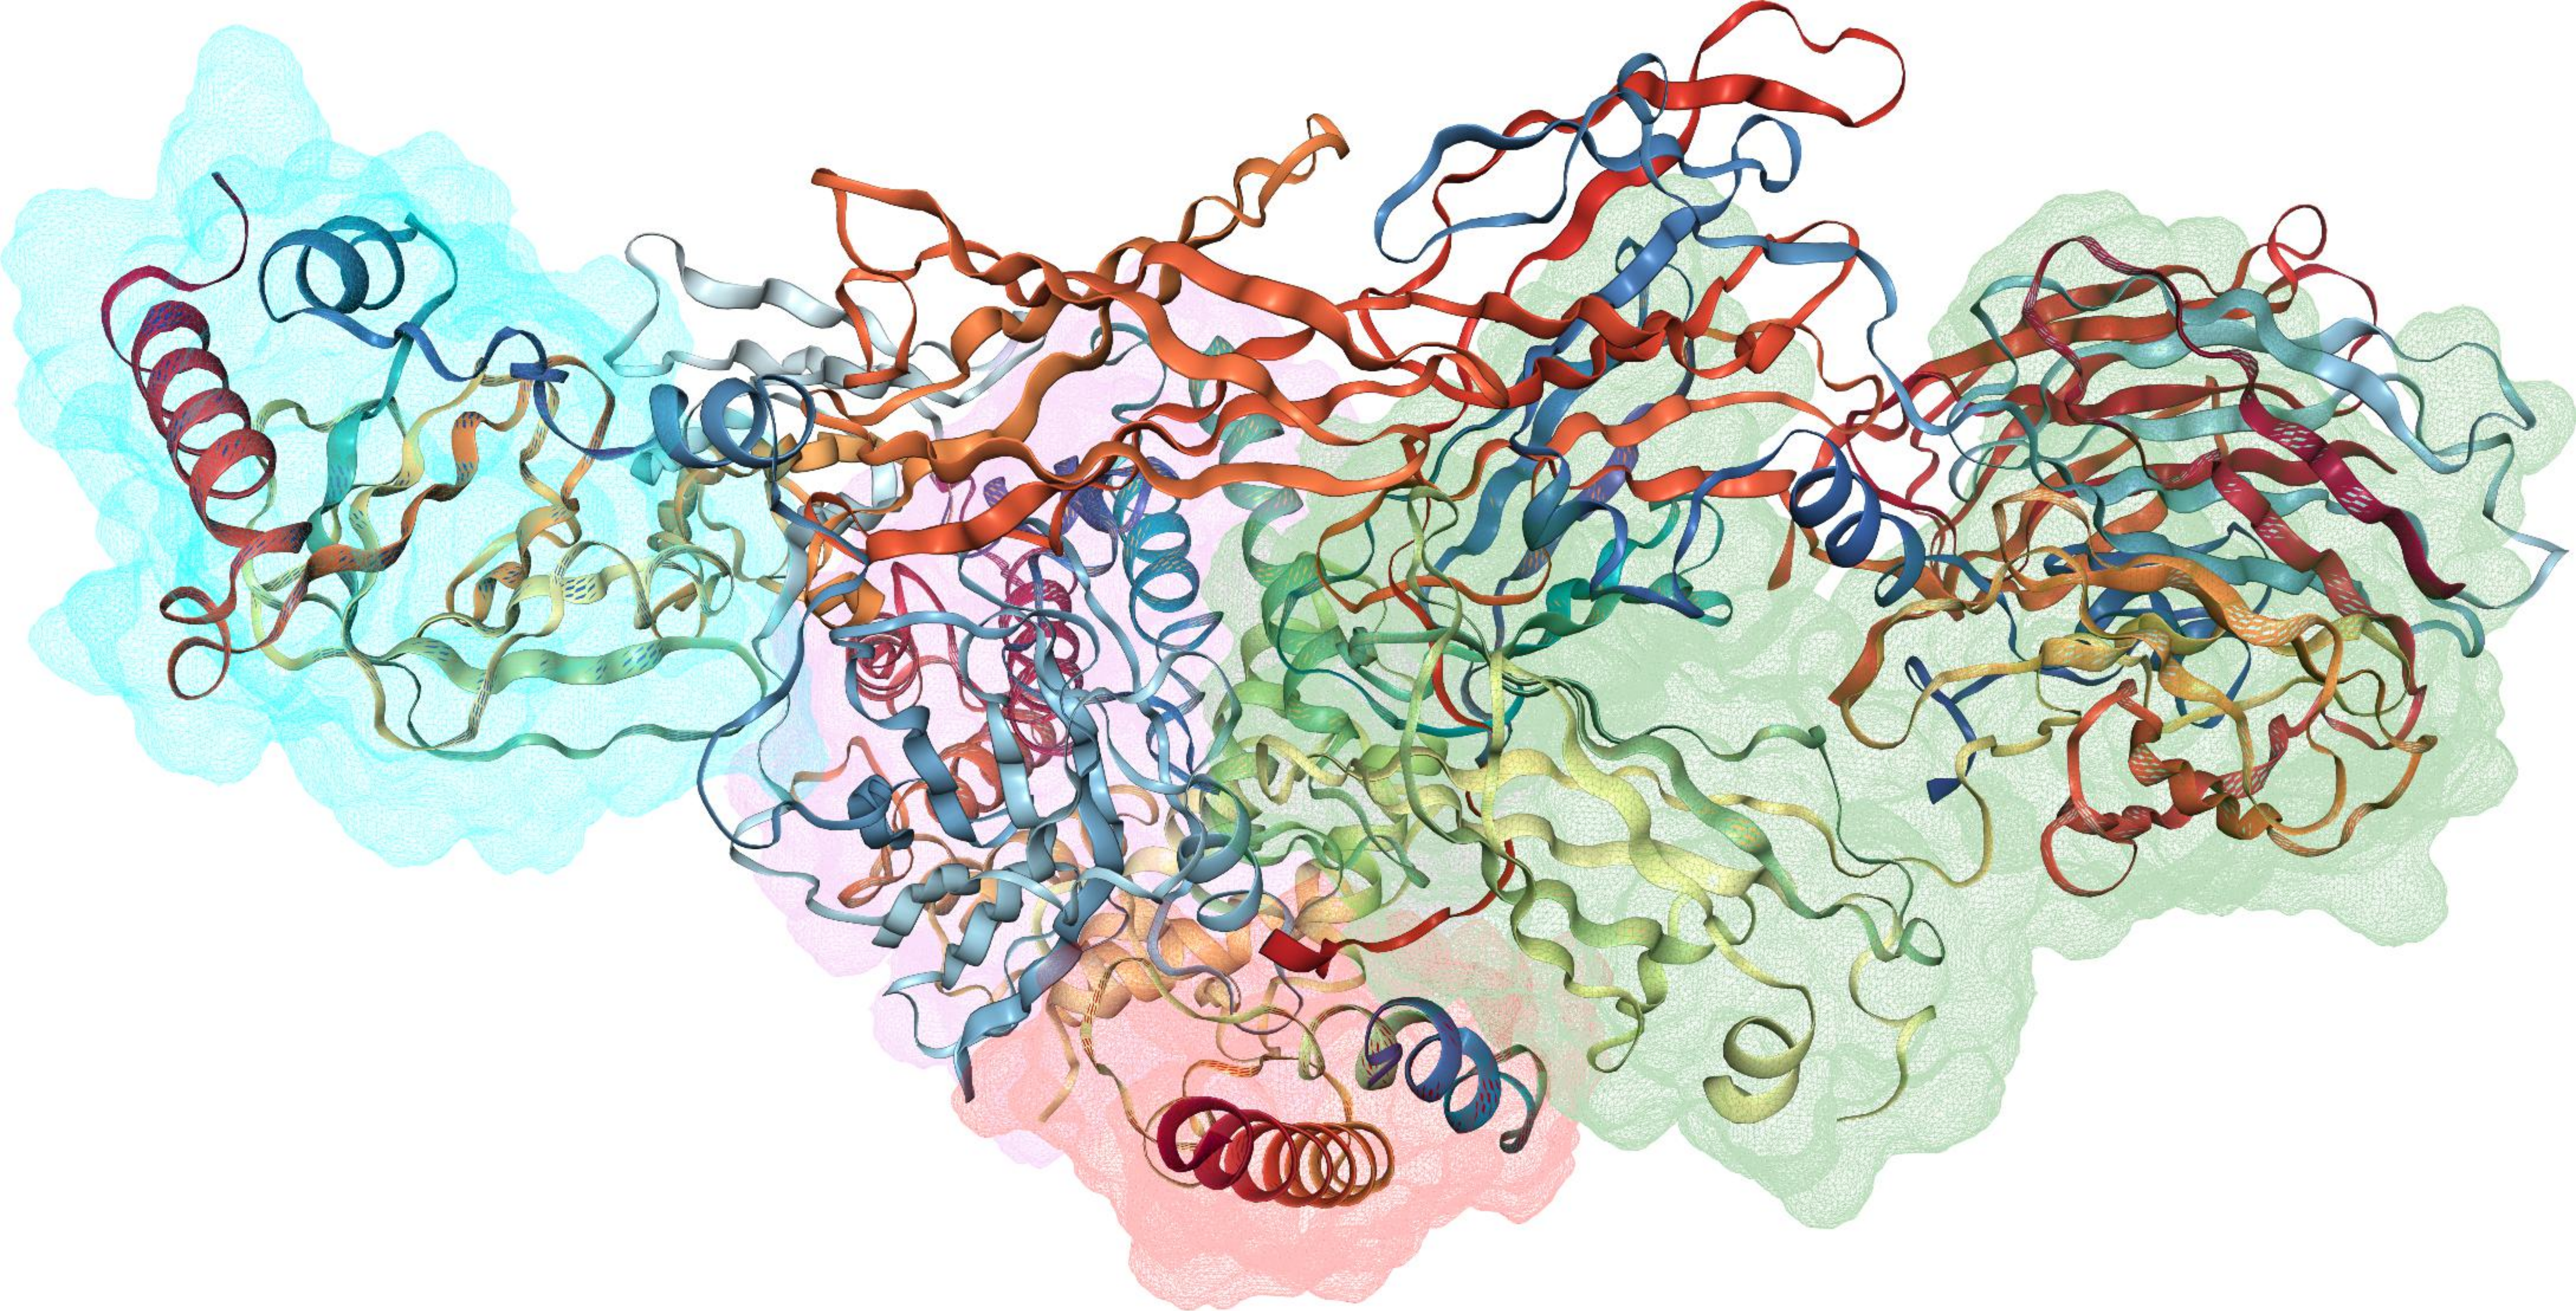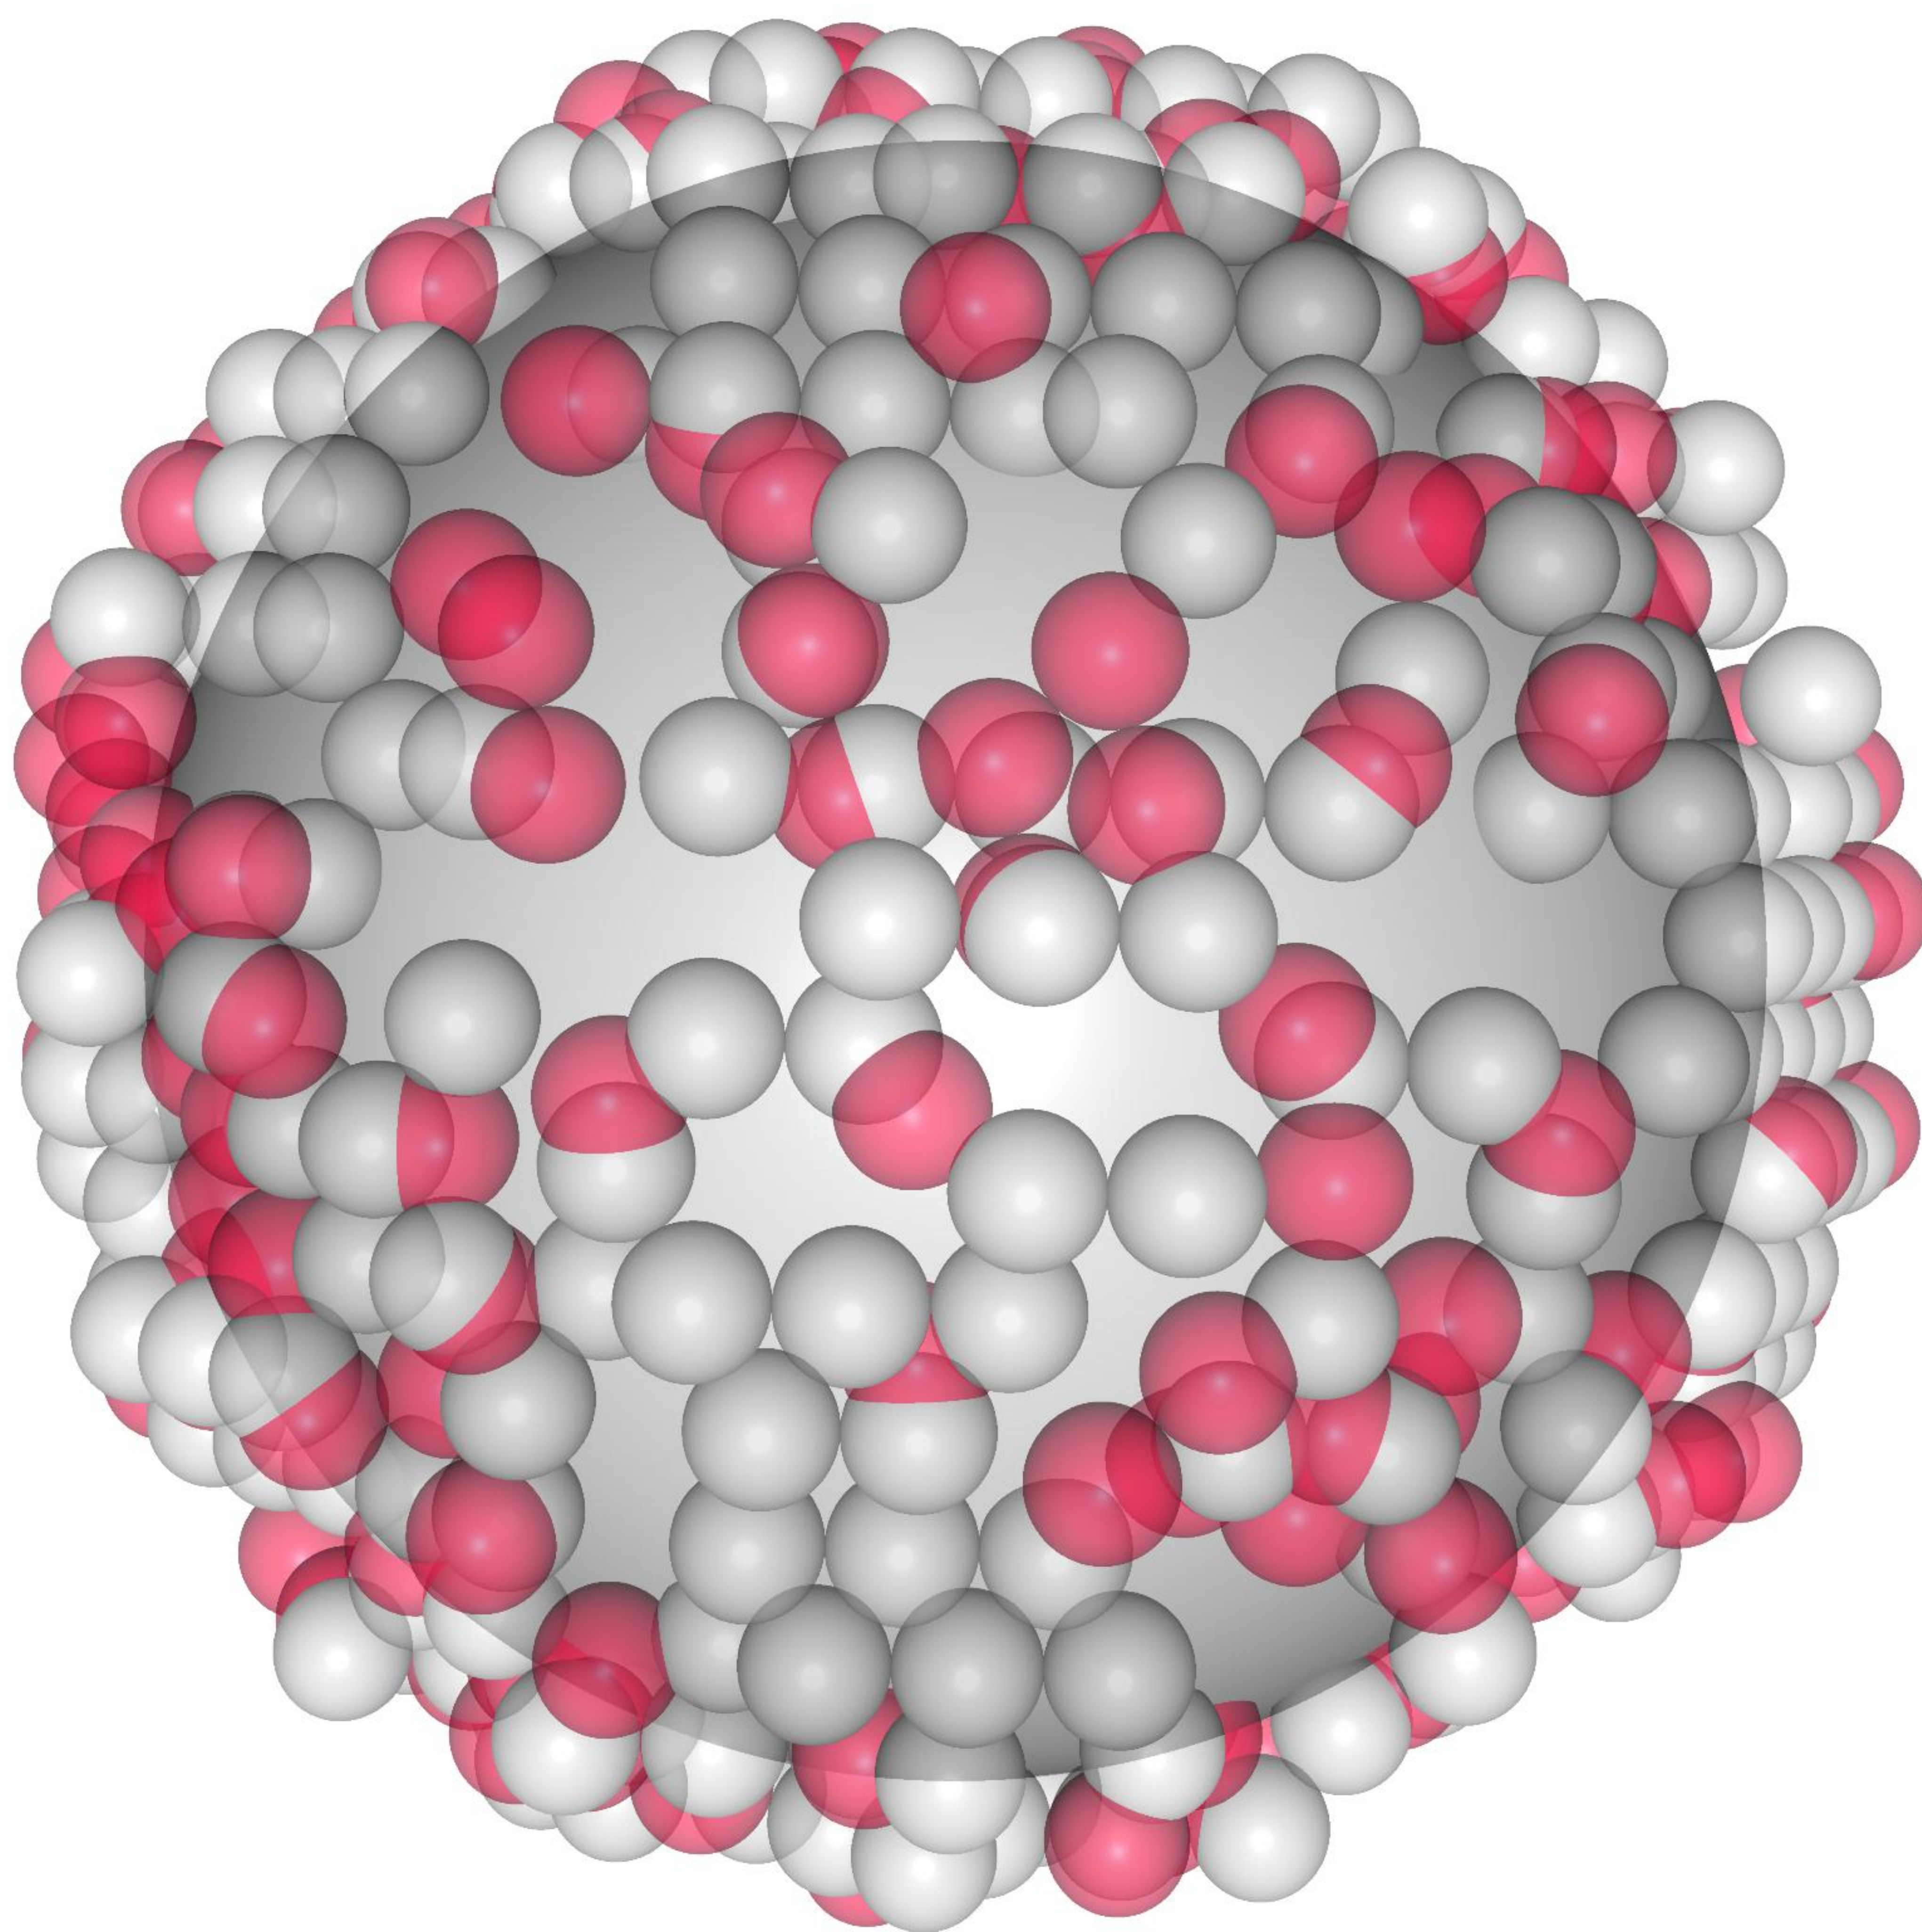

Supplement: d5en00784d1.zip [file pscooh_5nm_2a73_CG.pdf › fig_supp/complex/pscooh_5nm_2a73_CG.pdf]

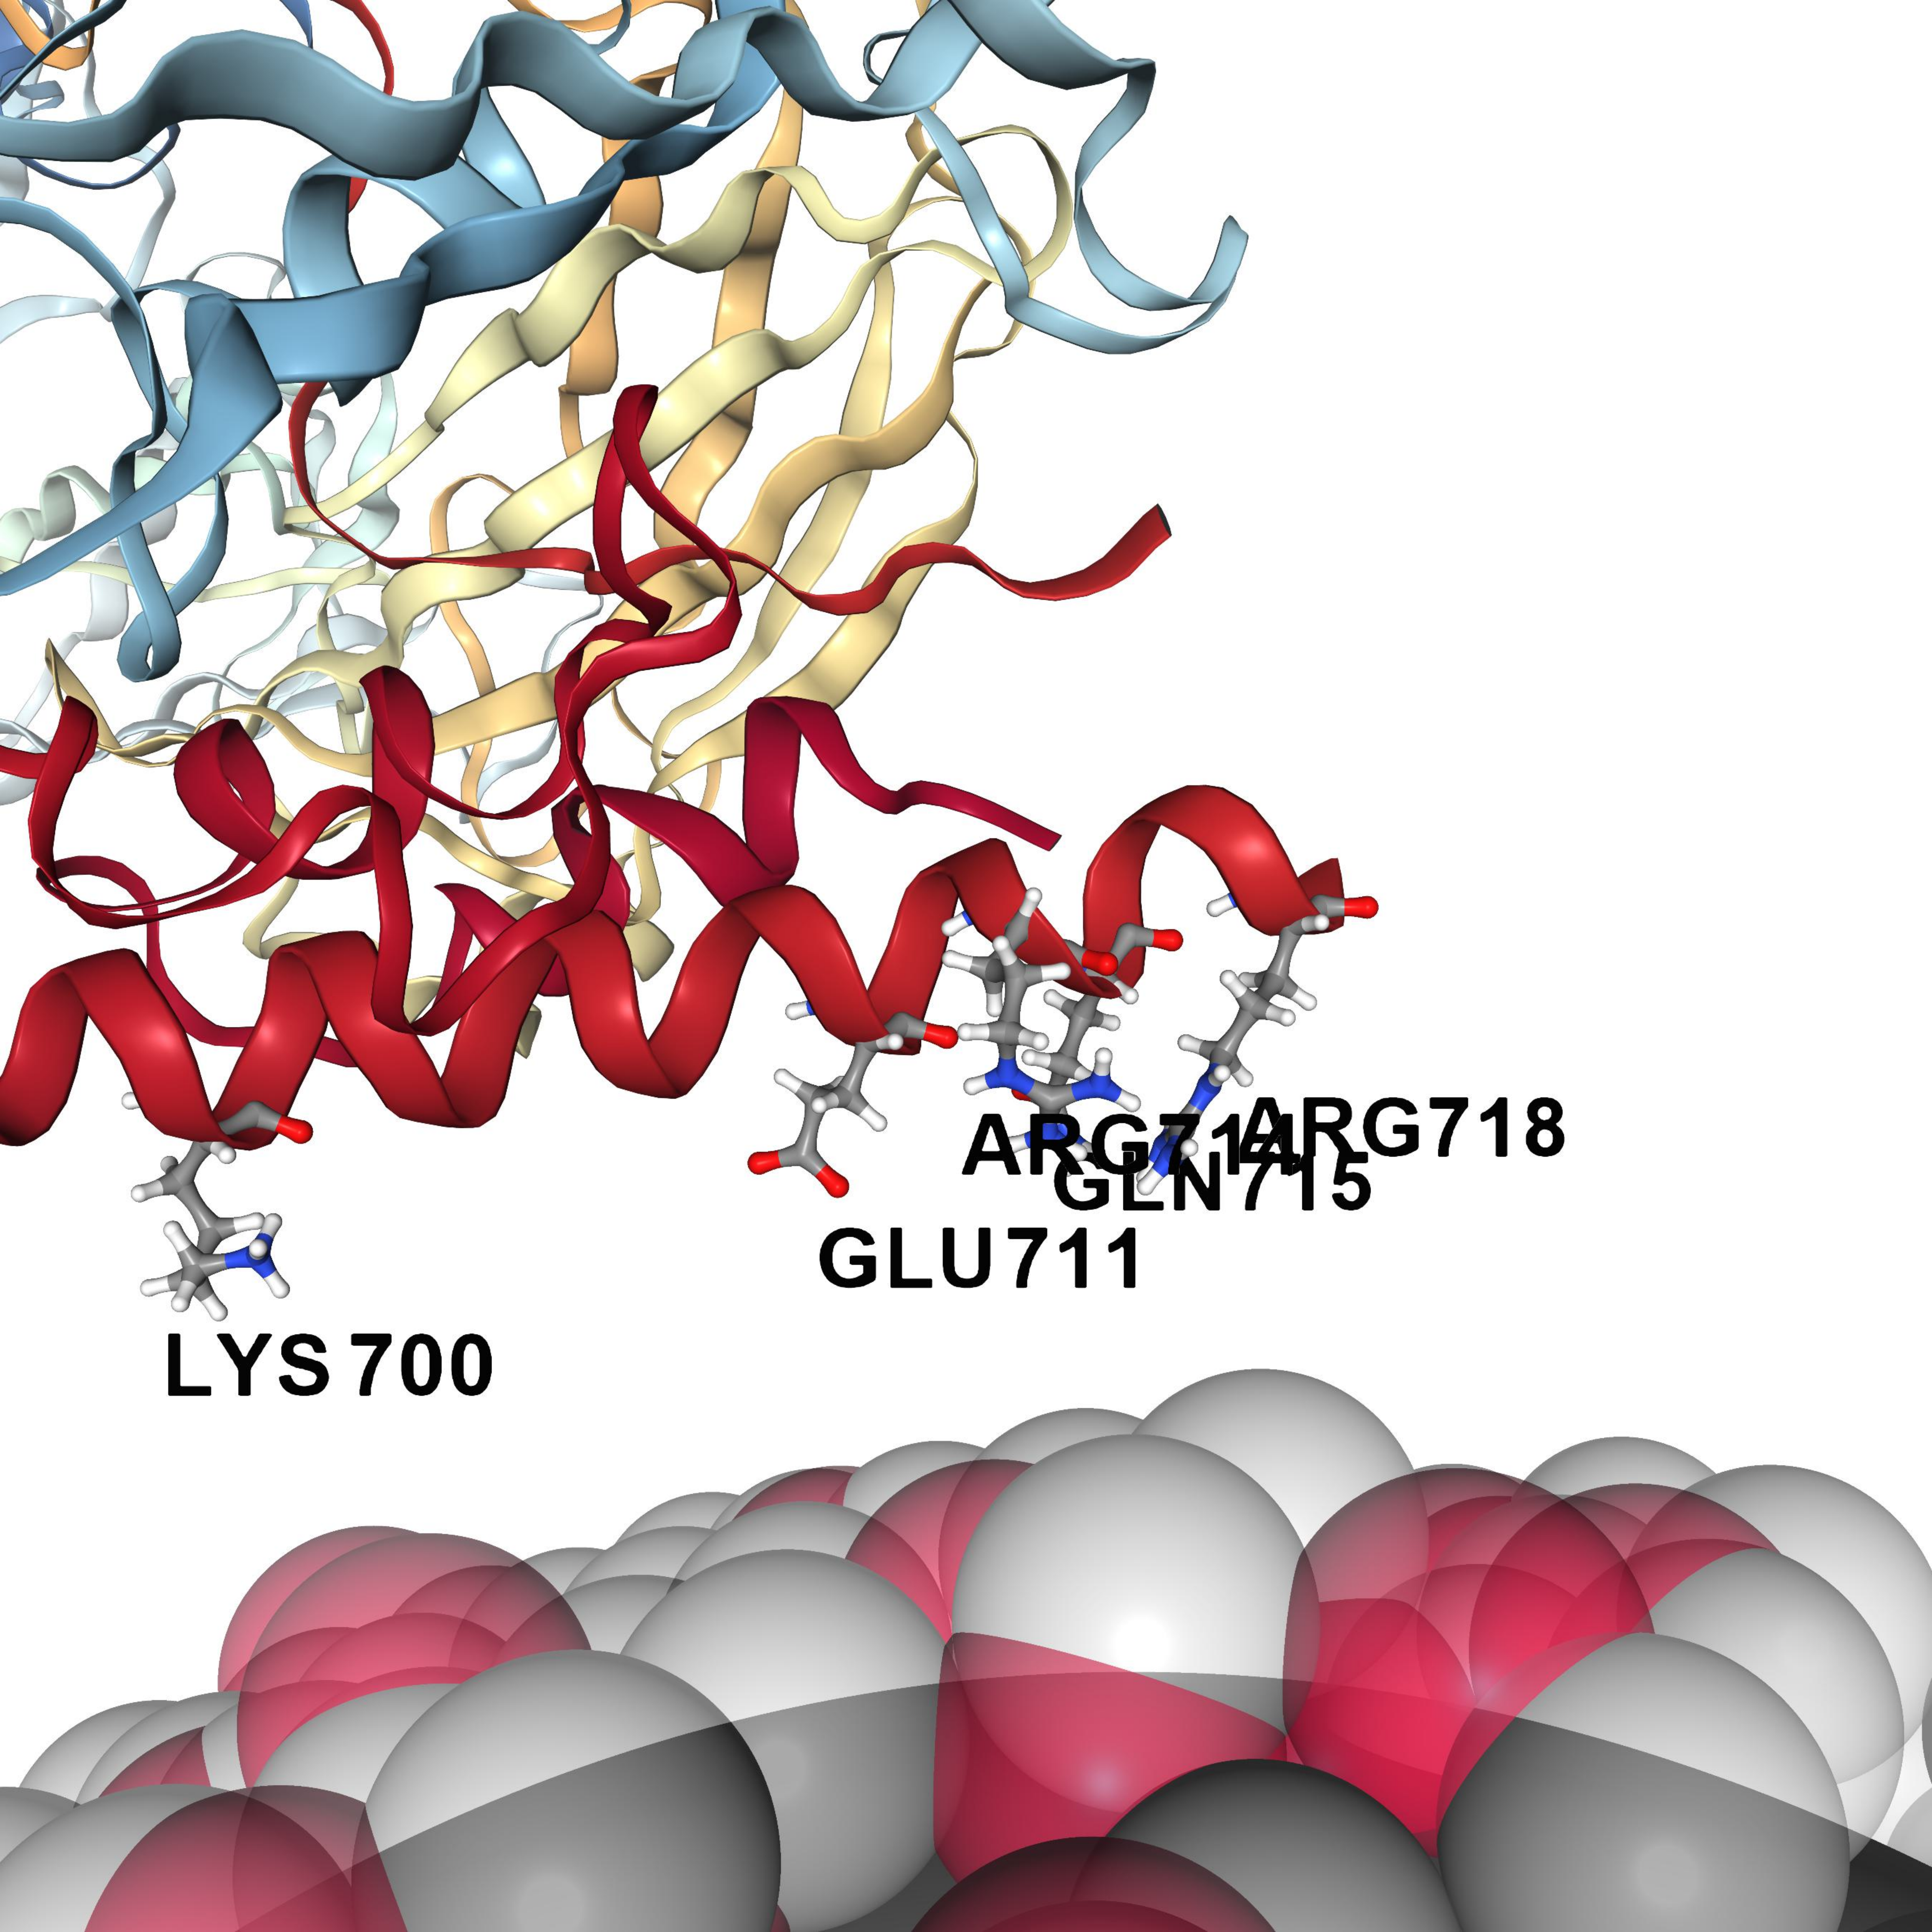

Supplement: d5en00784d1.zip [file pscooh_5nm_2a73_snap.pdf › fig_supp/complex/pscooh_5nm_2a73_snap.pdf]

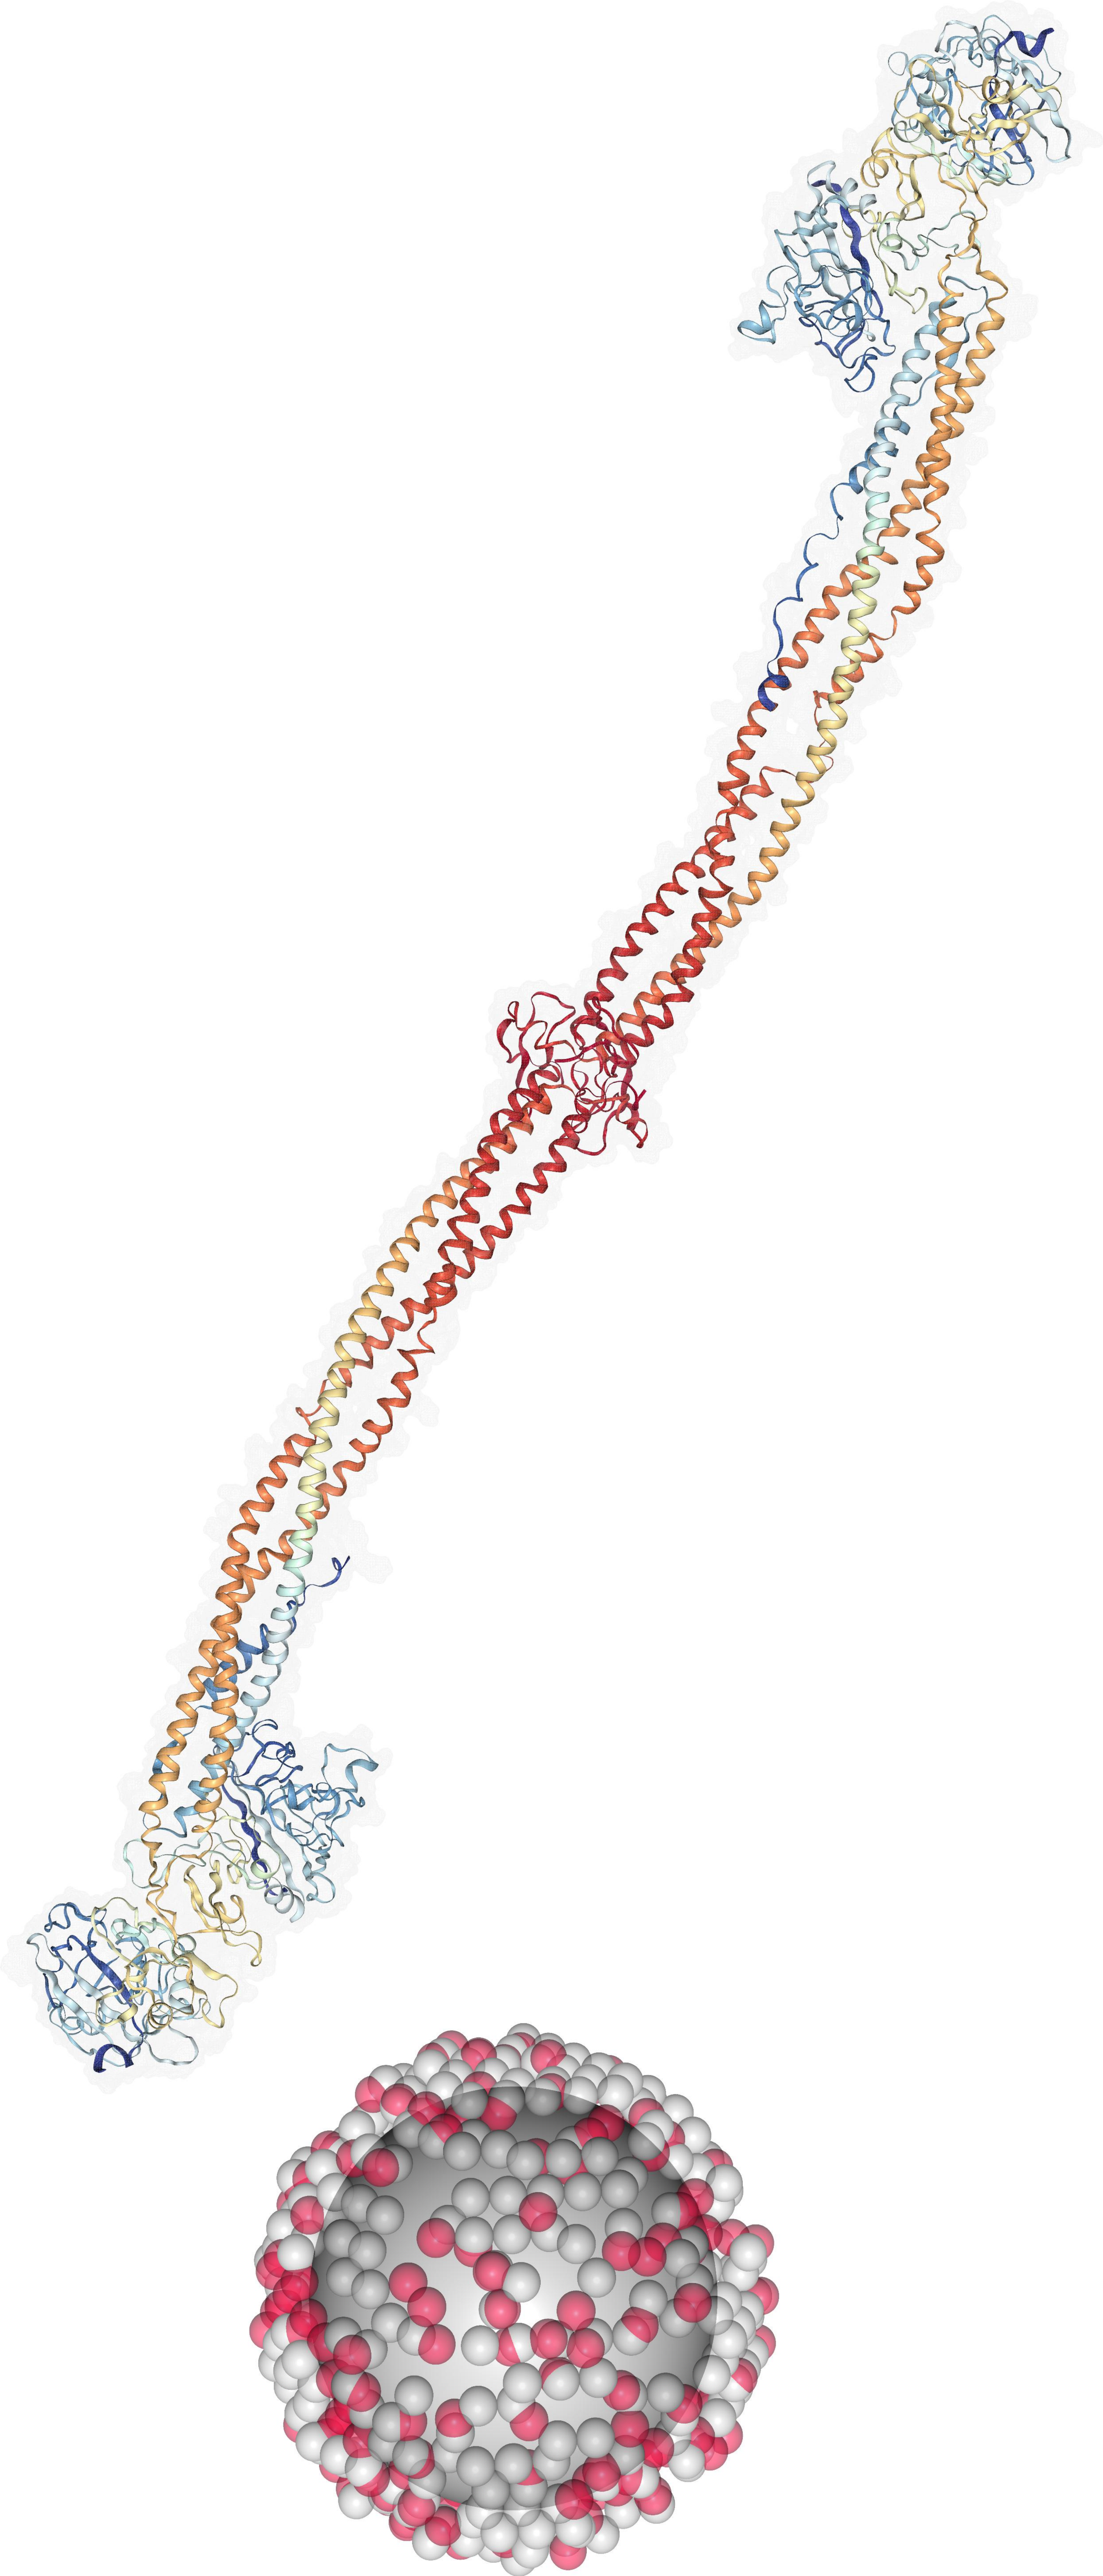

Supplement: d5en00784d1.zip [file pscooh_5nm_3ghg_CG.pdf › fig_supp/complex/pscooh_5nm_3ghg_CG.pdf]

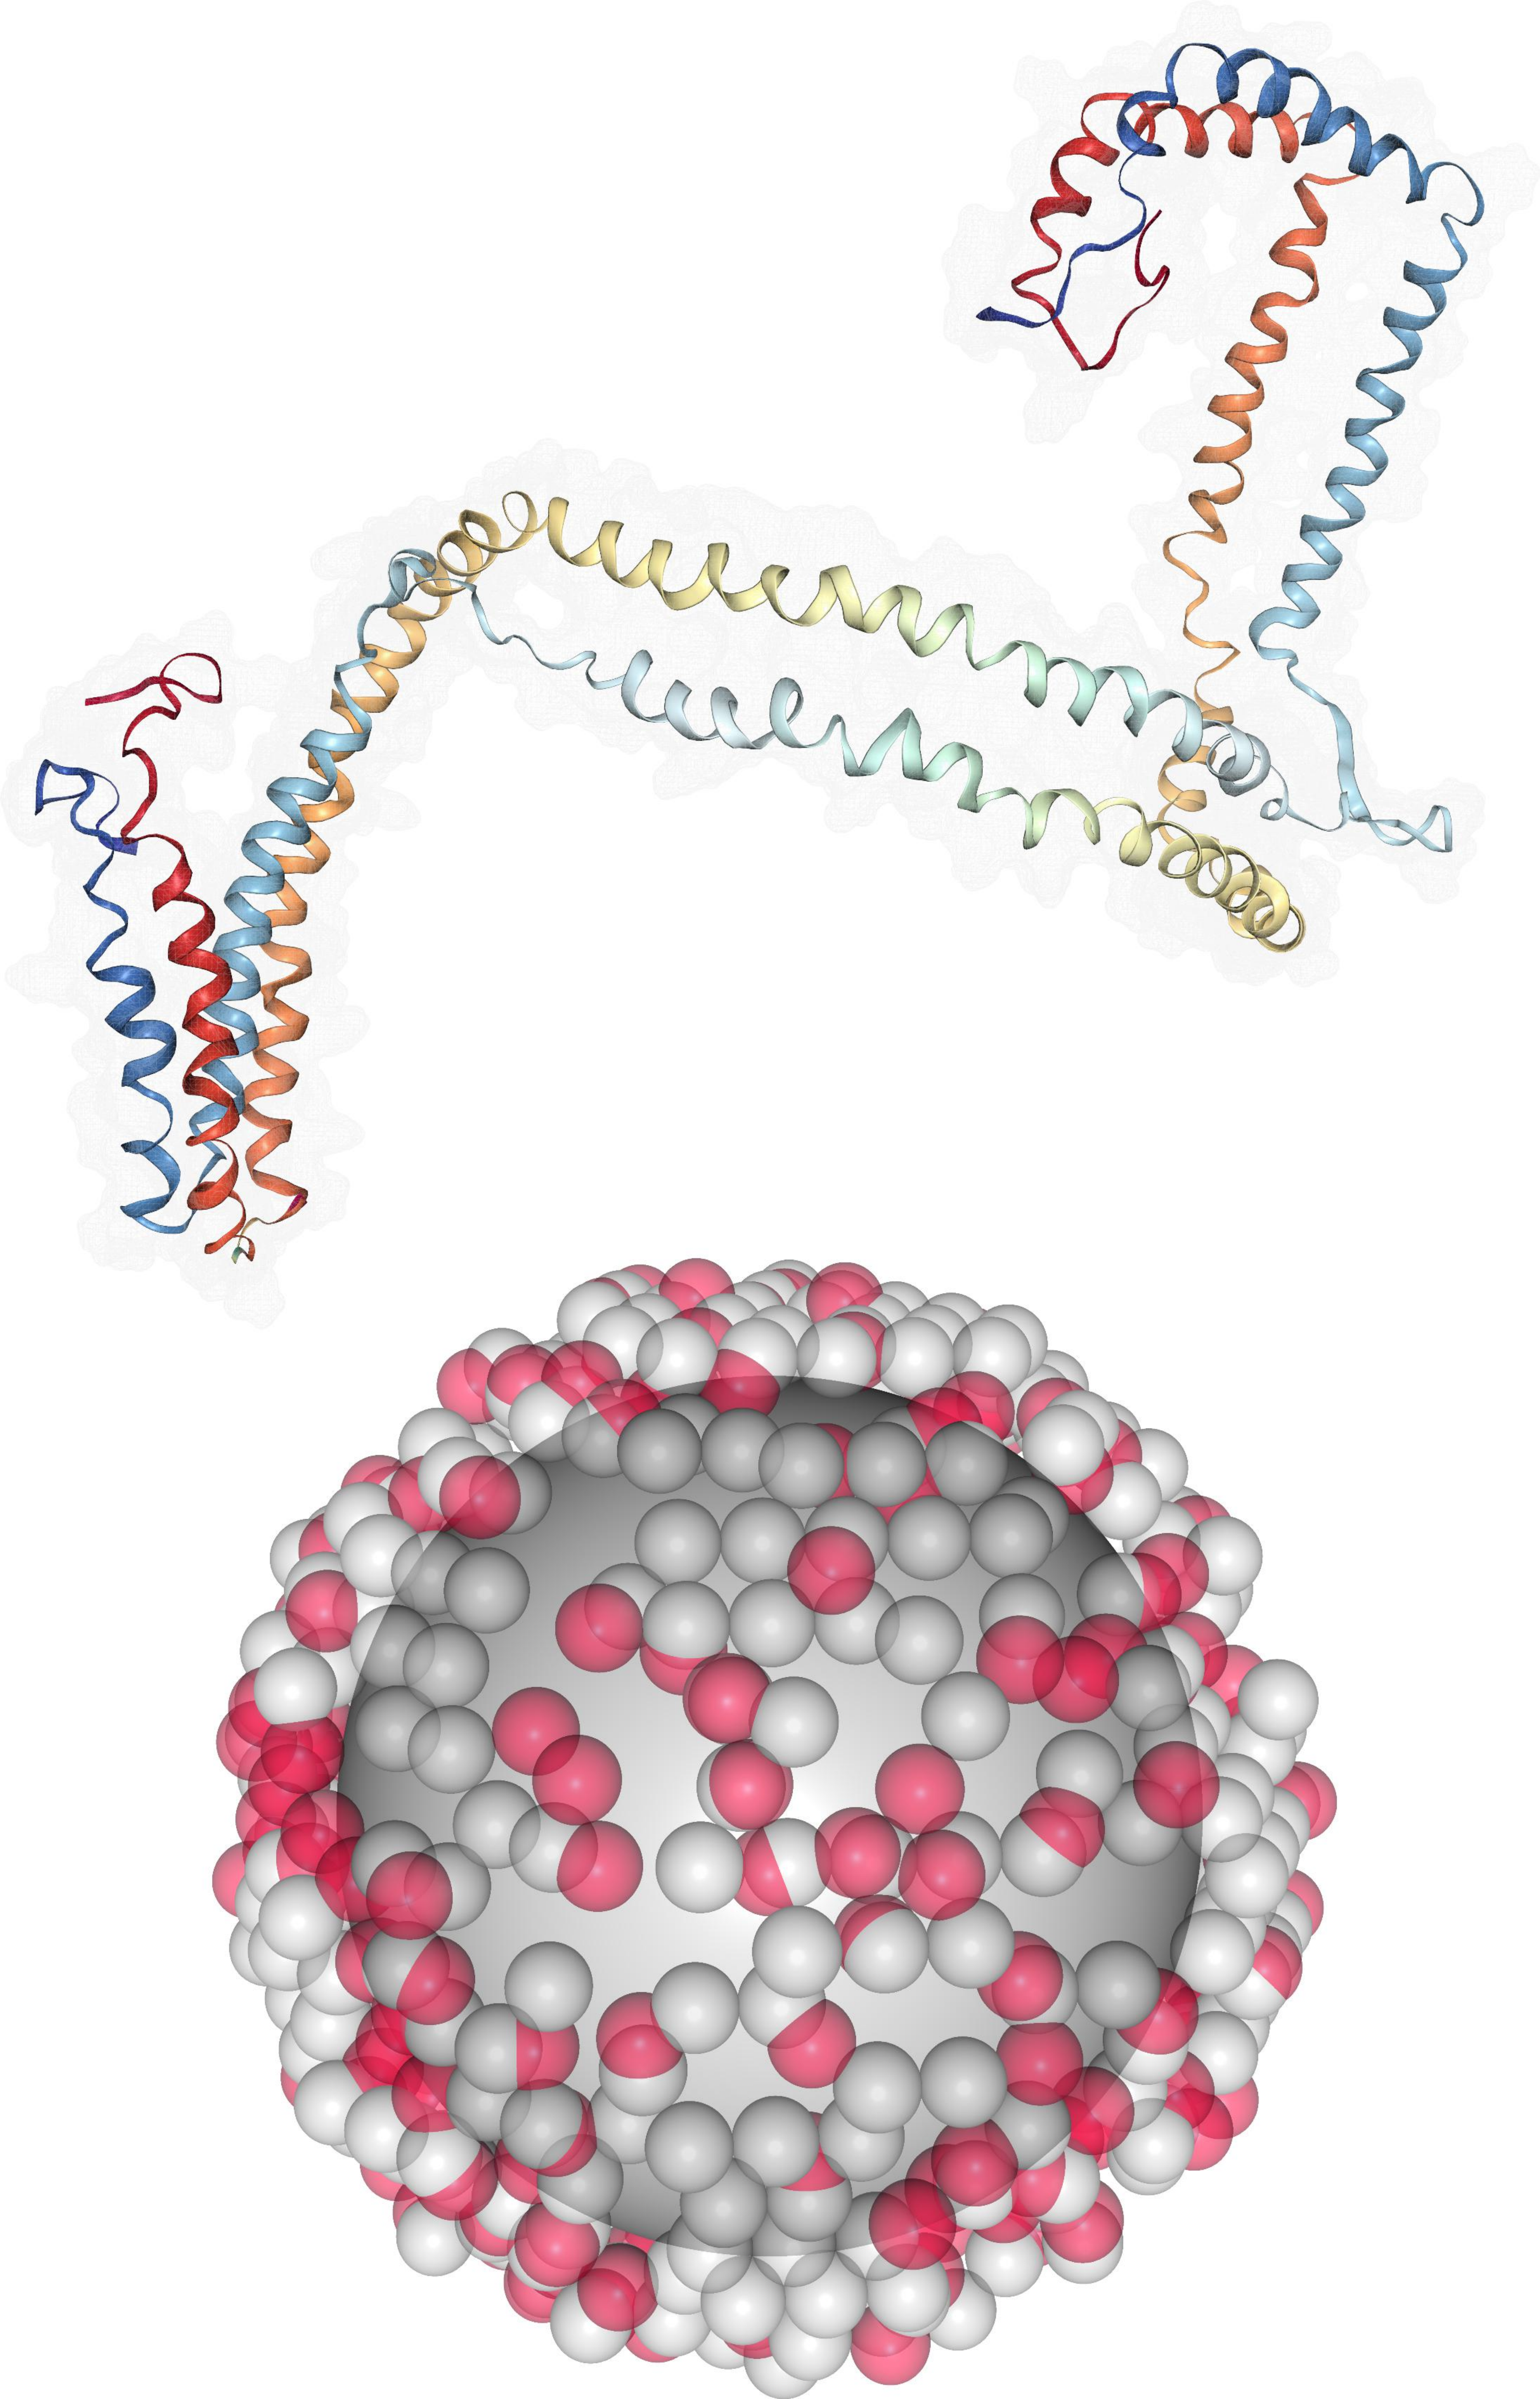

Supplement: d5en00784d1.zip [file pscooh_5nm_3k2s_CG.pdf › fig_supp/complex/pscooh_5nm_3k2s_CG.pdf]

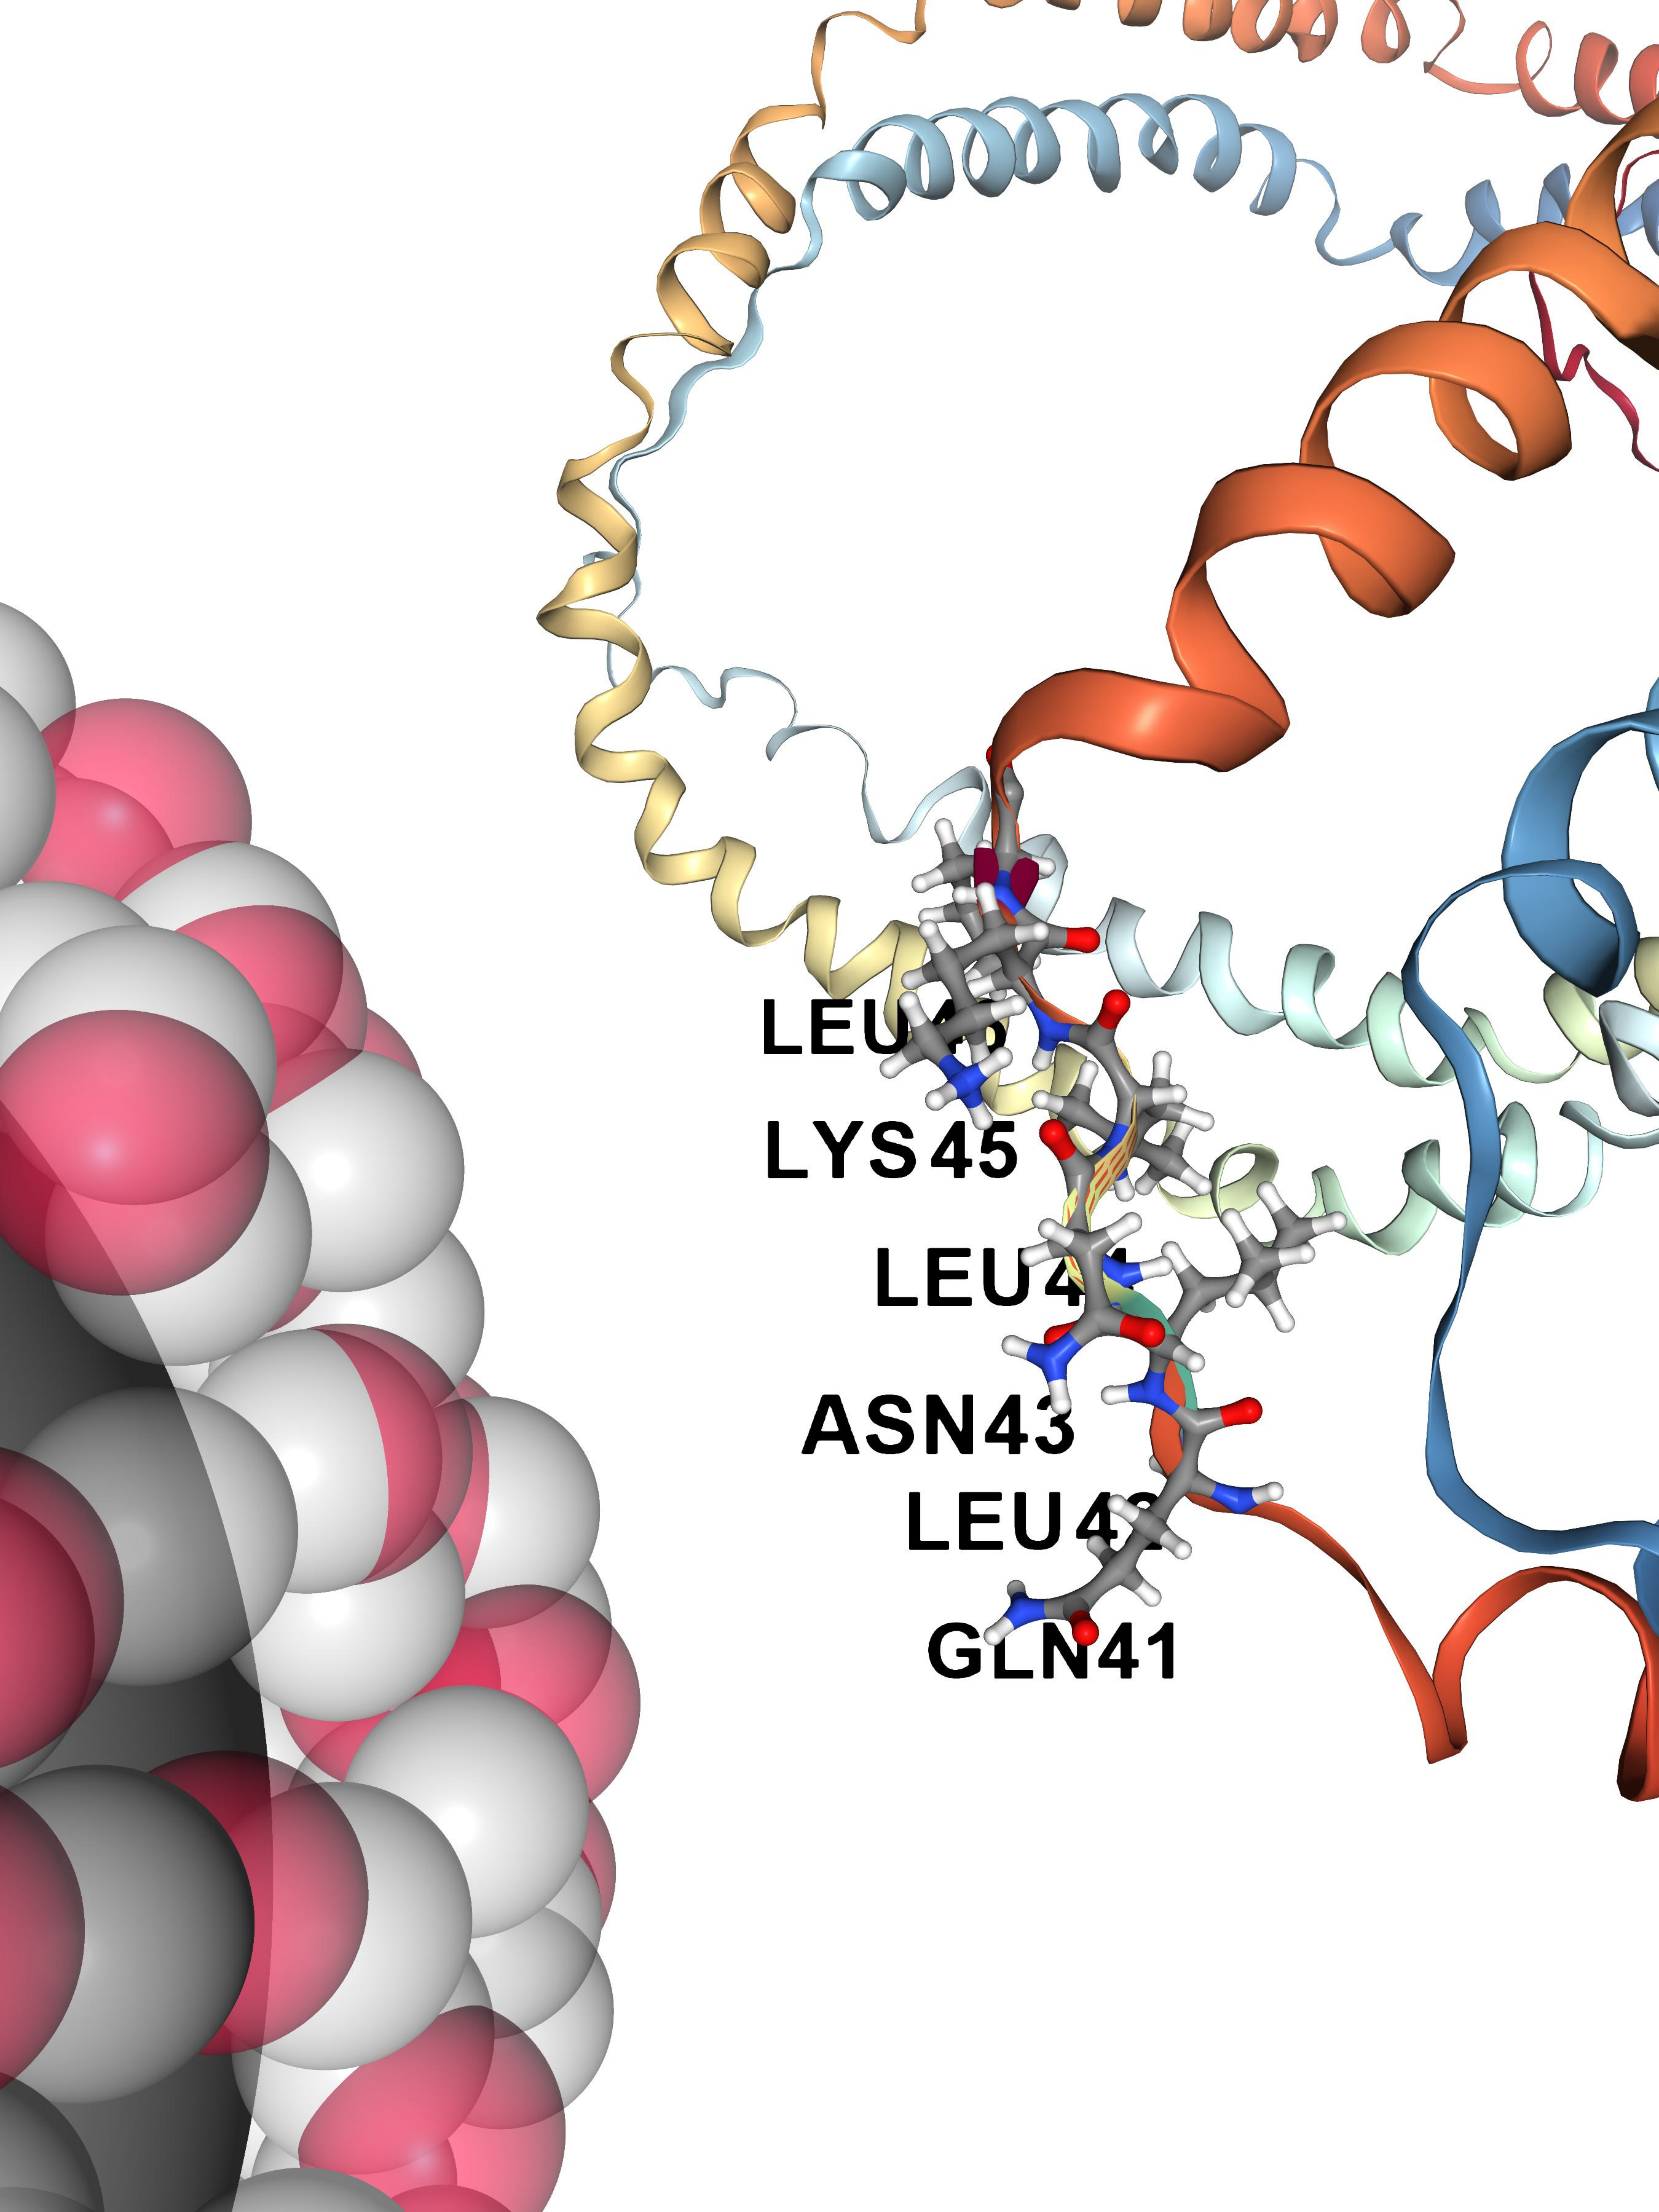

**LEU44**

**LYS45**

**LEU46**

**ASN43**

**LEU48**

**GLN41**

Supplement: d5en00784d1.zip [file pscooh_5nm_3k2s_snap.pdf › fig_supp/complex/pscooh_5nm_3k2s_snap.pdf]

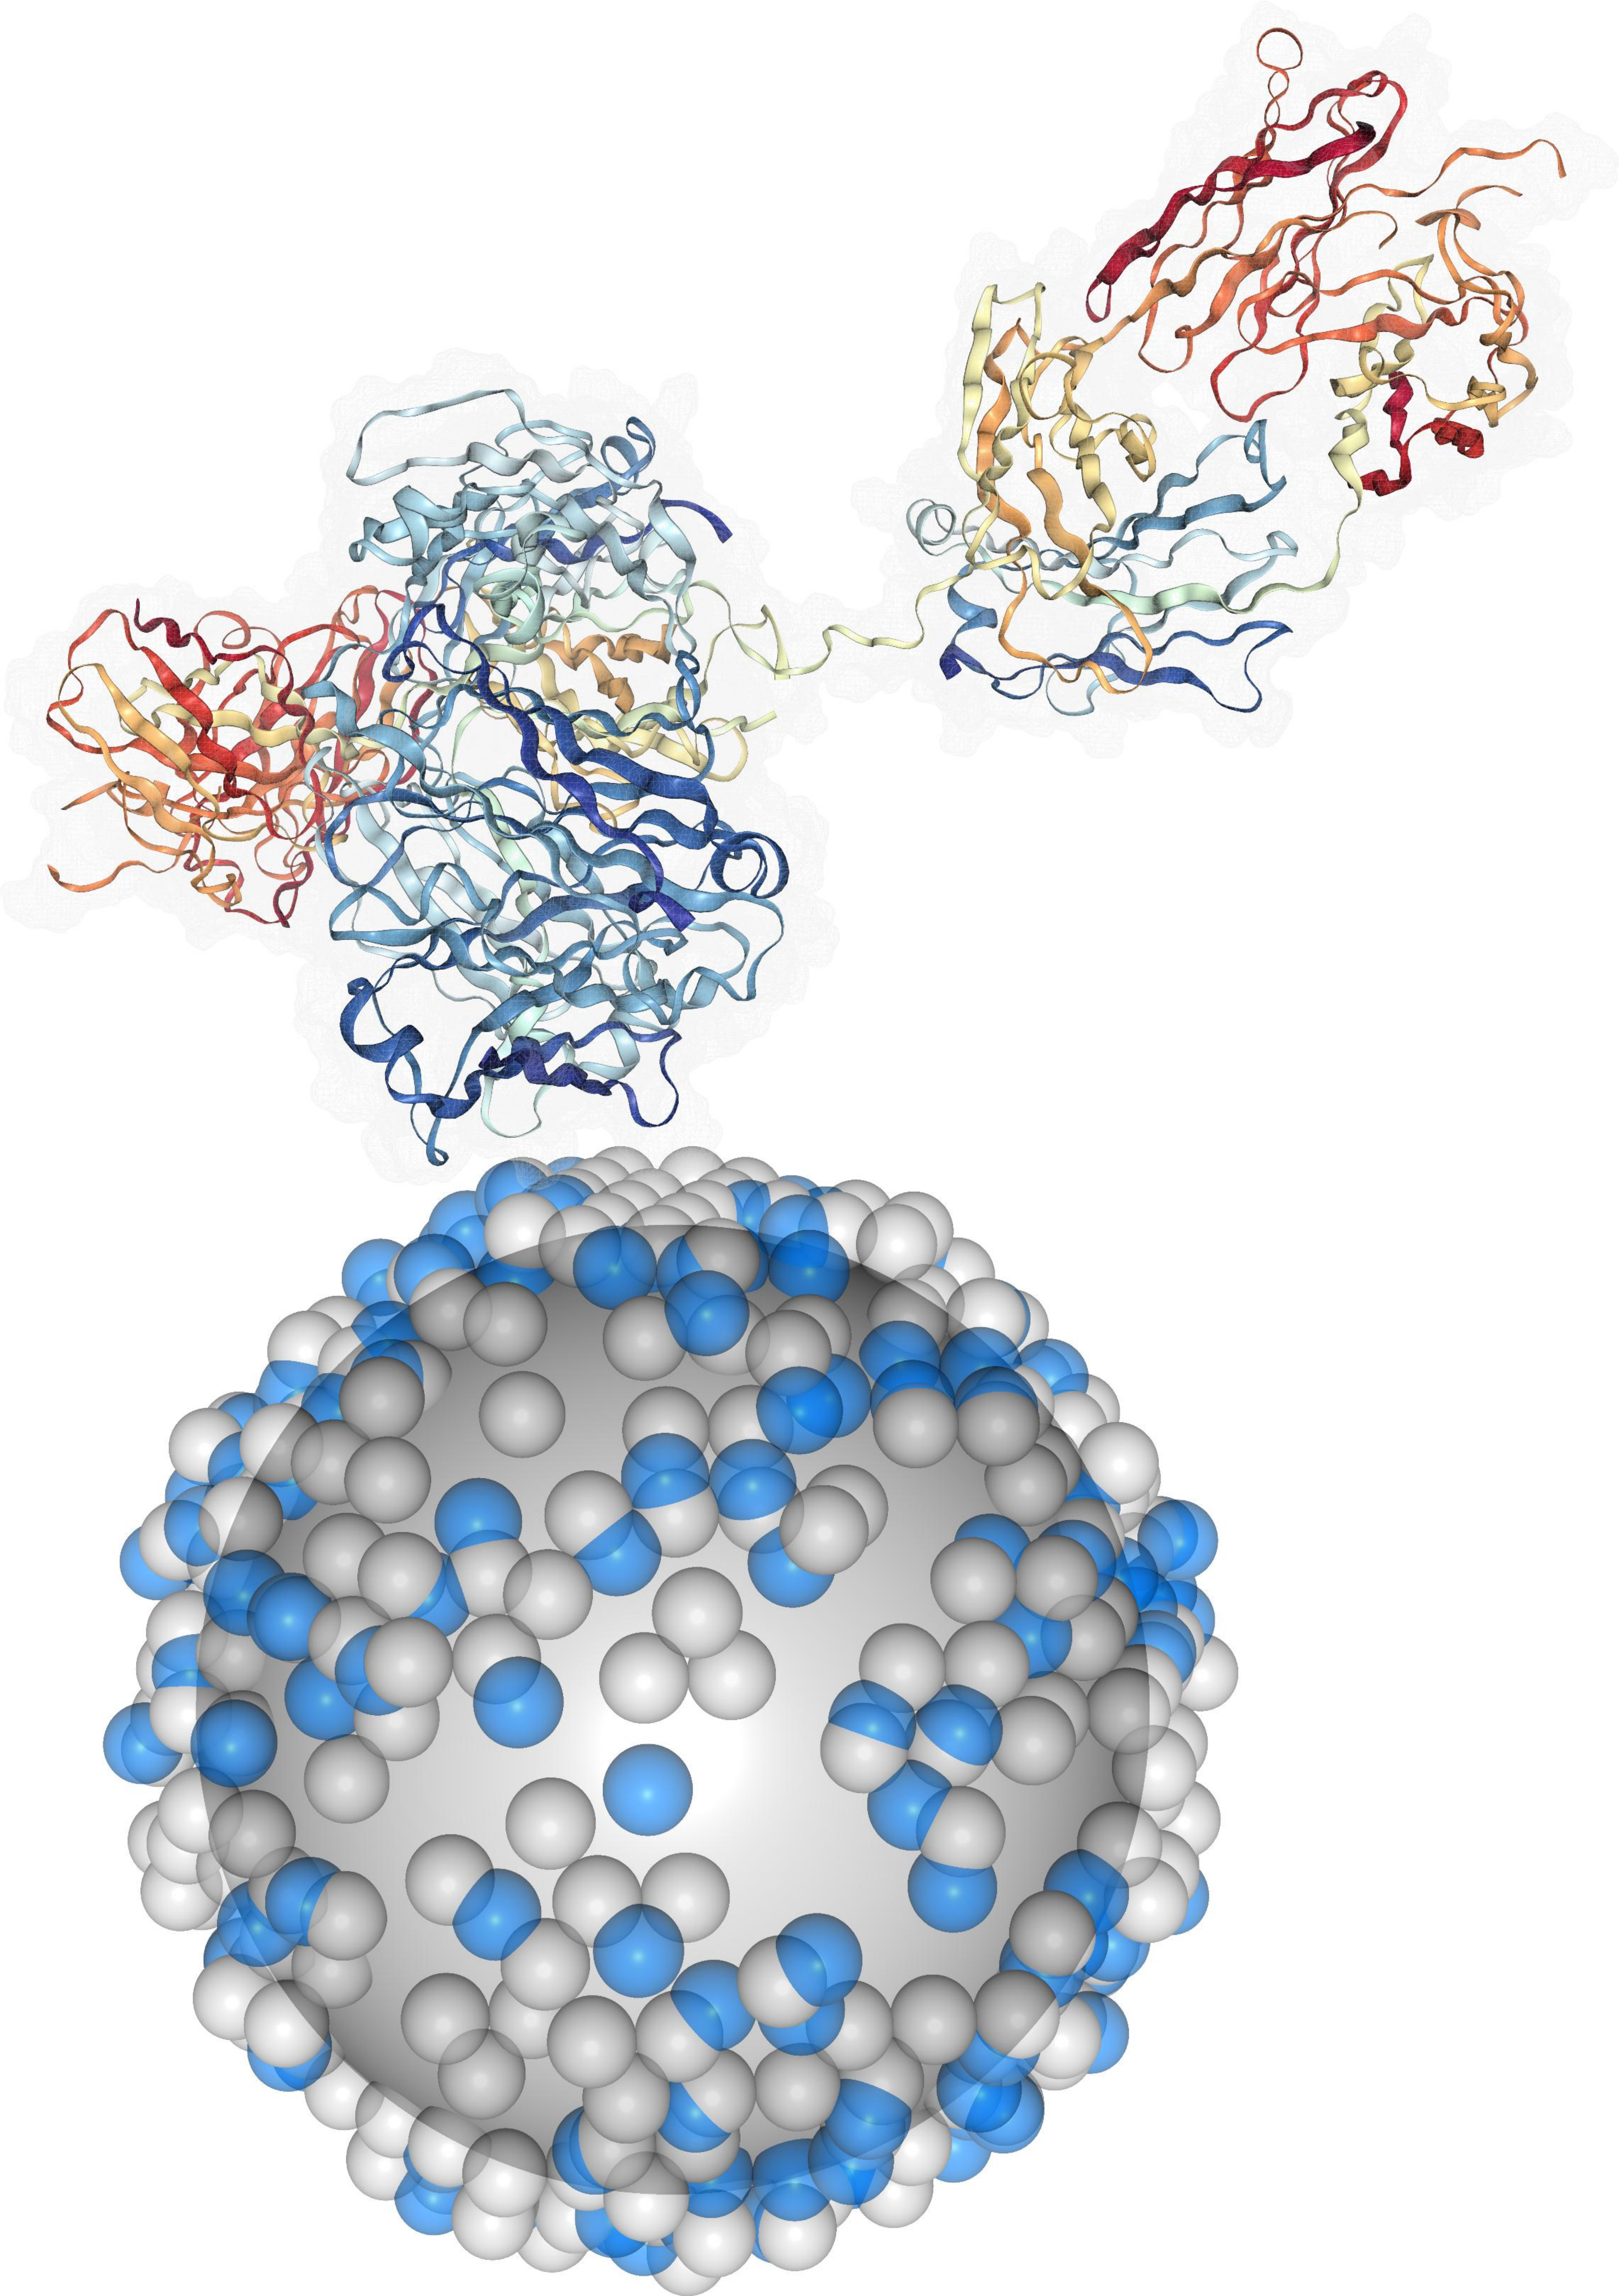

Supplement: d5en00784d1.zip [file psnh2_5nm_1hzh_CG.pdf › fig_supp/complex/psnh2_5nm_1hzh_CG.pdf]

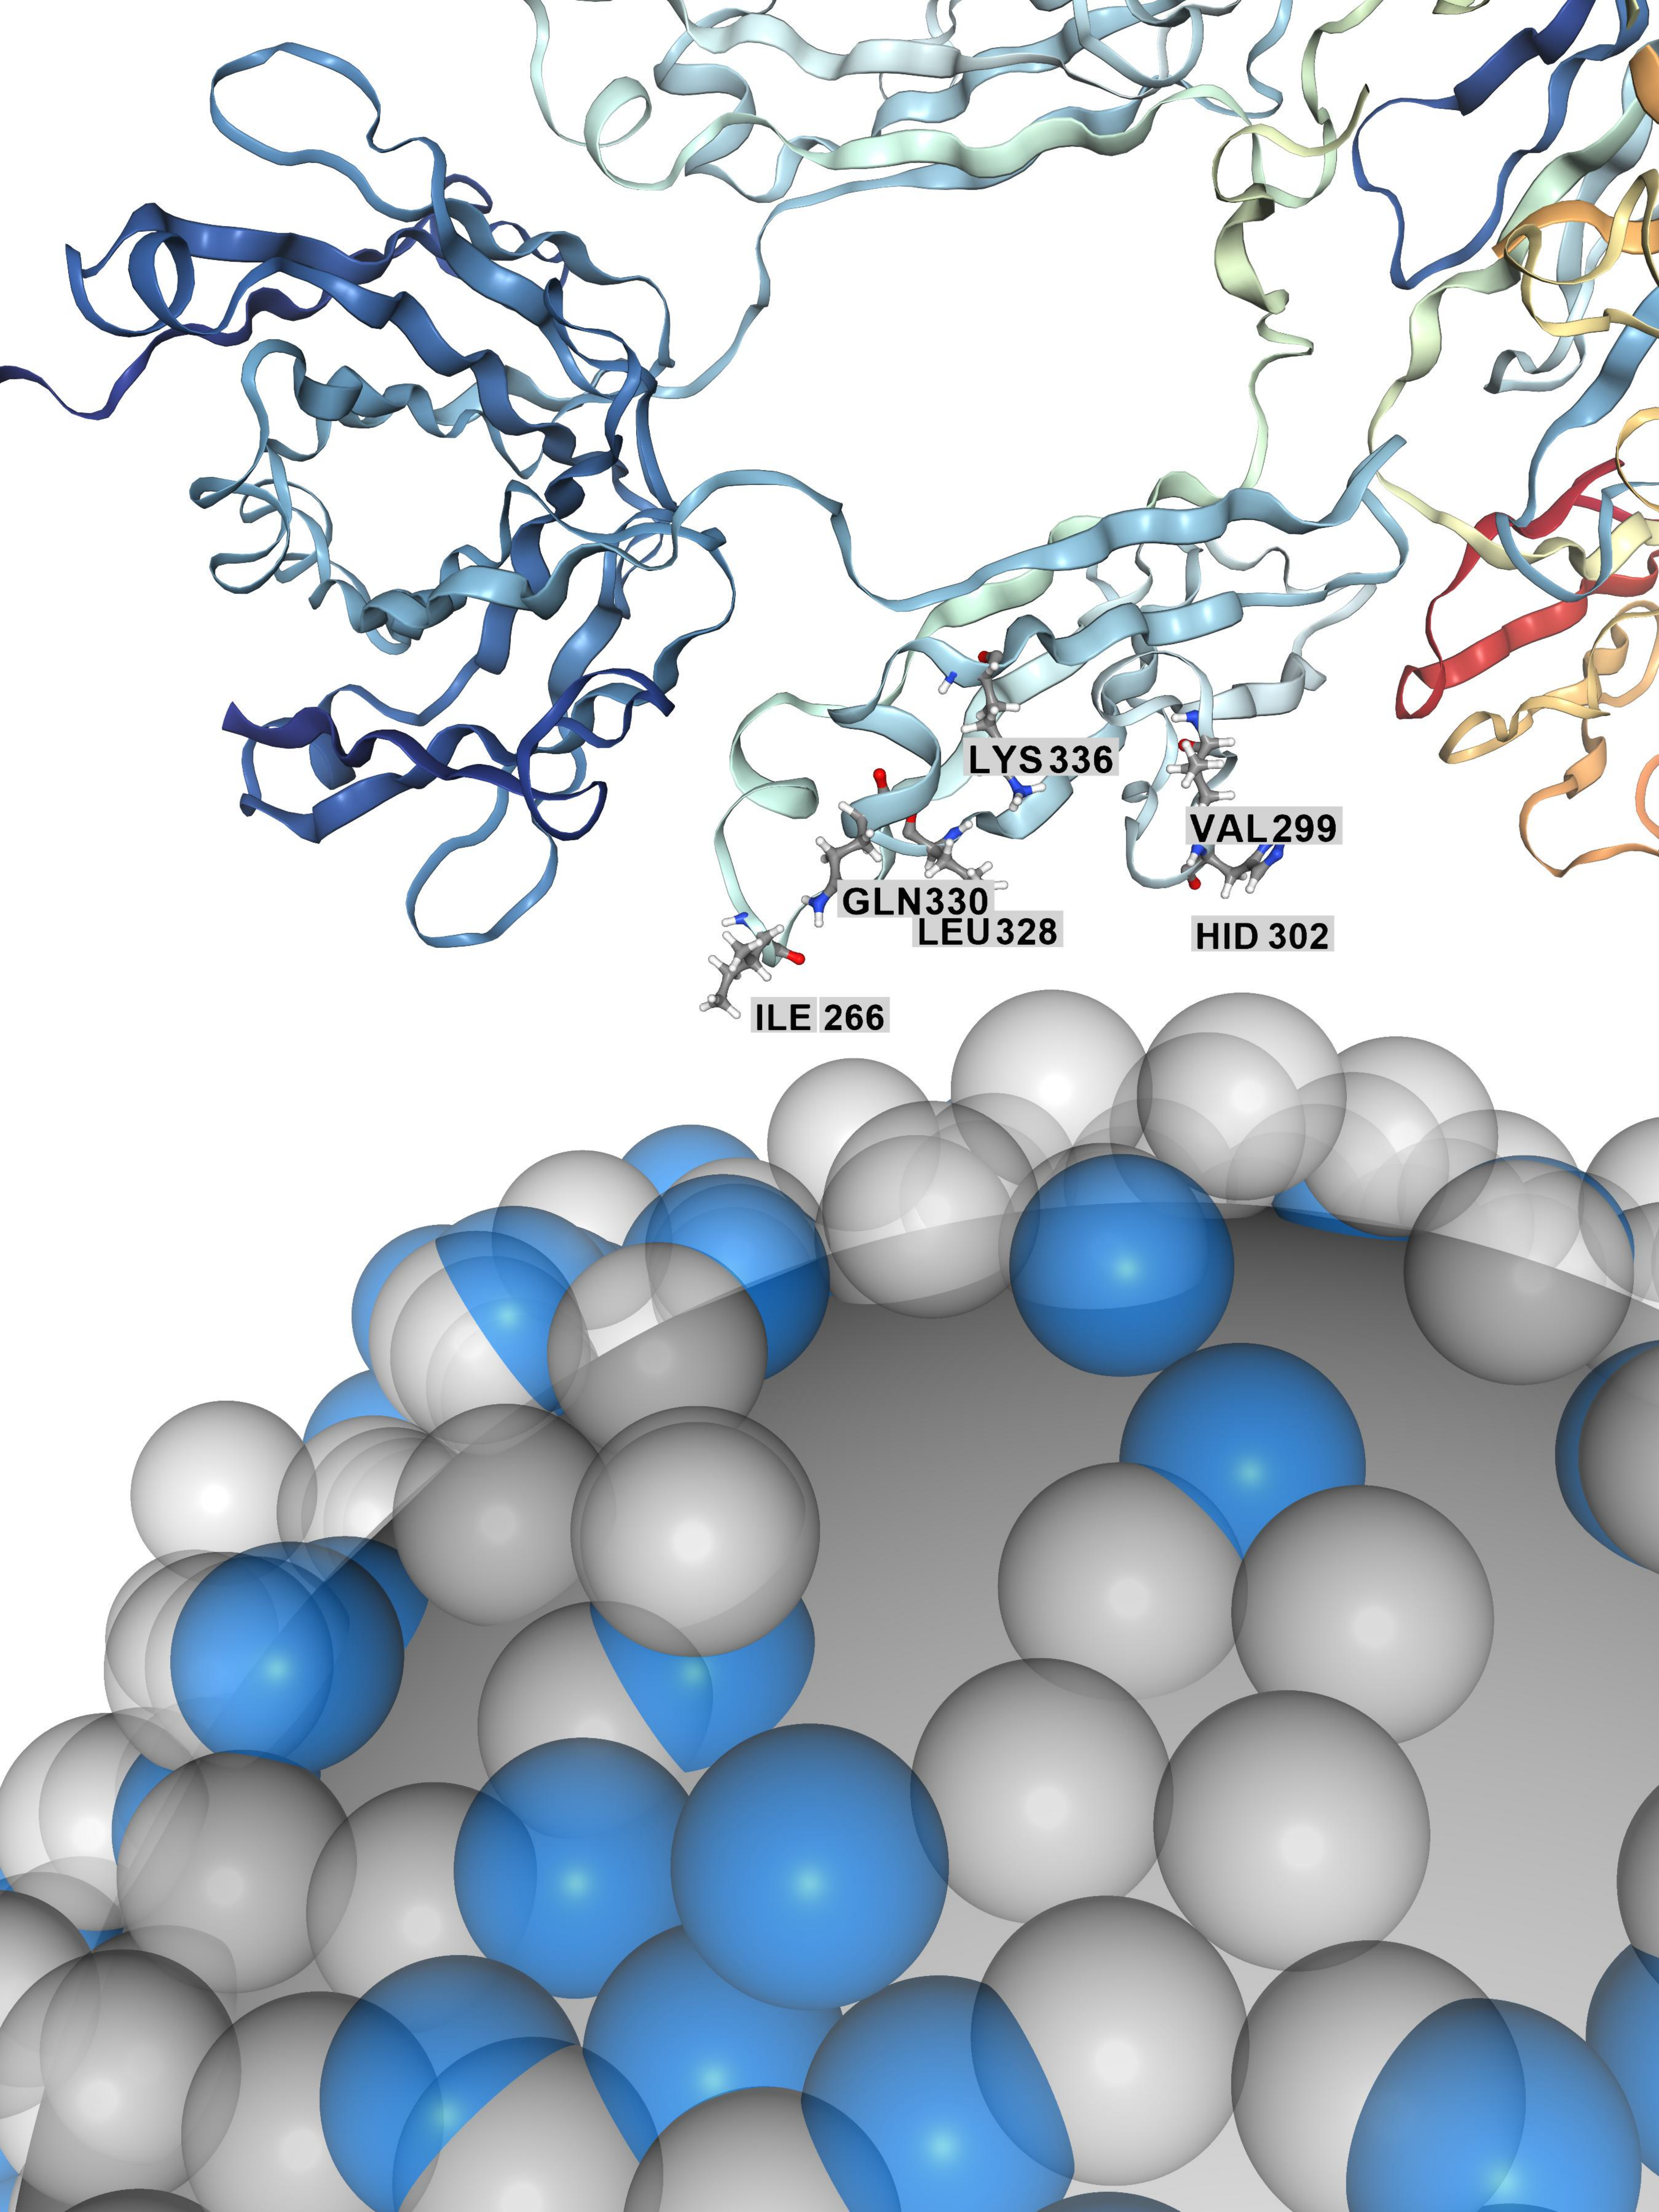

Supplement: d5en00784d1.zip [file psnh2_5nm_1hzh_snap.pdf › fig_supp/complex/psnh2_5nm_1hzh_snap.pdf]

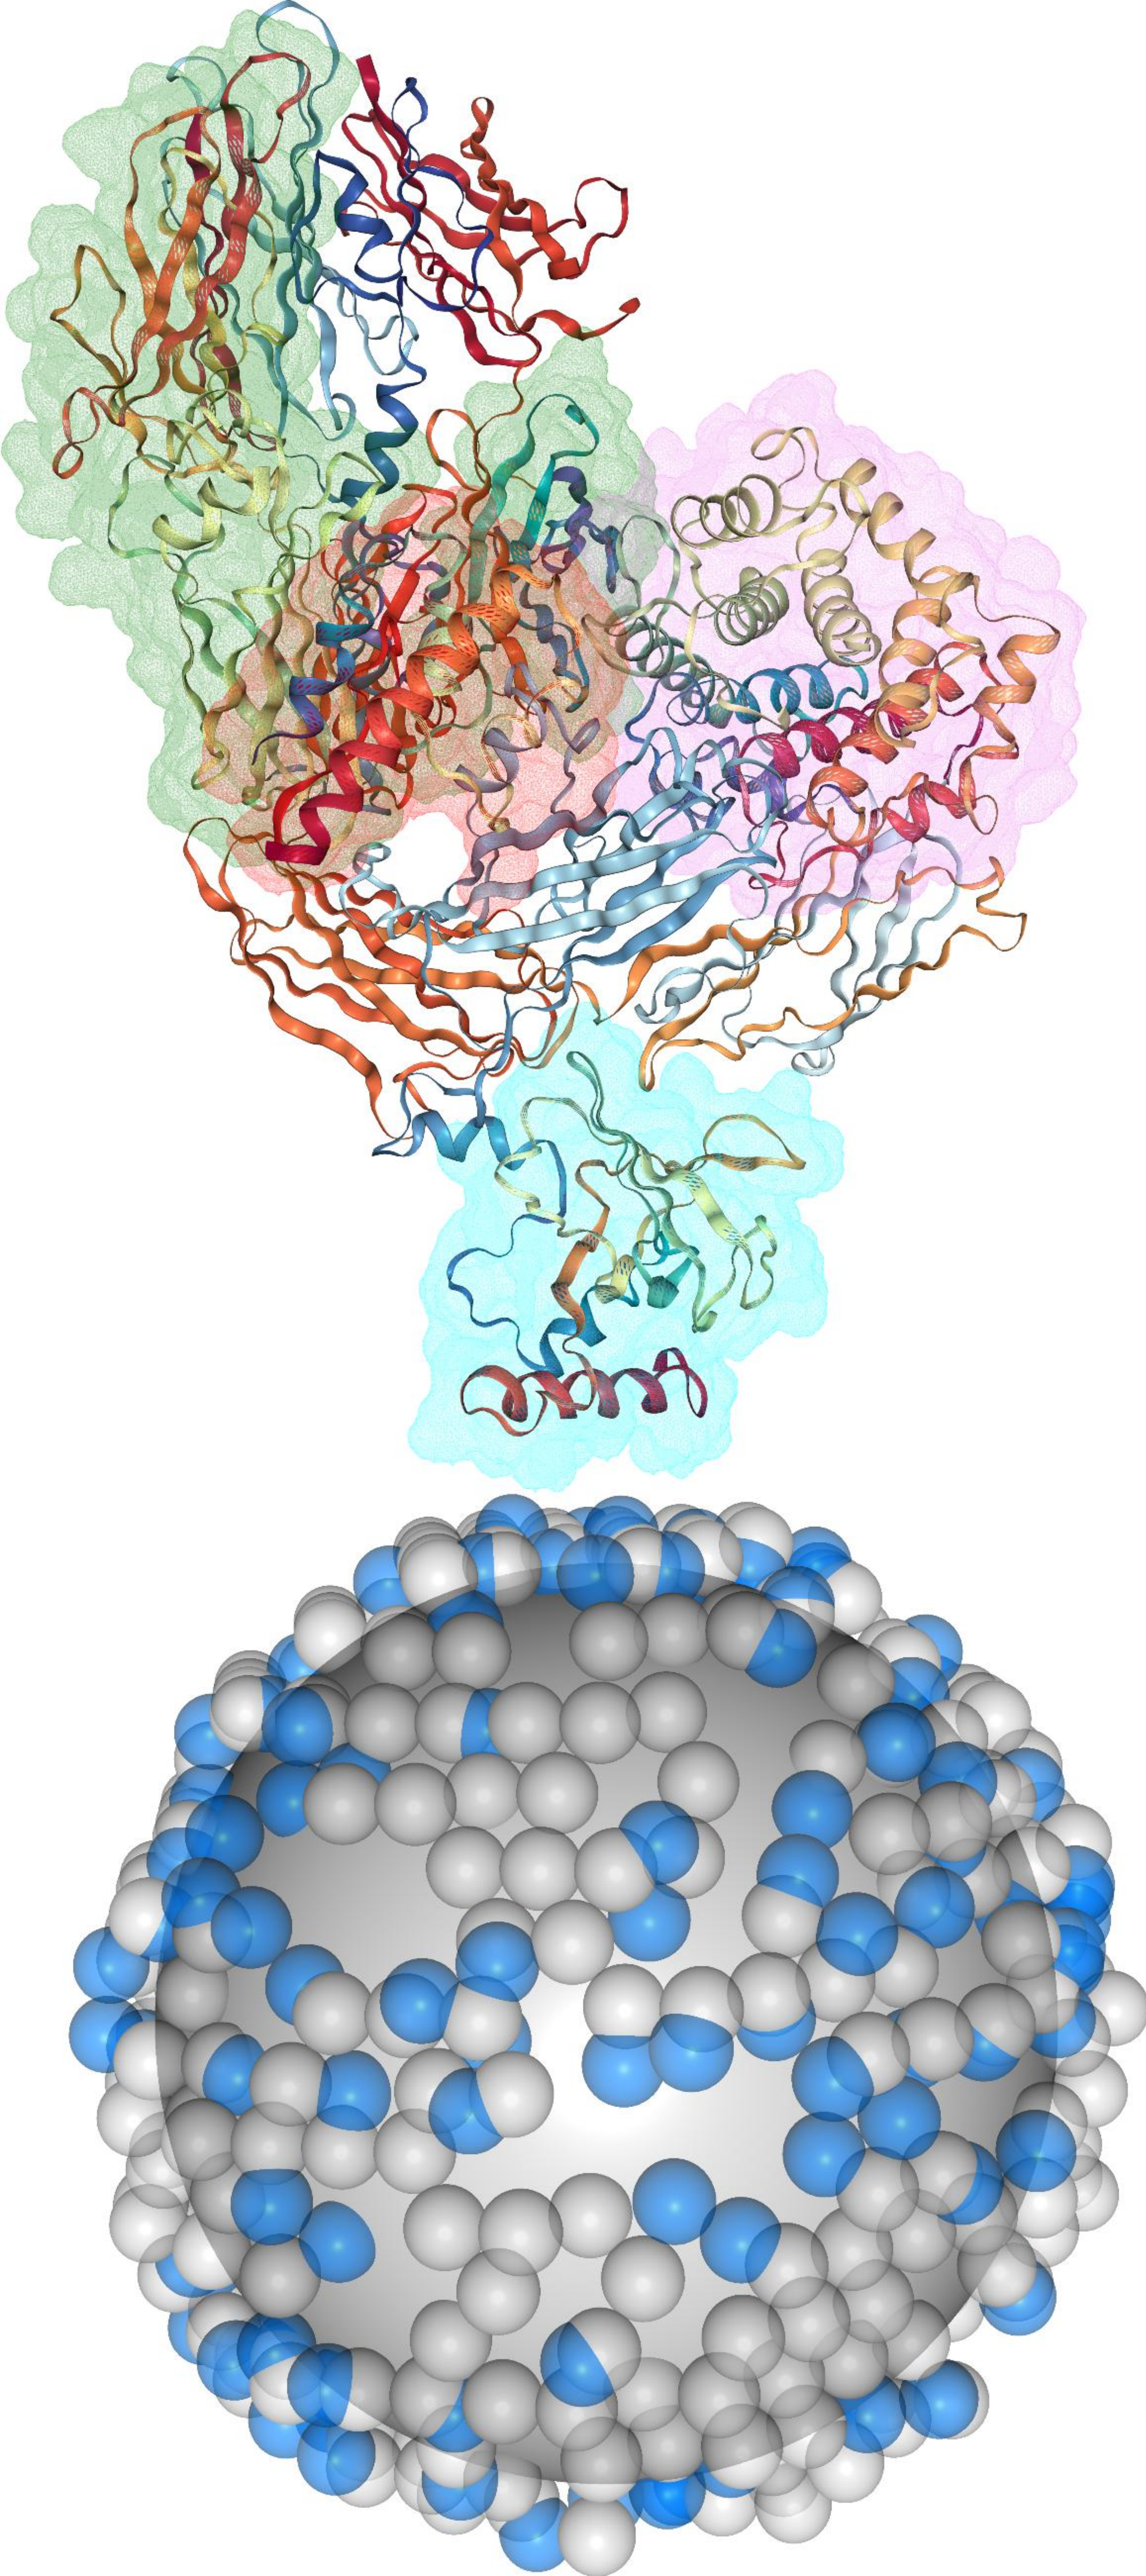

Supplement: d5en00784d1.zip [file psnh2_5nm_2a73_CG.pdf › fig_supp/complex/psnh2_5nm_2a73_CG.pdf]

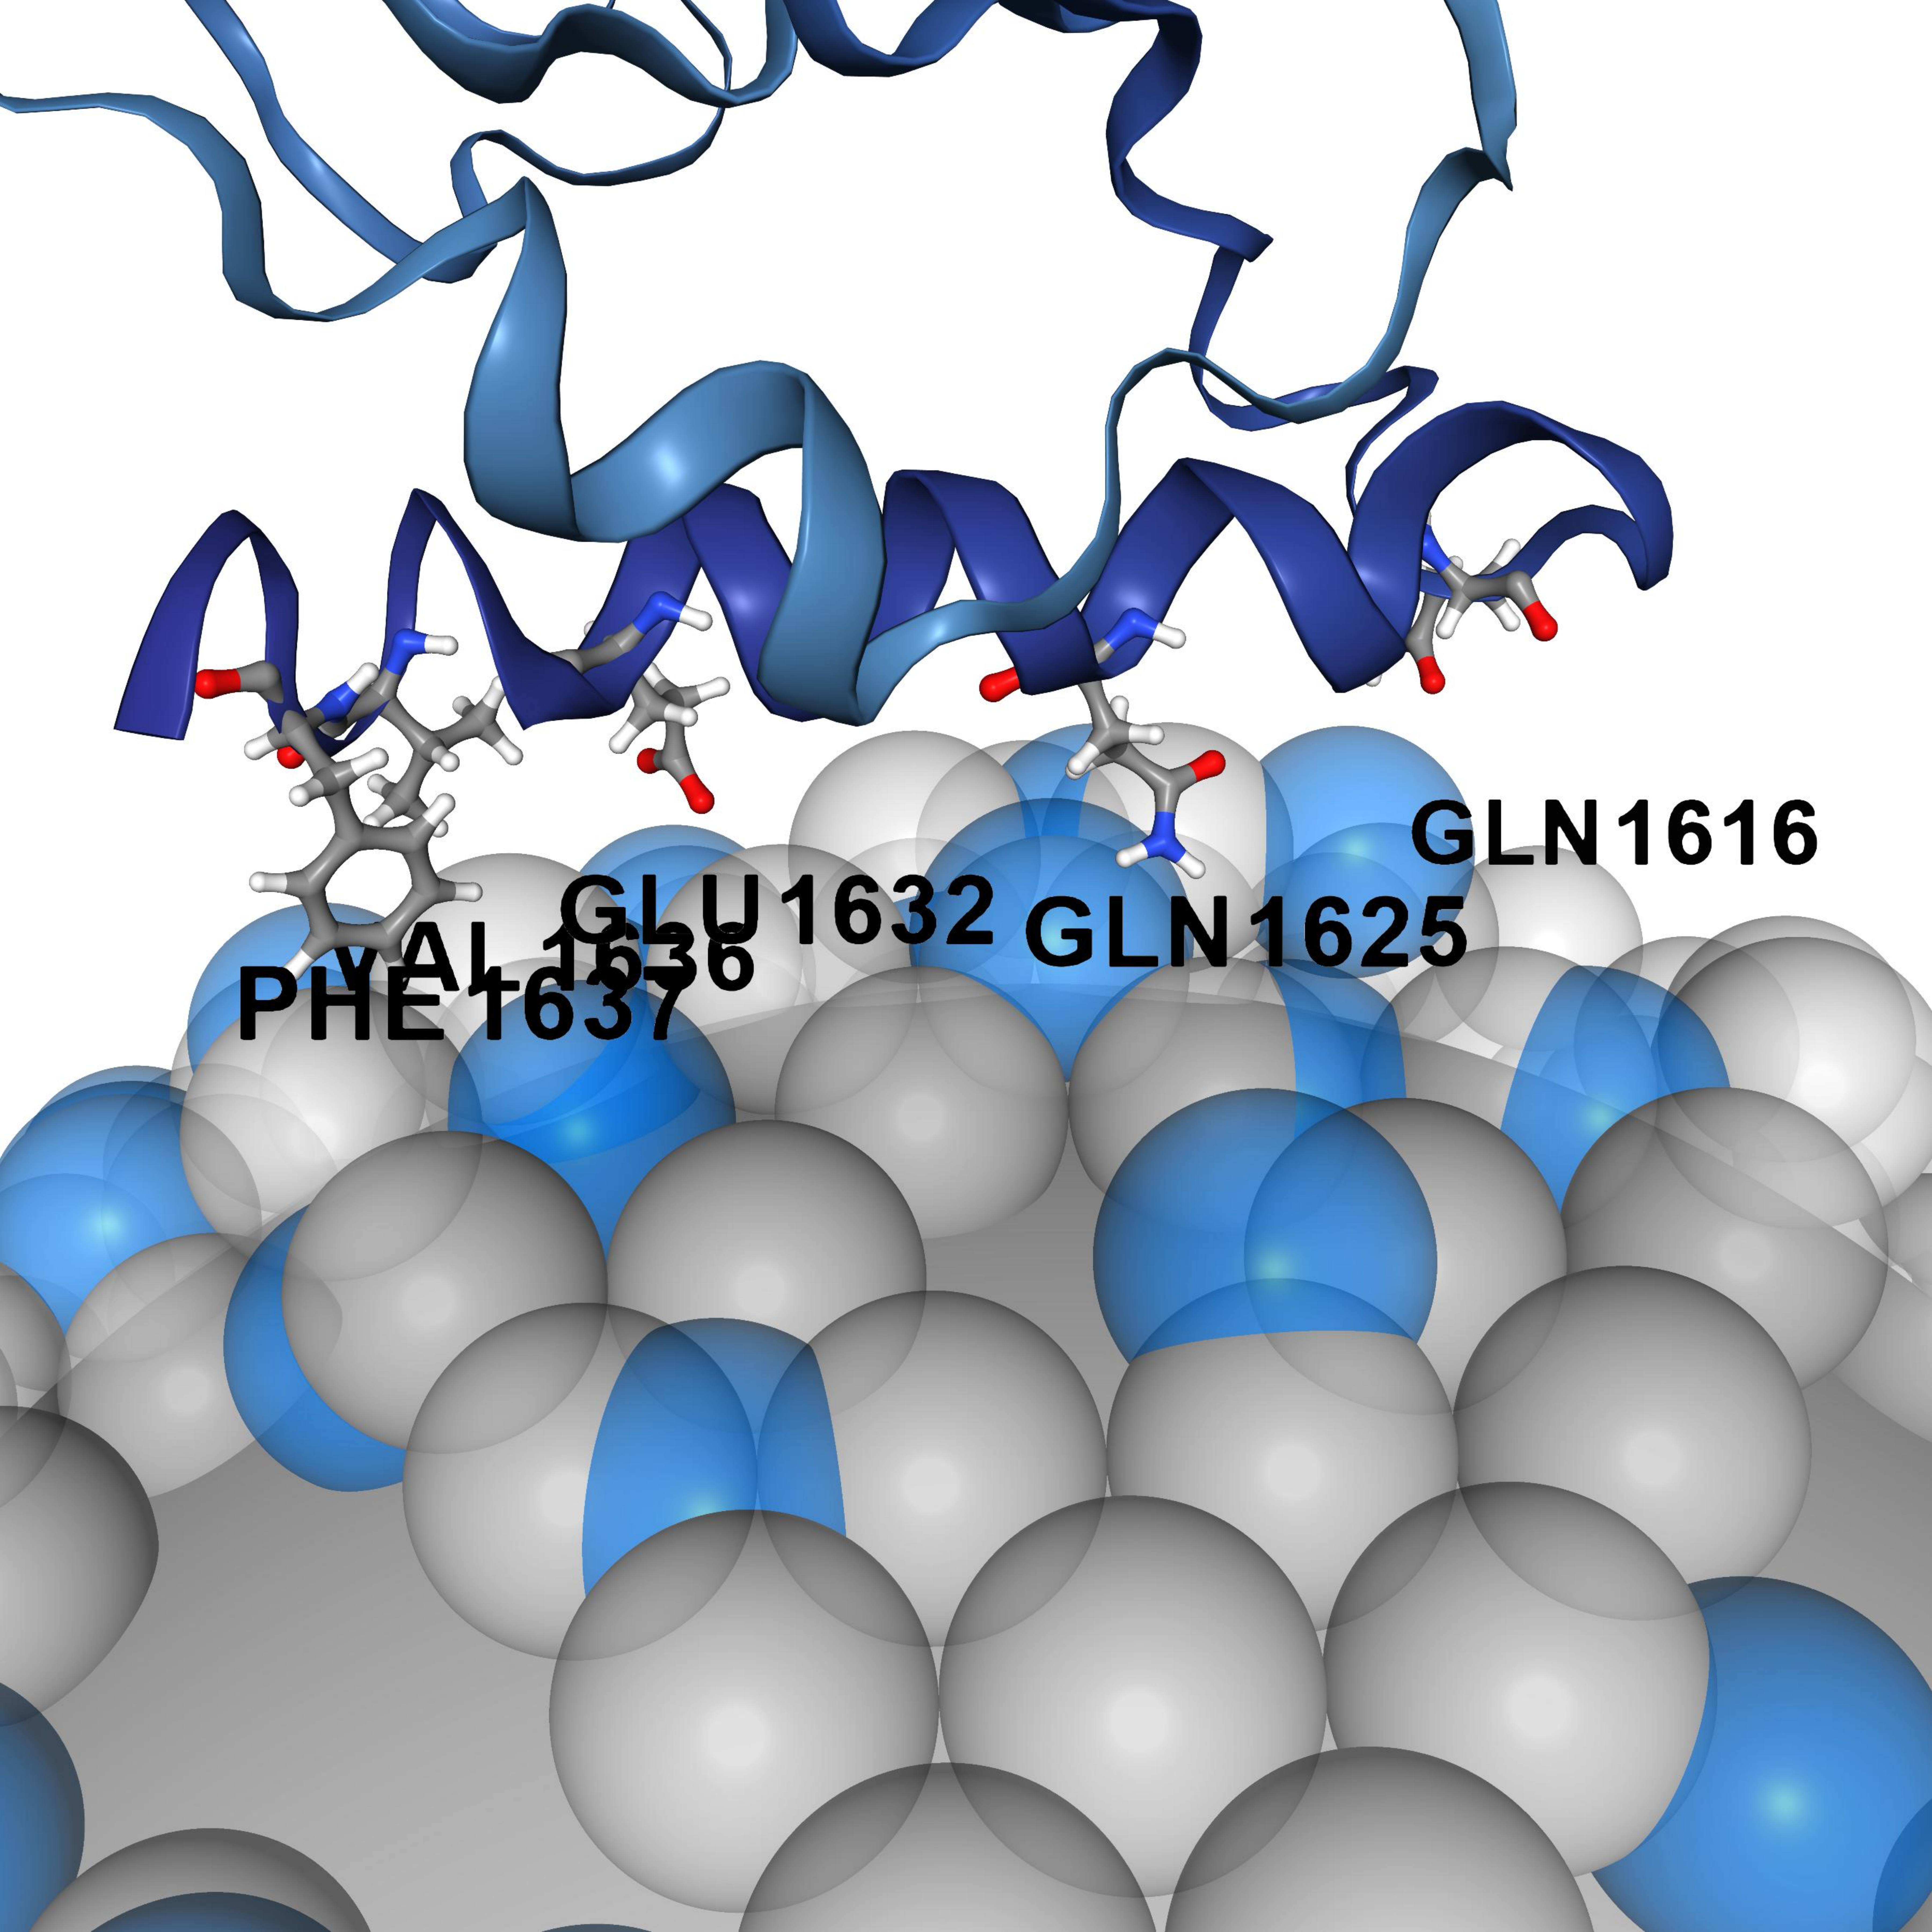

GLN1616  
GLU 1632  
GLN 1625  
VAL 1636  
PHE 1637

Supplement: d5en00784d1.zip [file psnh2_5nm_2a73_snap.pdf › fig_supp/complex/psnh2_5nm_2a73_snap.pdf]

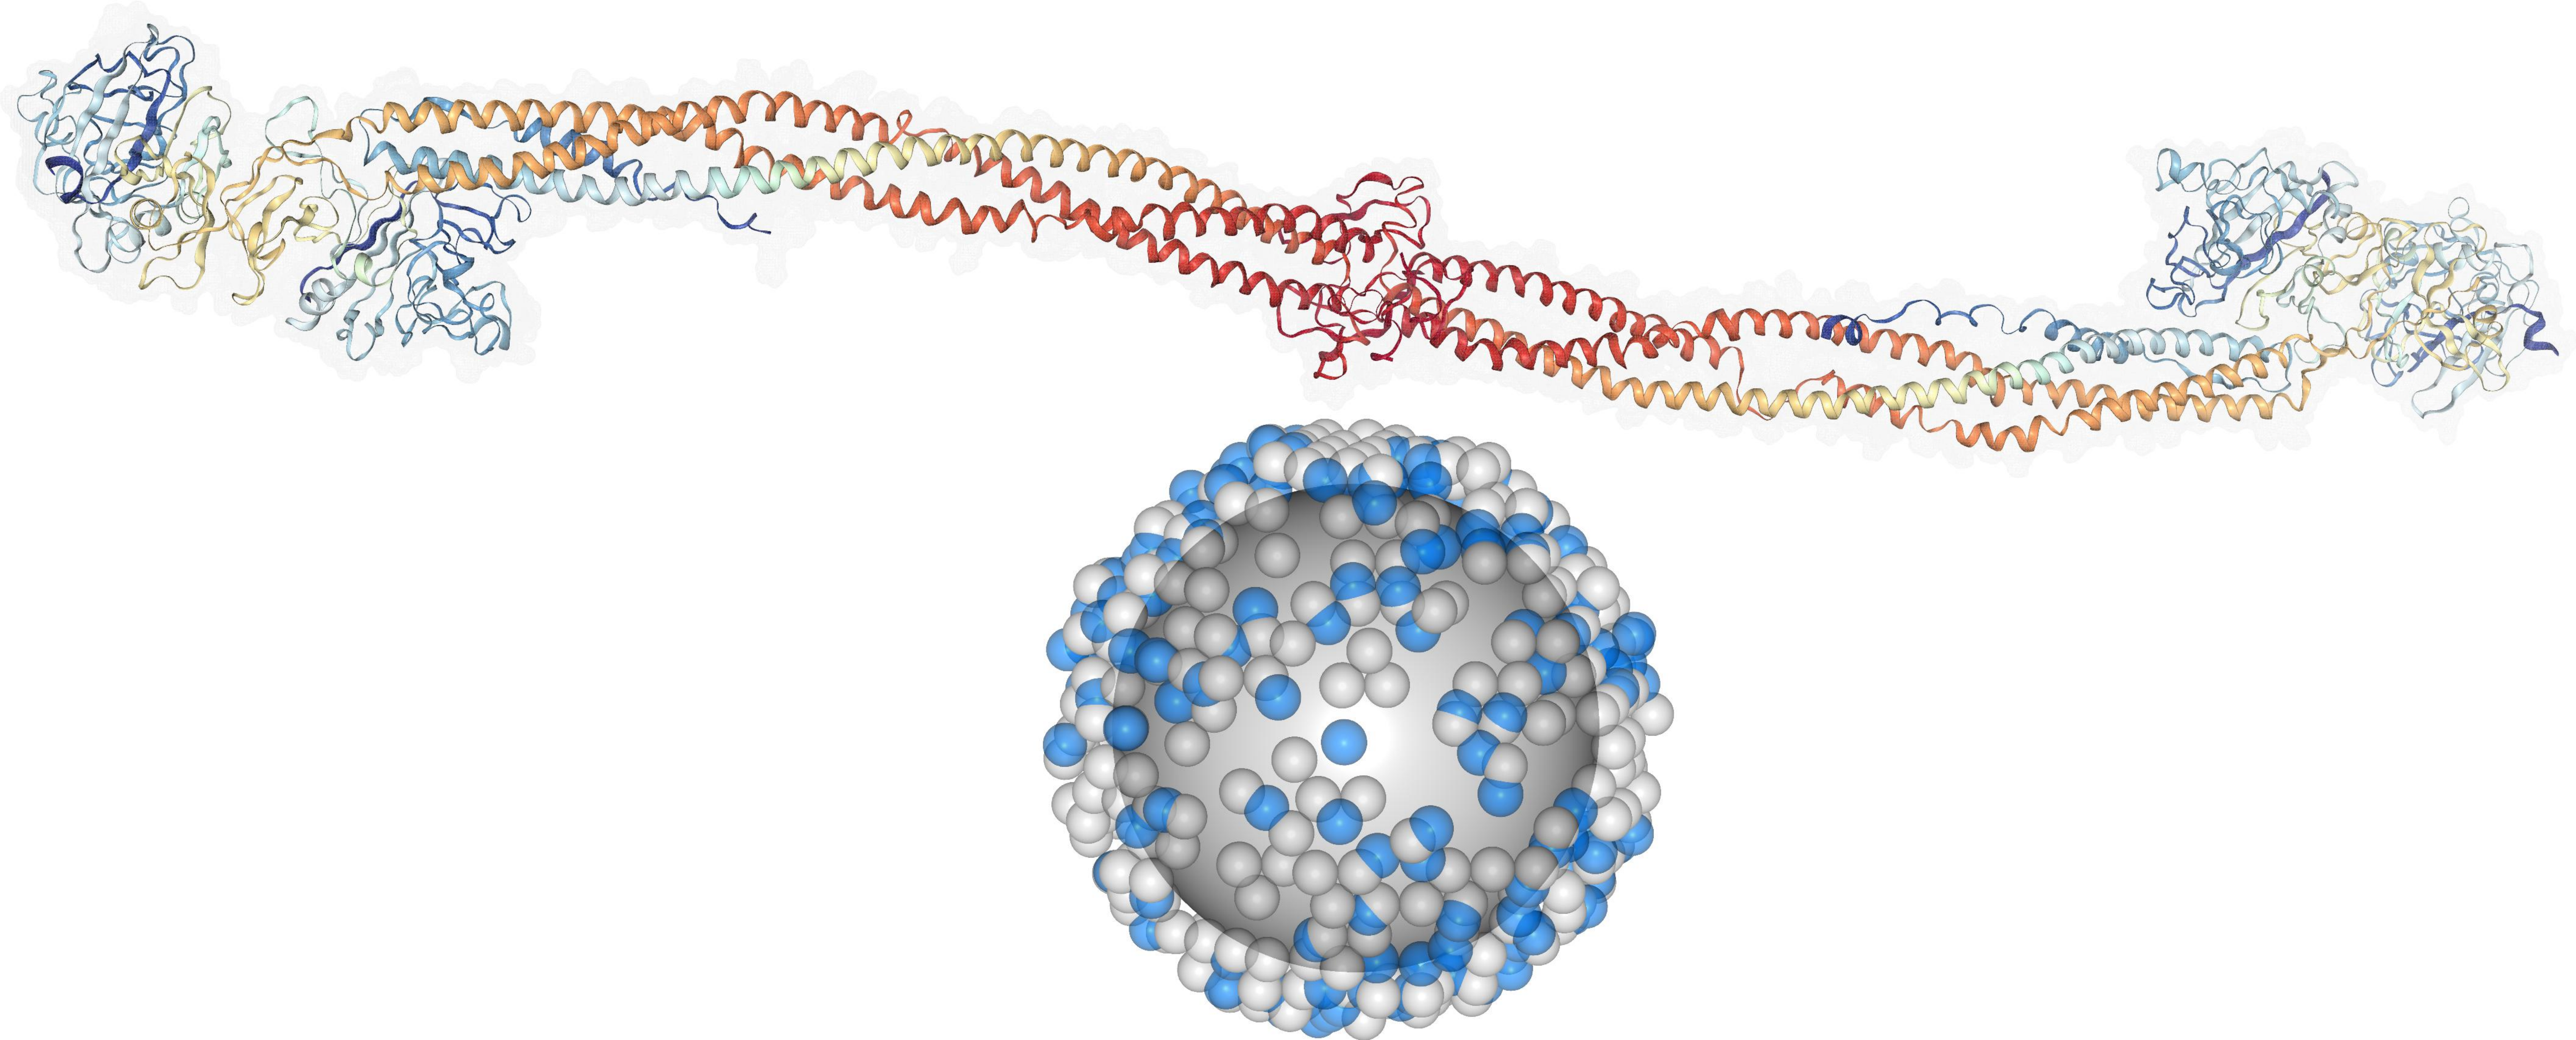

Supplement: d5en00784d1.zip [file psnh2_5nm_3ghg_CG.pdf › fig_supp/complex/psnh2_5nm_3ghg_CG.pdf]

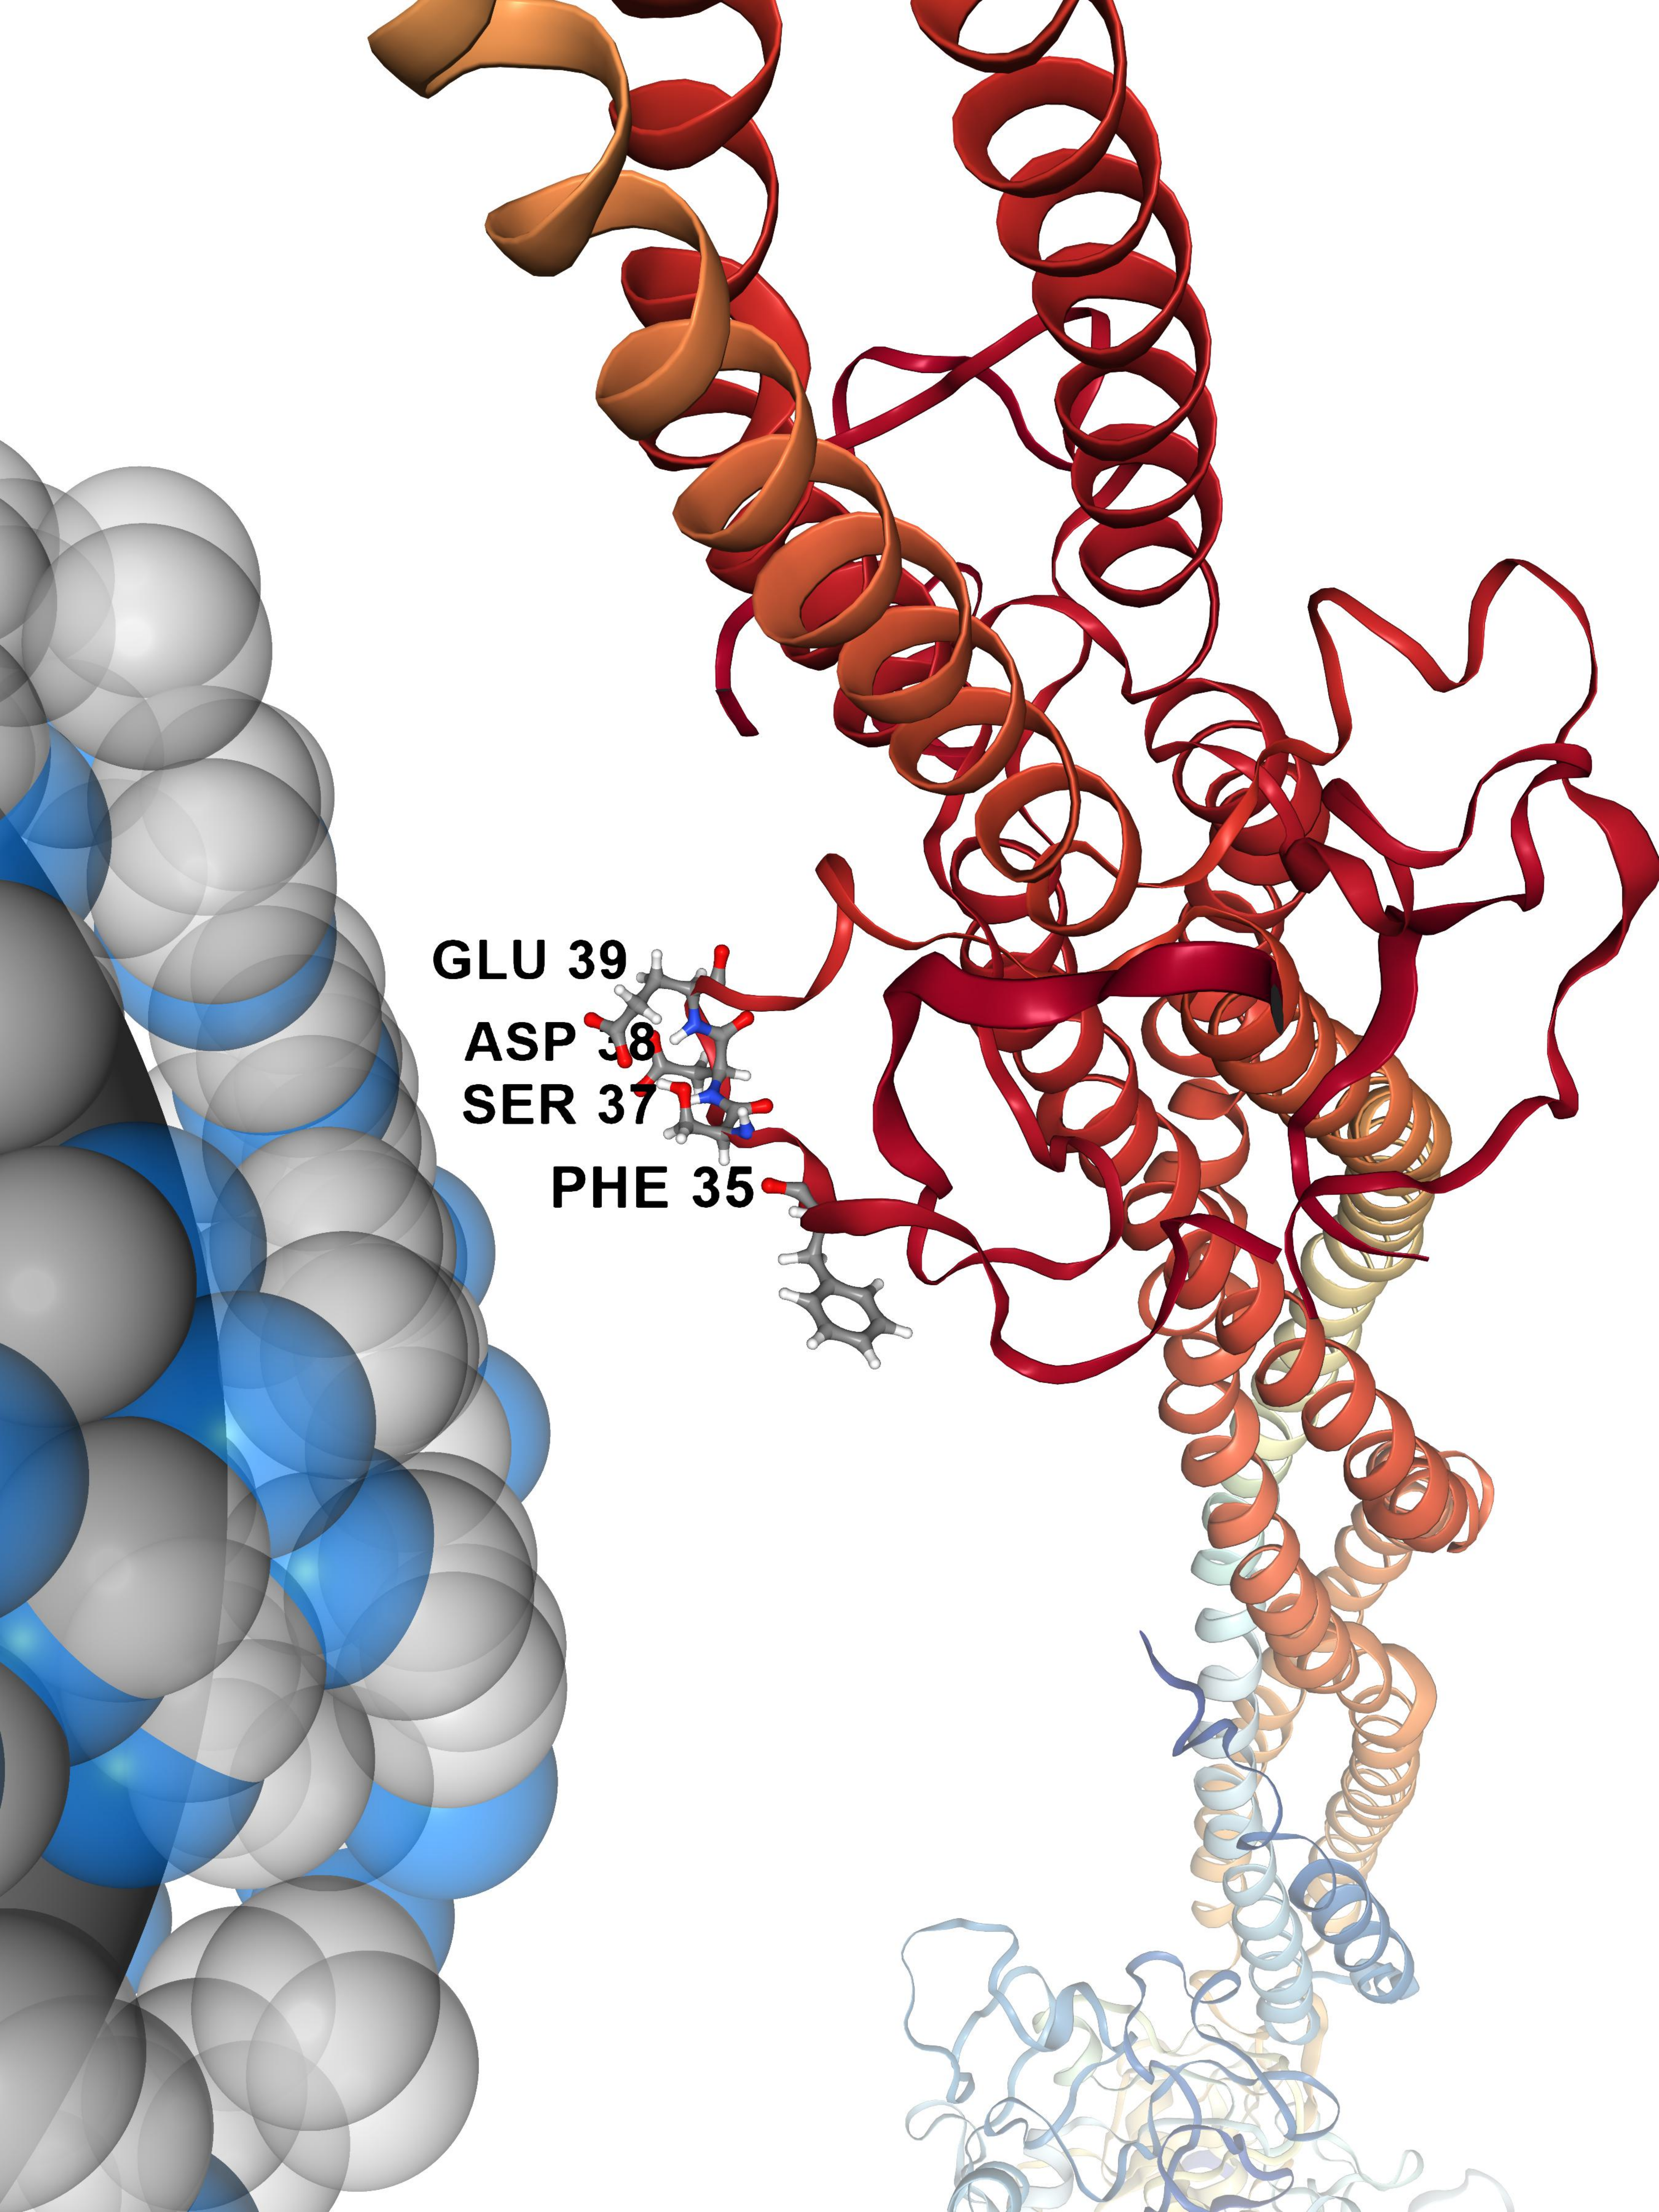

Supplement: d5en00784d1.zip [file psnh2_5nm_3ghg_snap.pdf › fig_supp/complex/psnh2_5nm_3ghg_snap.pdf]

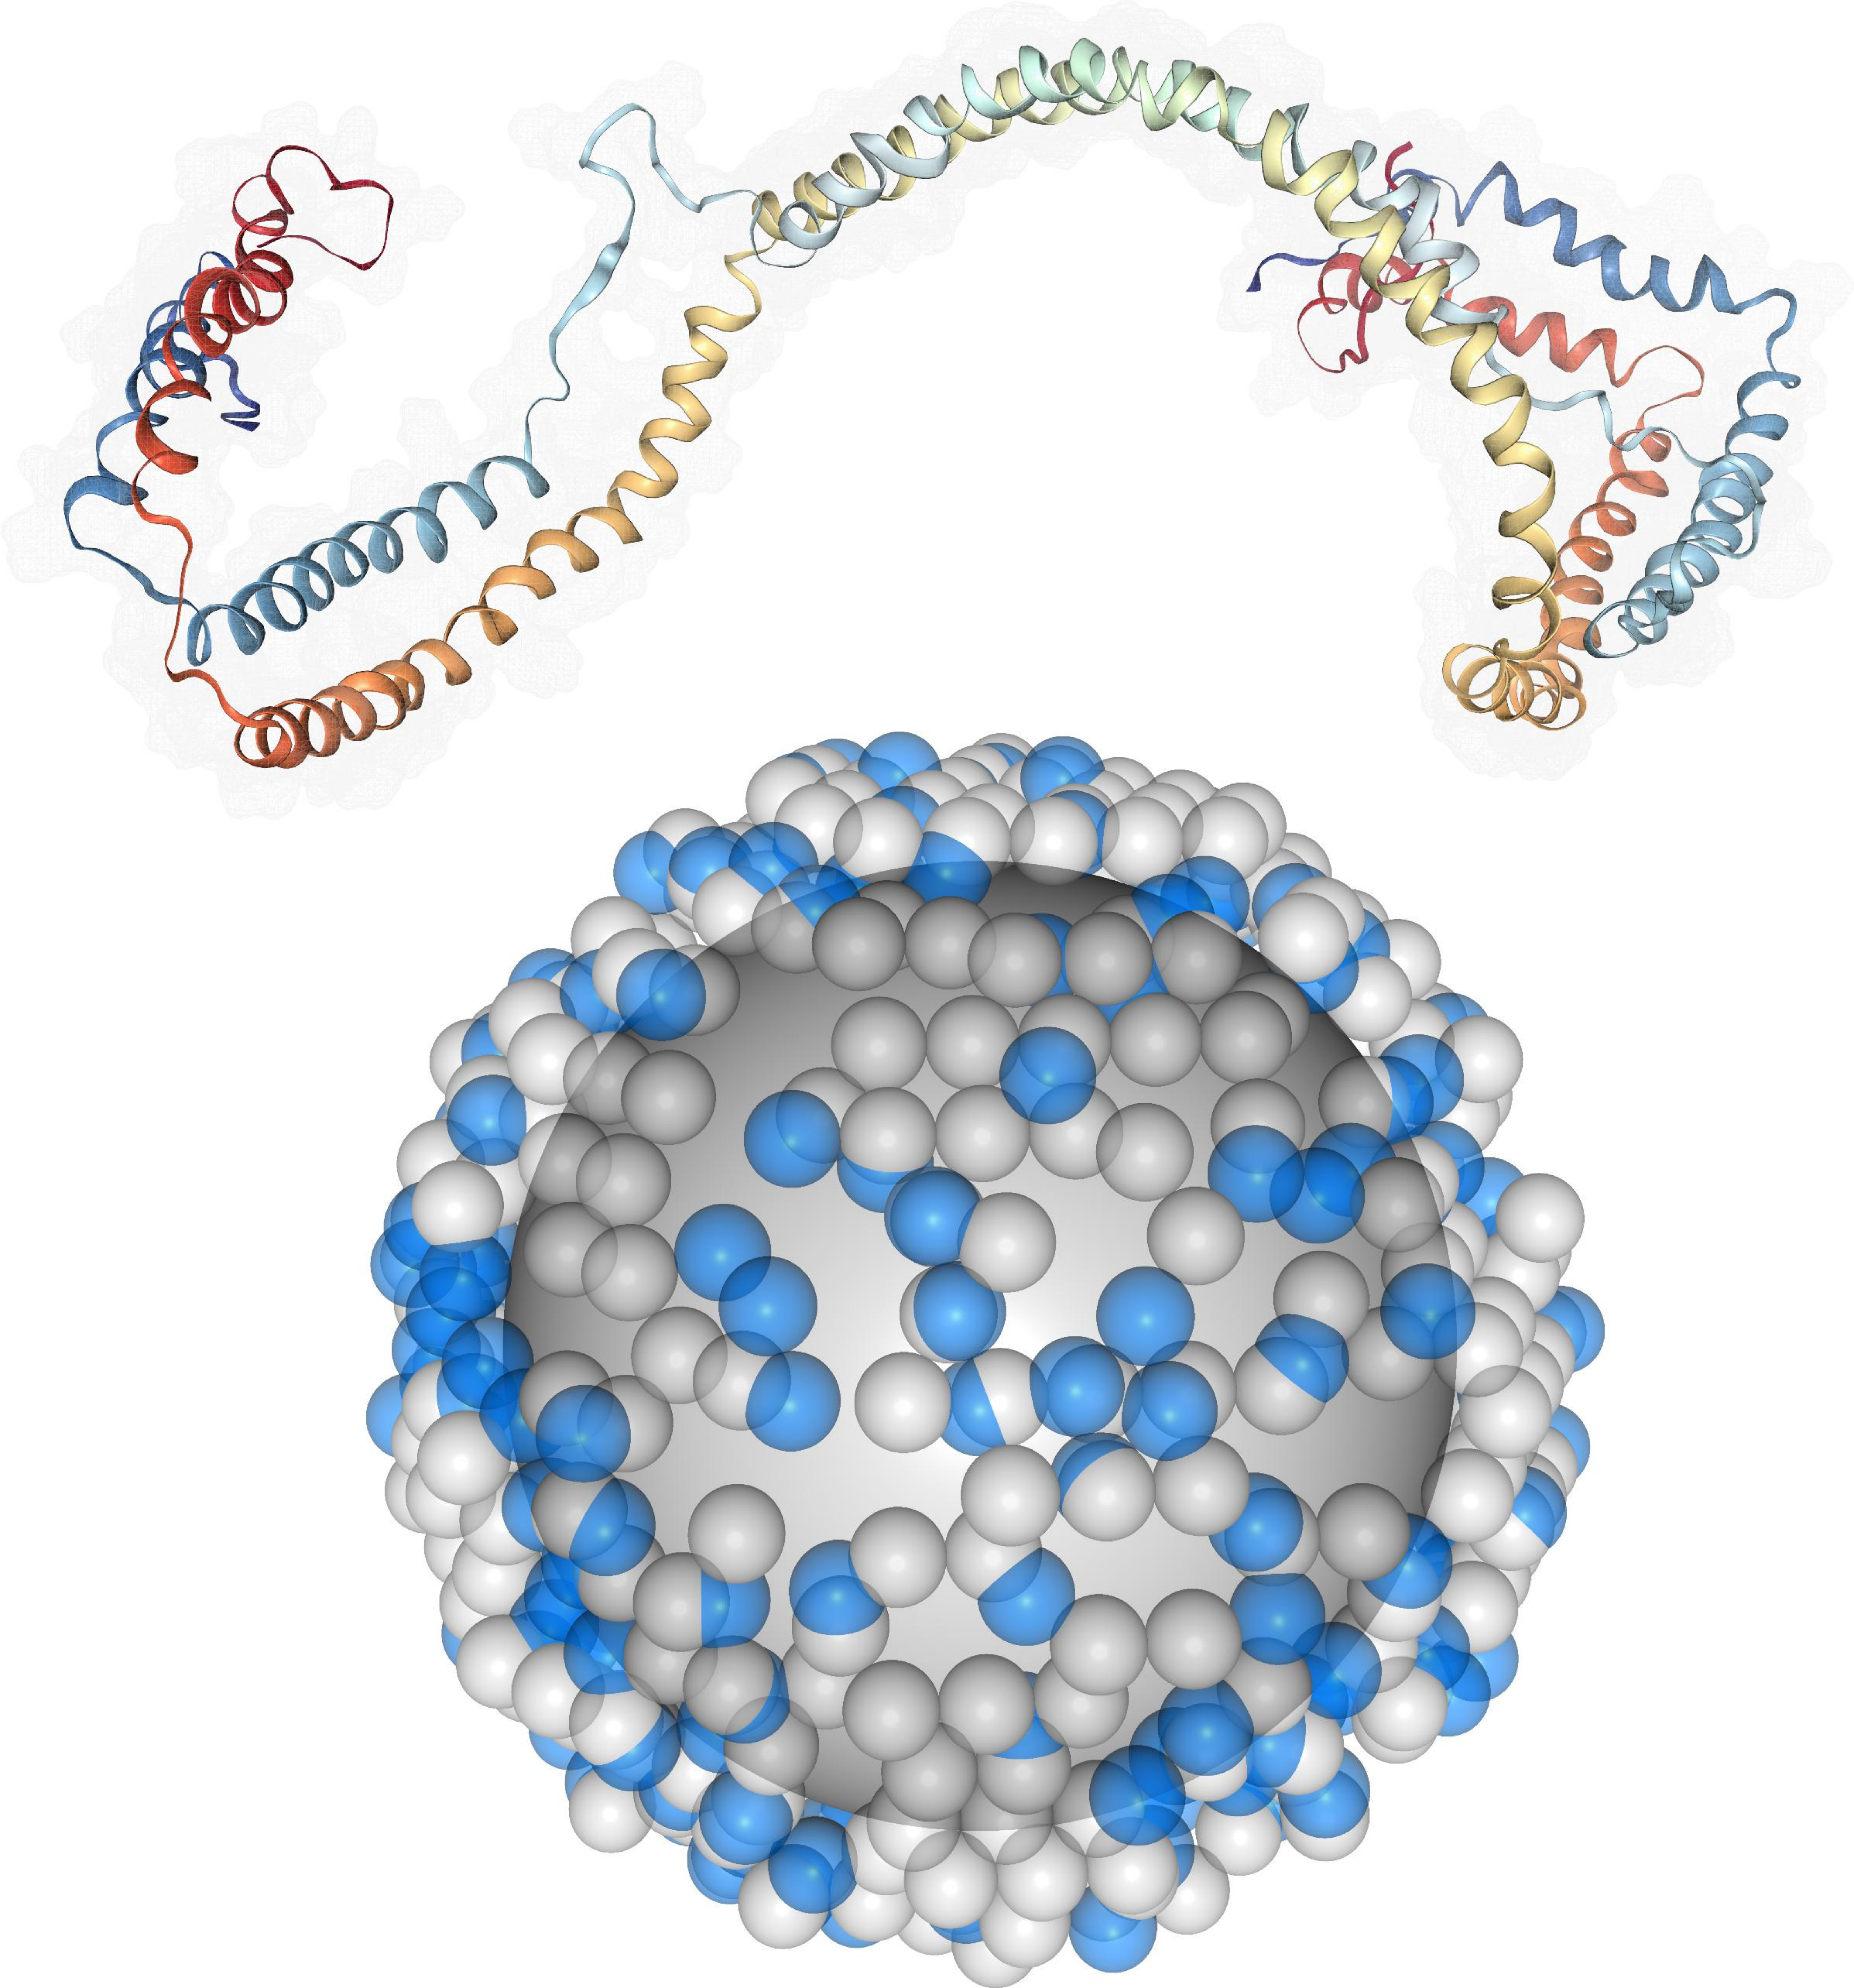

Supplement: d5en00784d1.zip [file psnh2_5nm_3k2s_CG.pdf › fig_supp/complex/psnh2_5nm_3k2s_CG.pdf]

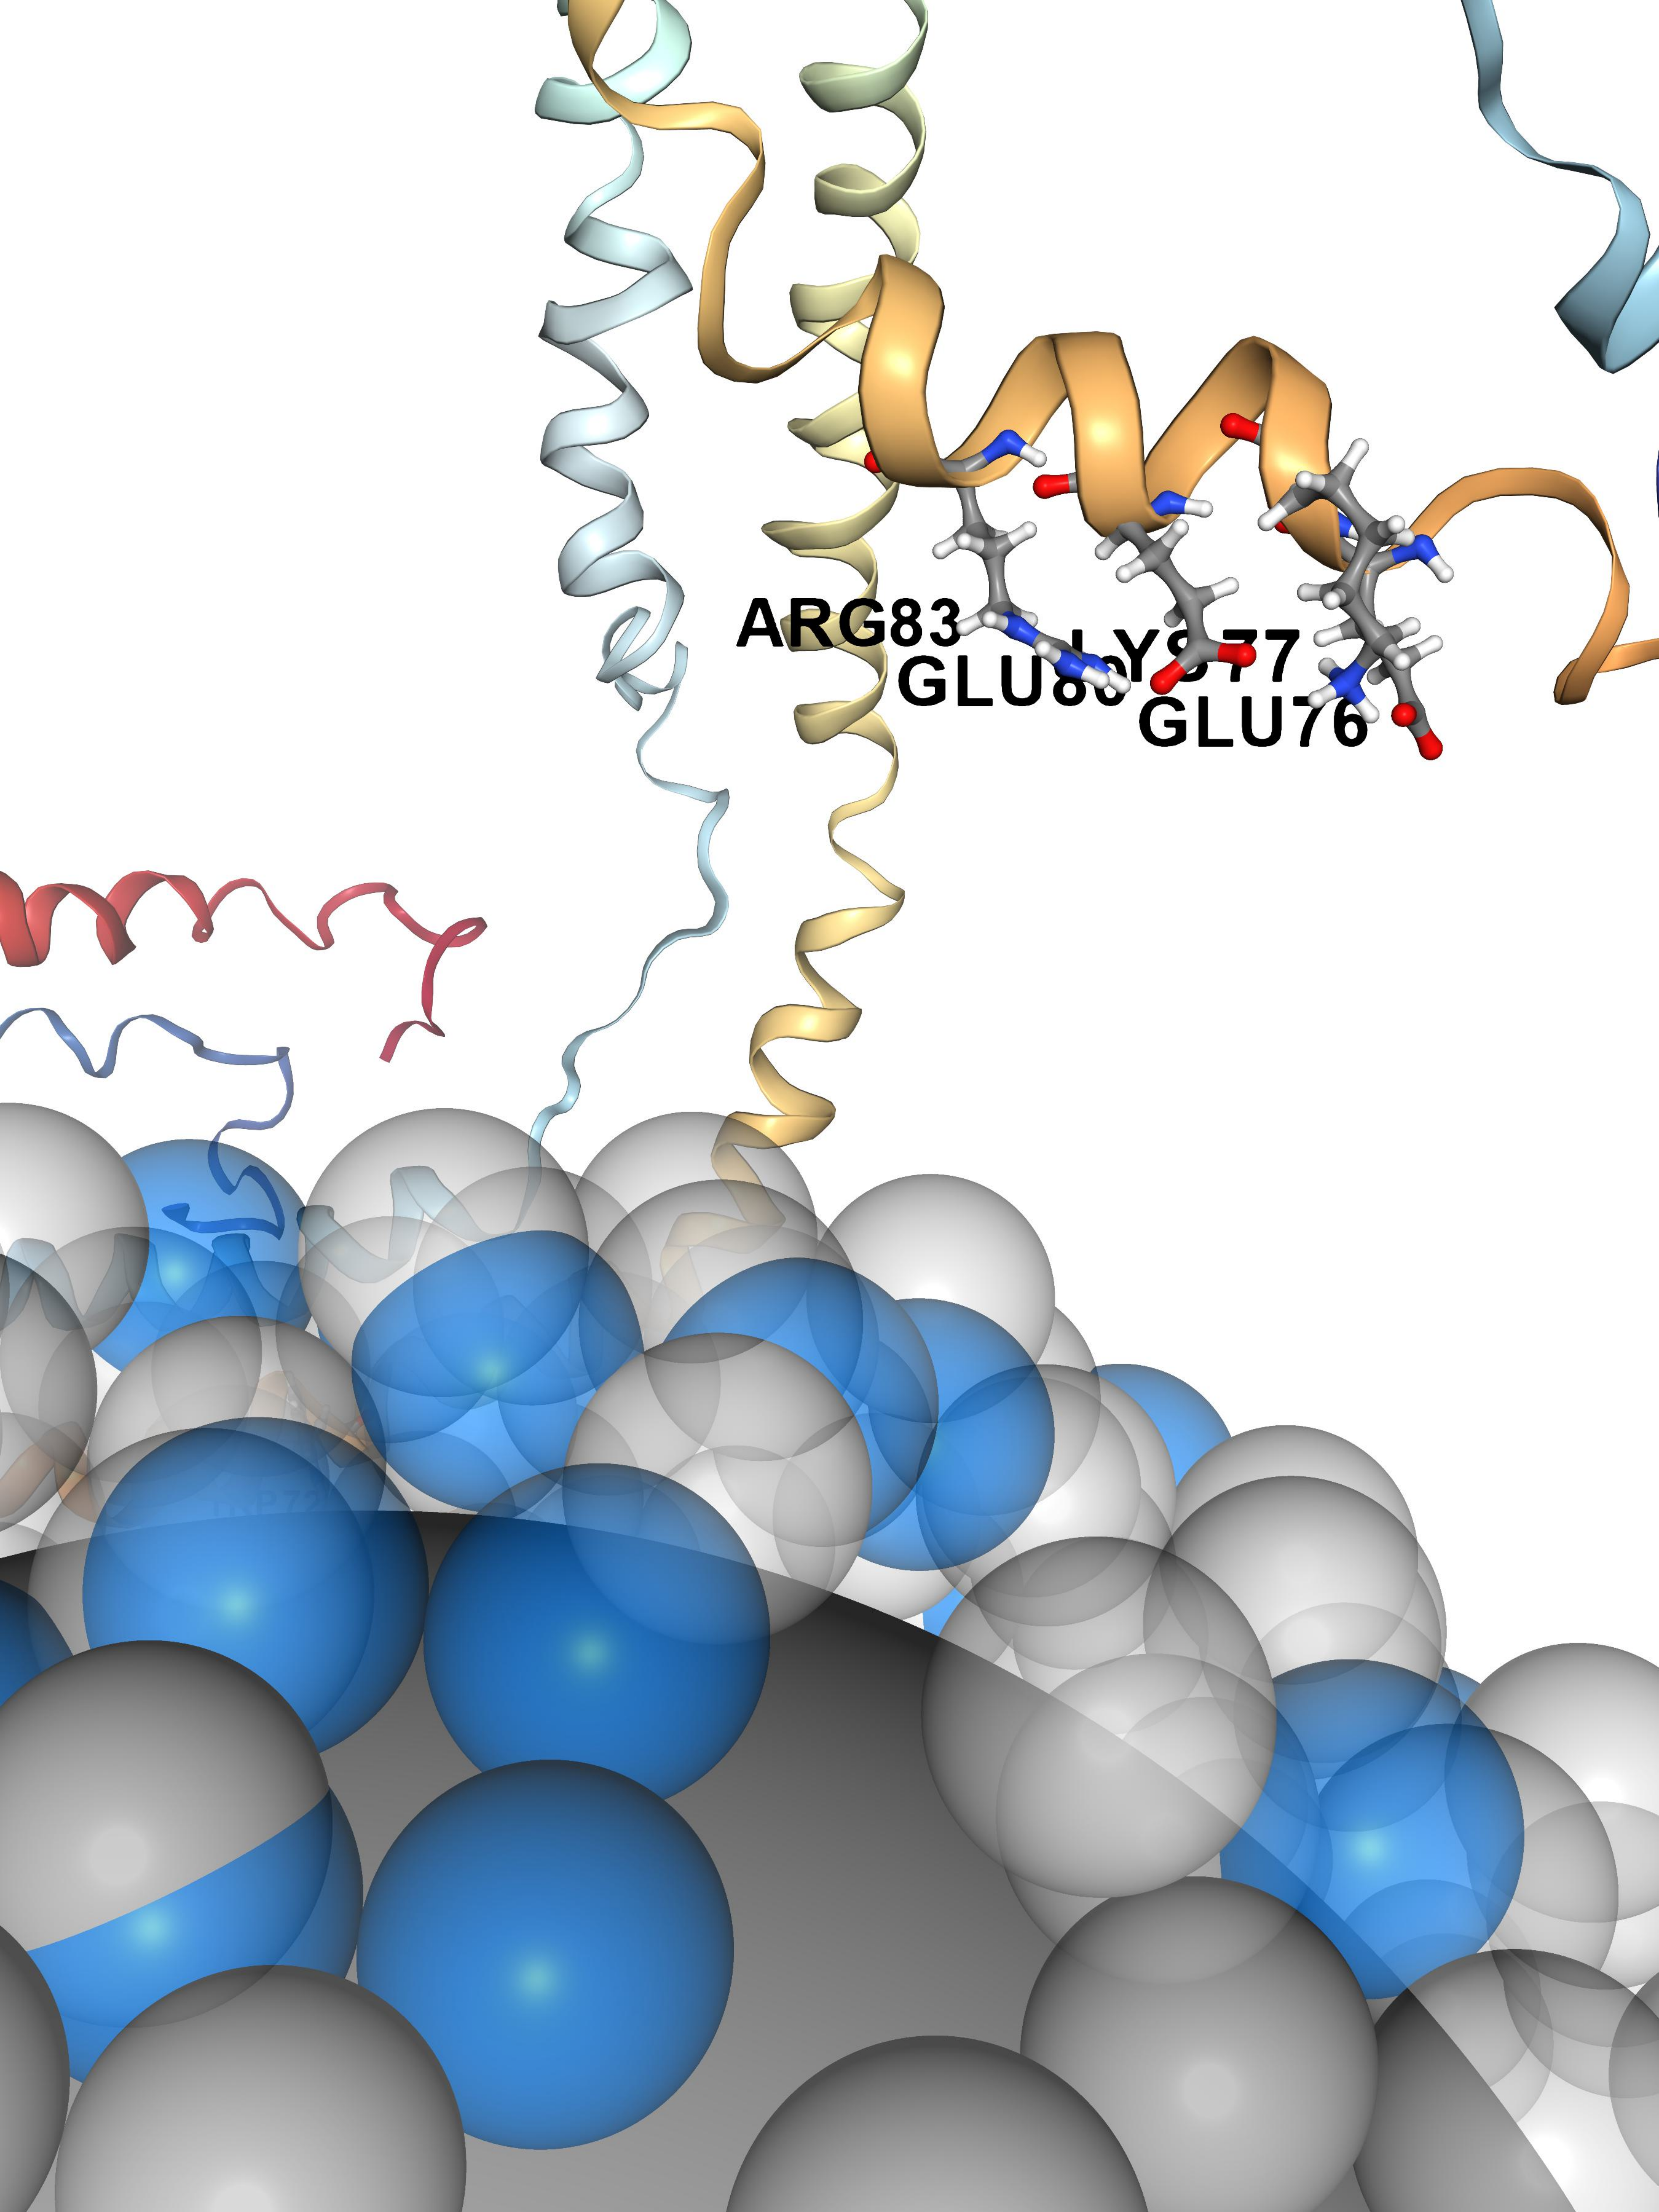

Supplement: d5en00784d1.zip [file psnh2_5nm_3k2s_snap.pdf › fig_supp/complex/psnh2_5nm_3k2s_snap.pdf]

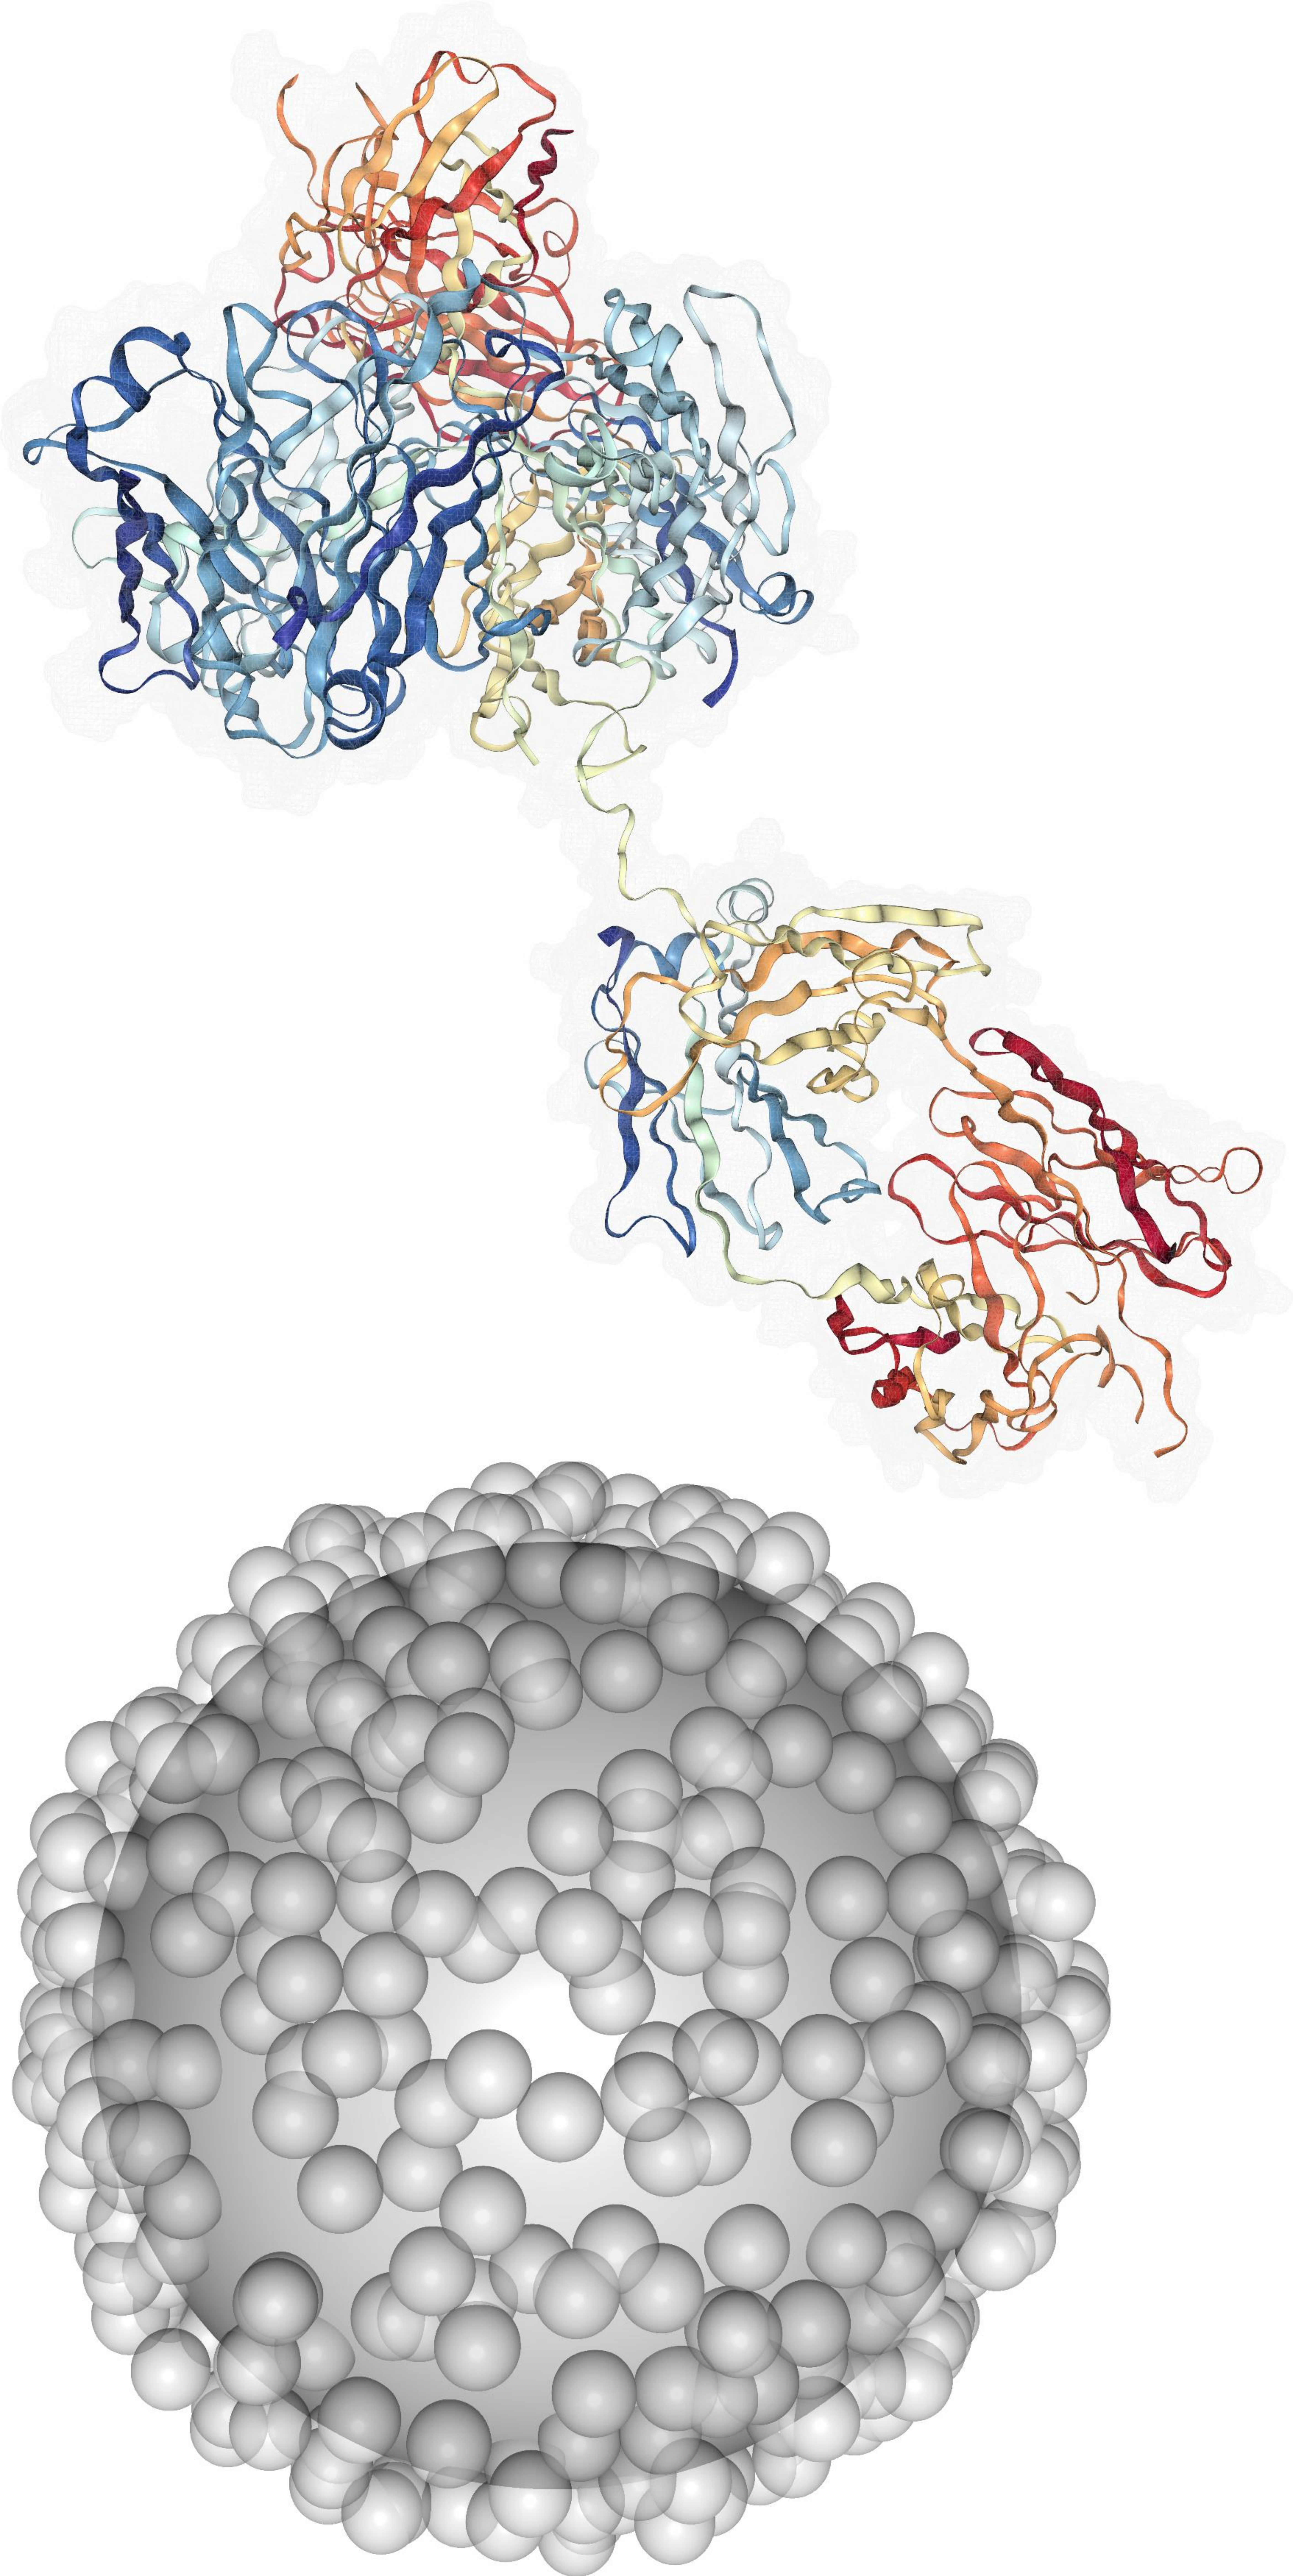

Supplement: d5en00784d1.zip [file psps_5nm_1hzh_CG.pdf › fig_supp/complex/psps_5nm_1hzh_CG.pdf]

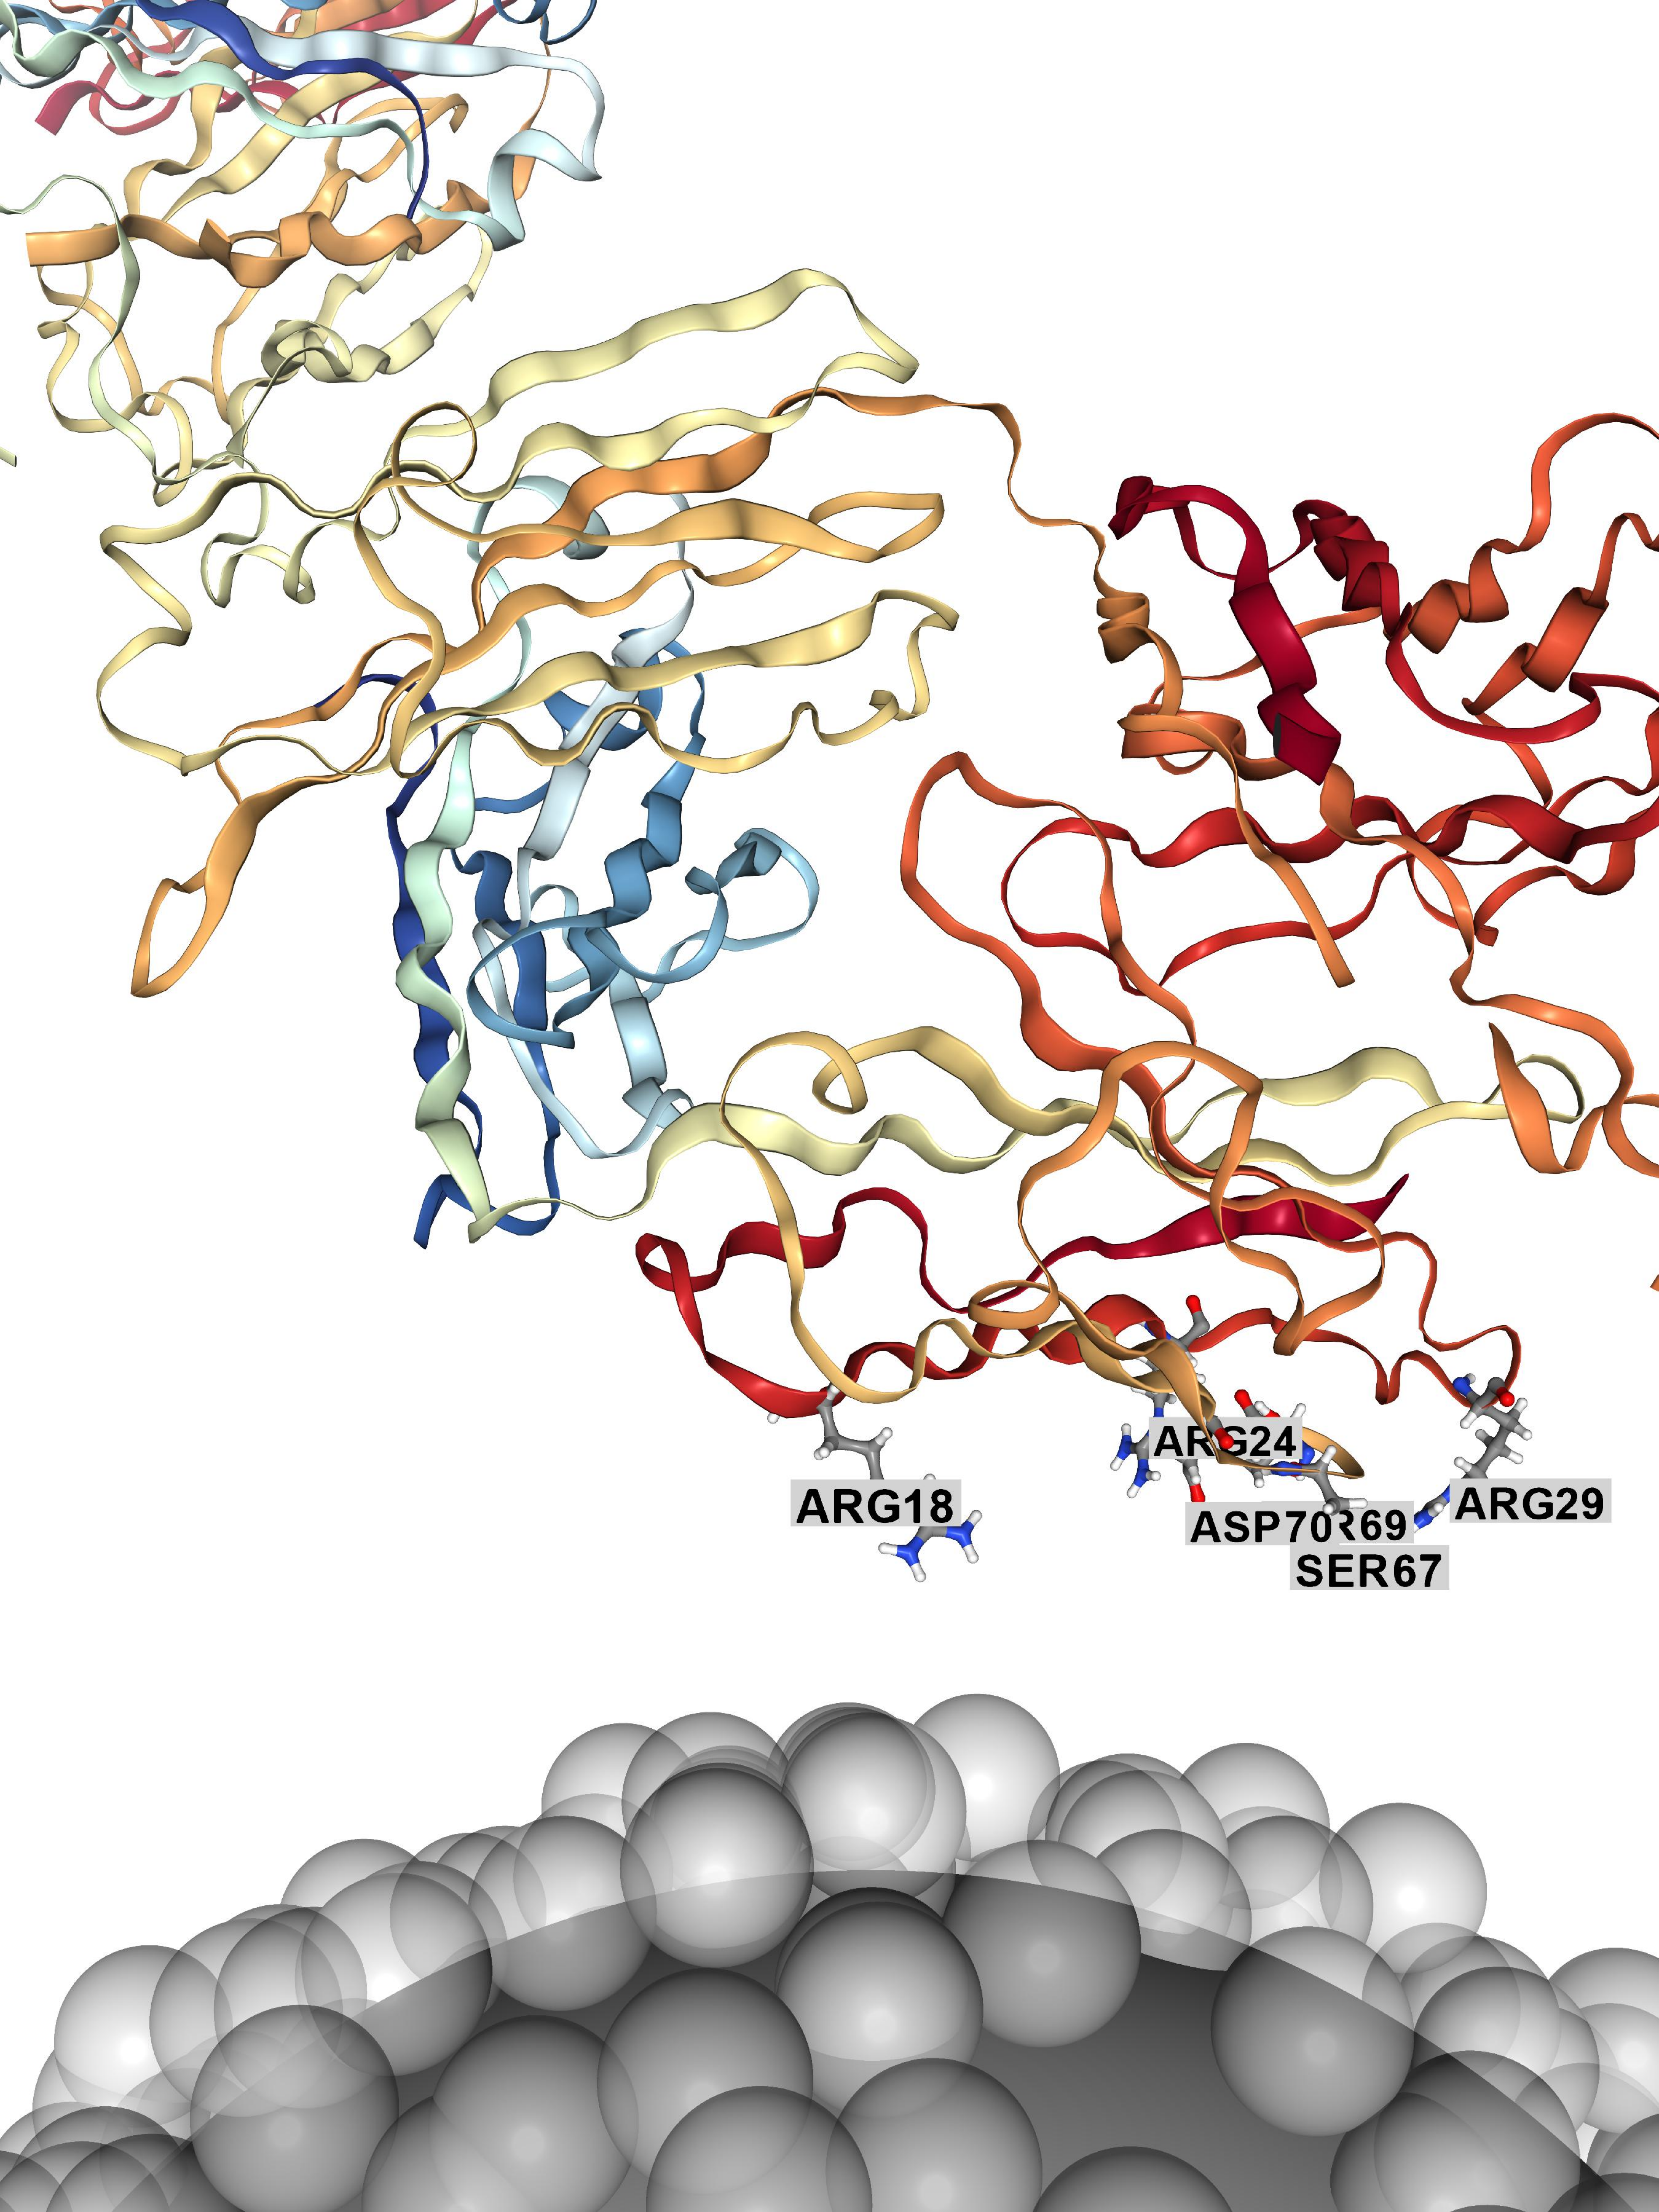

Supplement: d5en00784d1.zip [file psps_5nm_1hzh_snap.pdf › fig_supp/complex/psps_5nm_1hzh_snap.pdf]

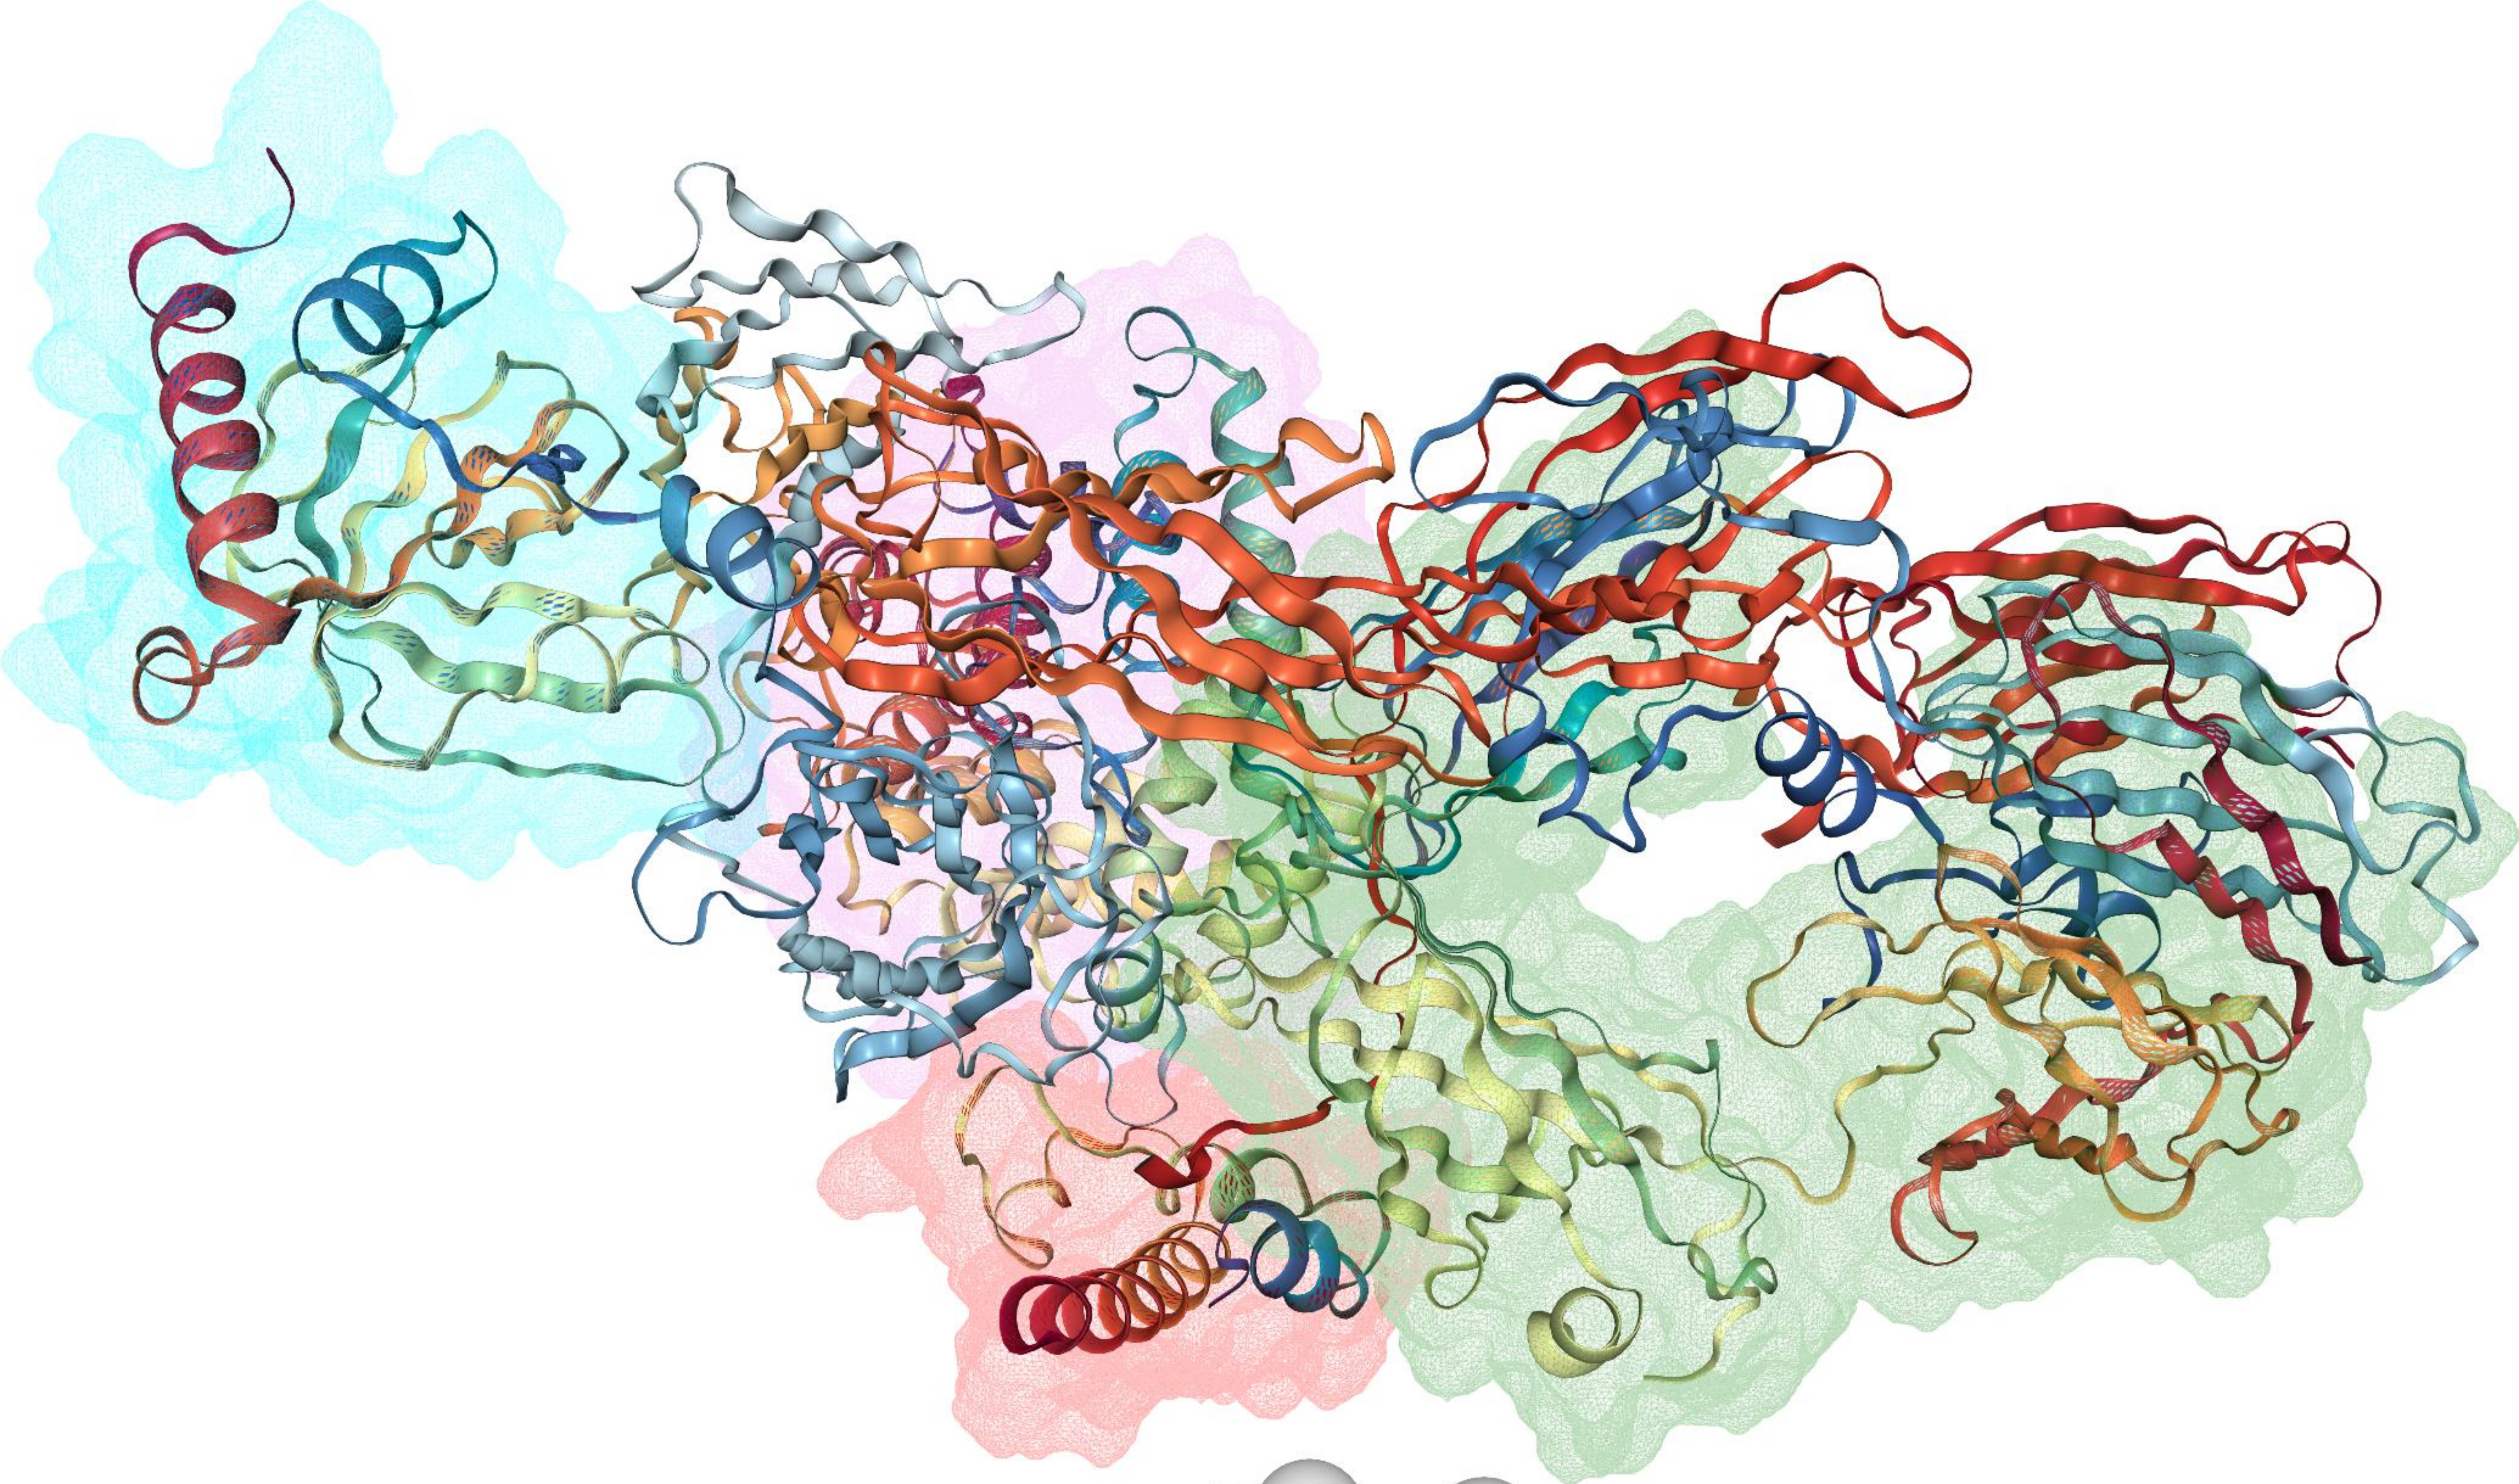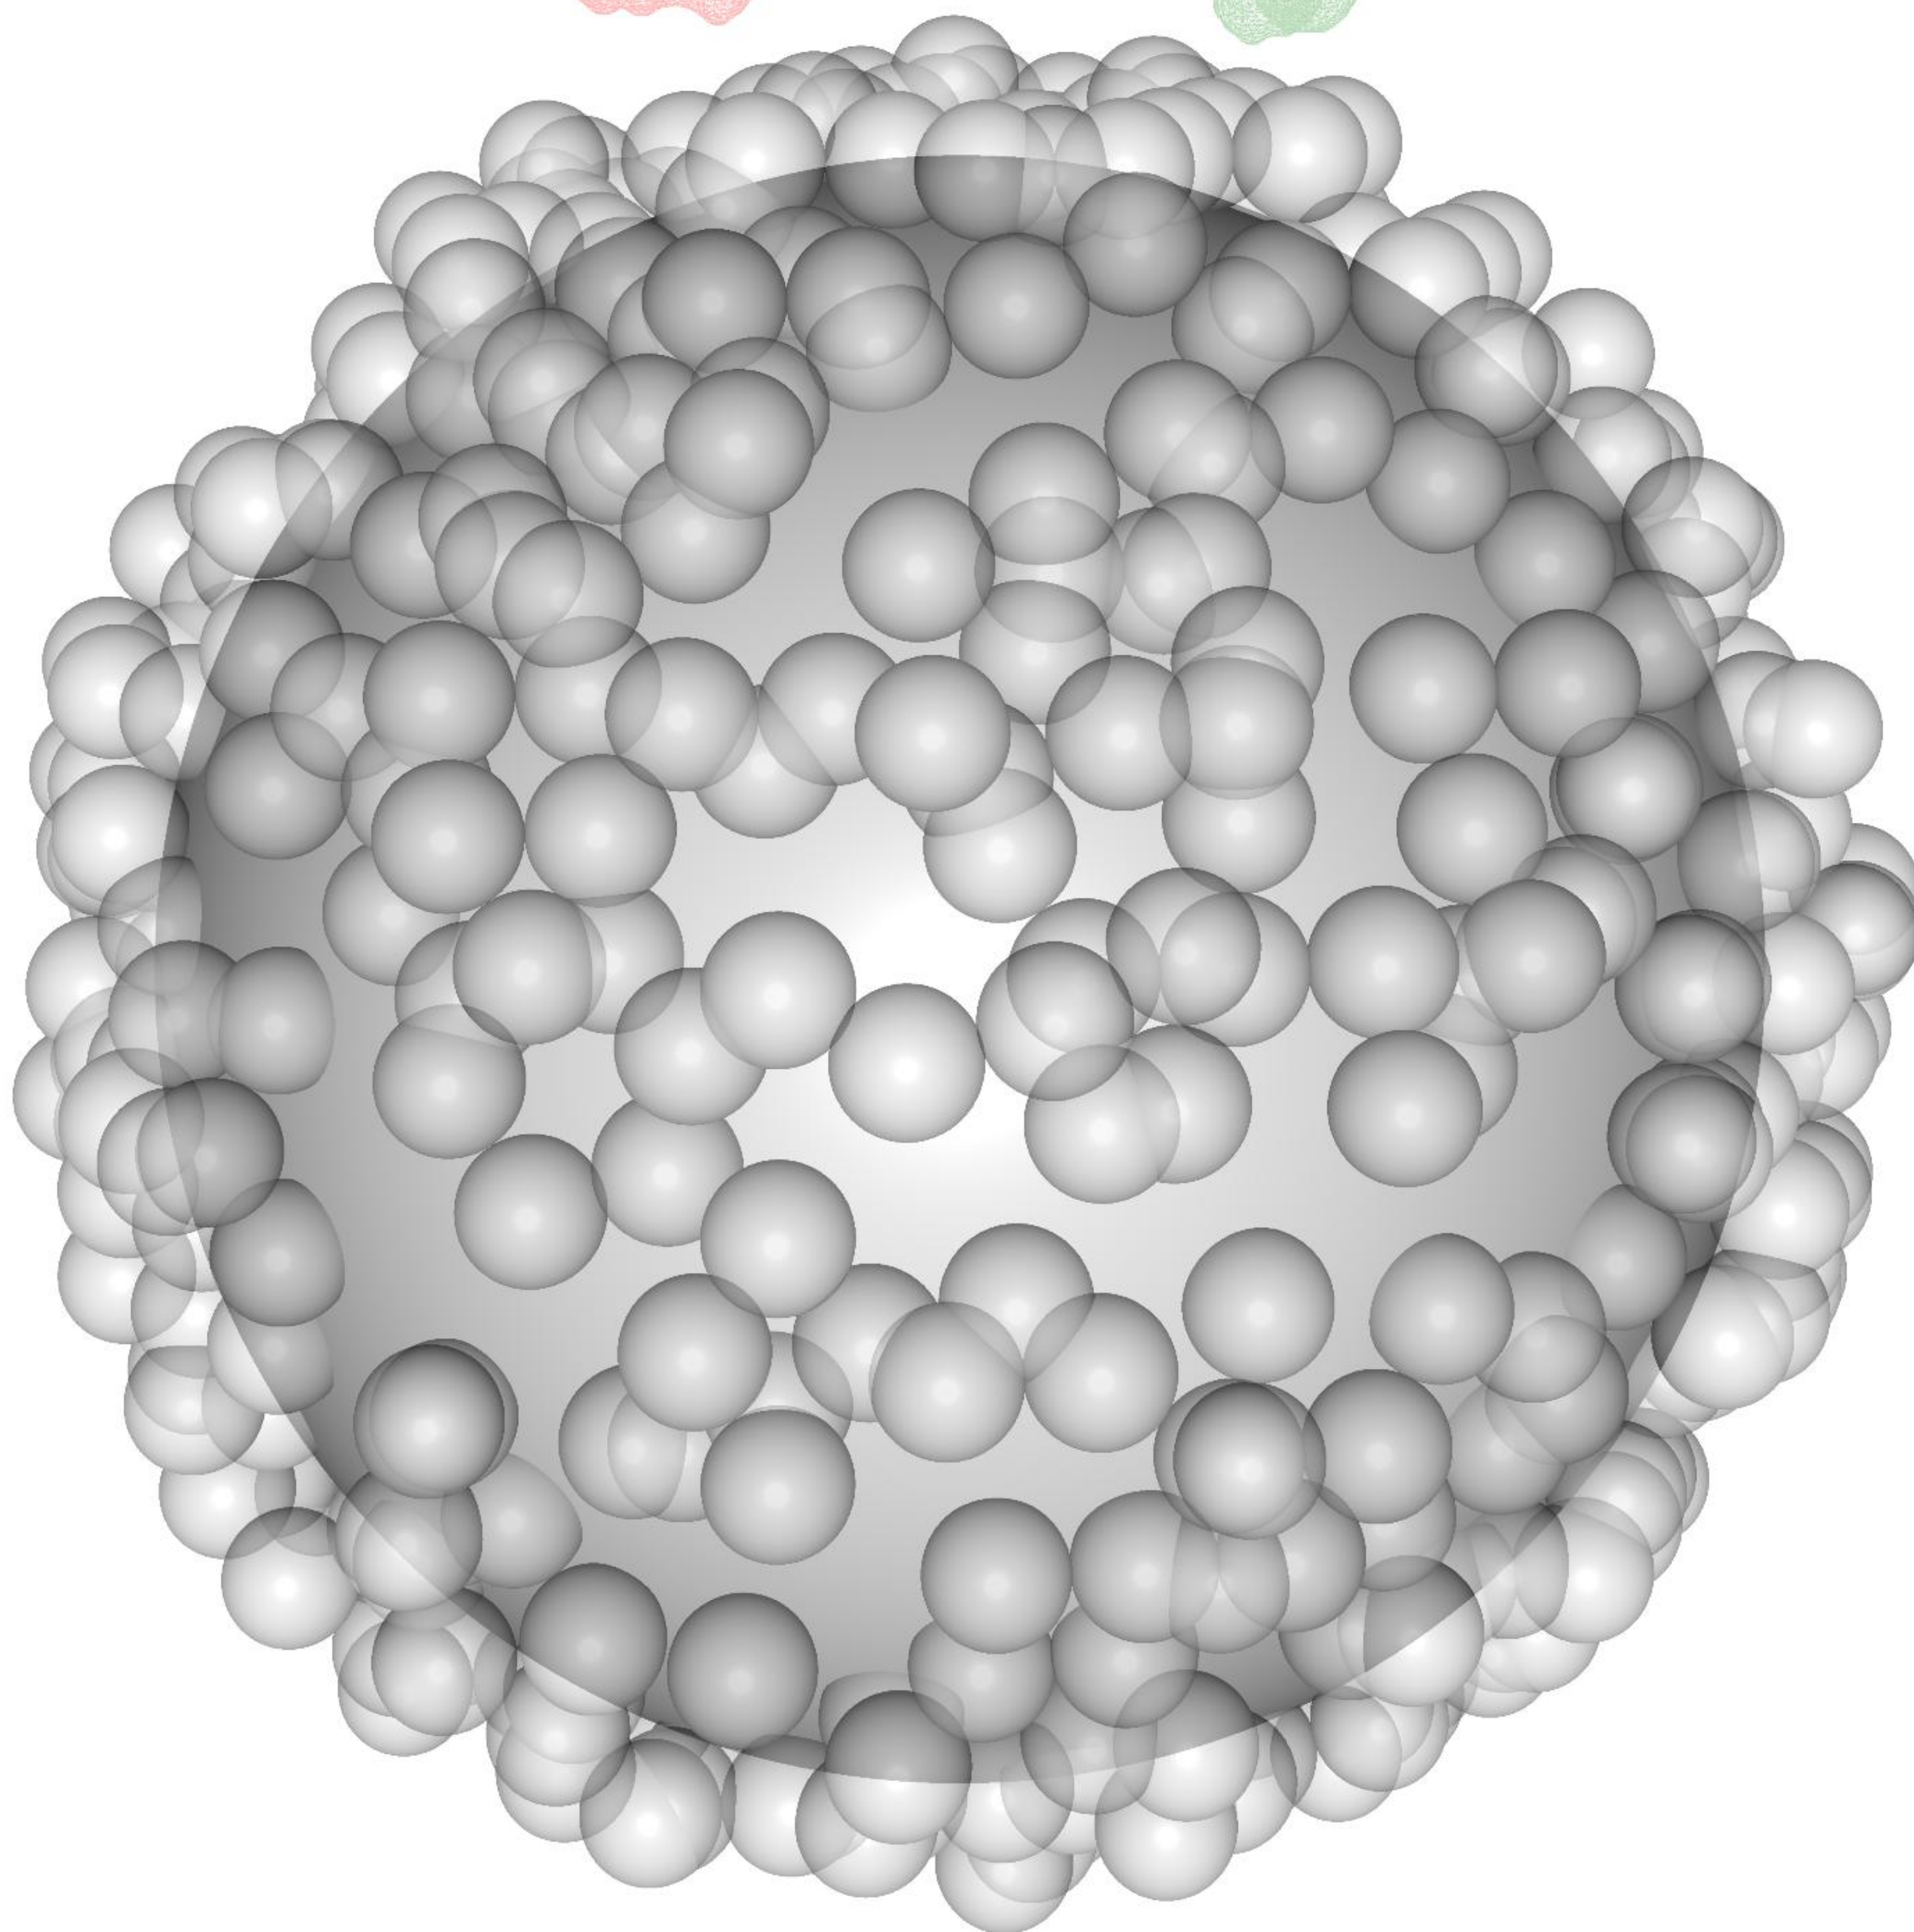

Supplement: d5en00784d1.zip [file psps_5nm_2a73_CG.pdf › fig_supp/complex/psps_5nm_2a73_CG.pdf]

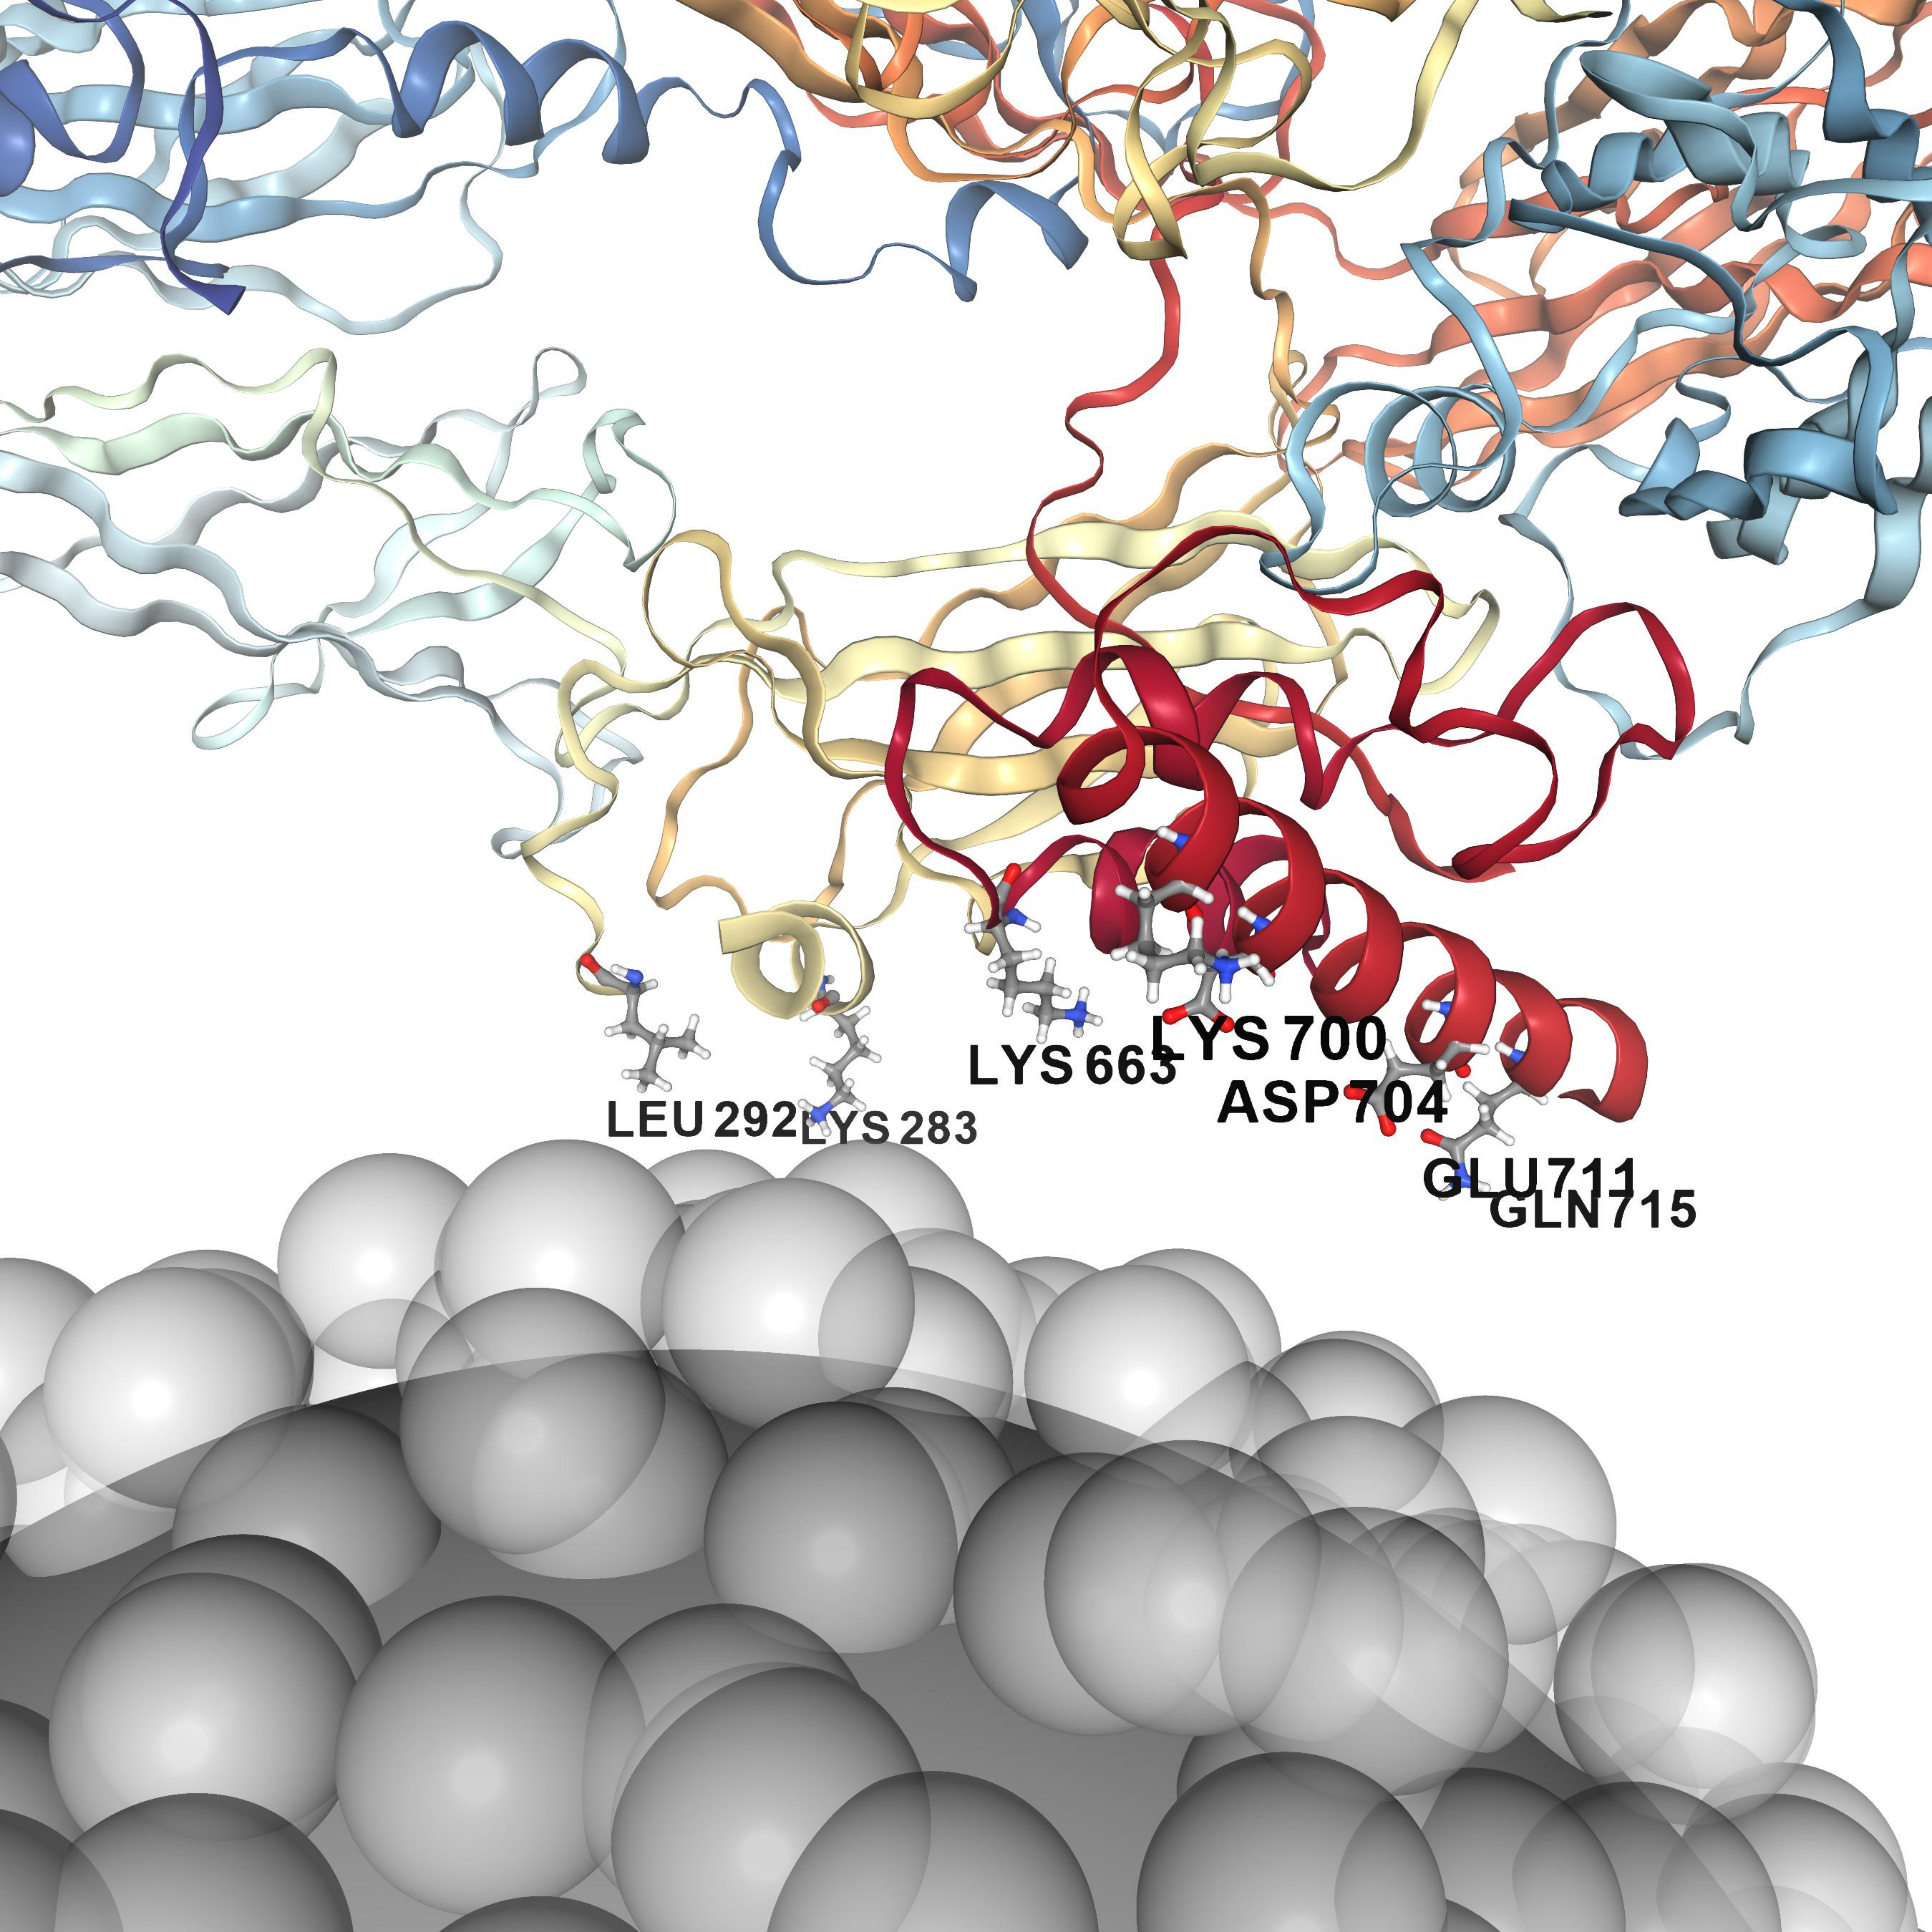

Supplement: d5en00784d1.zip [file psps_5nm_2a73_snap.pdf › fig_supp/complex/psps_5nm_2a73_snap.pdf]

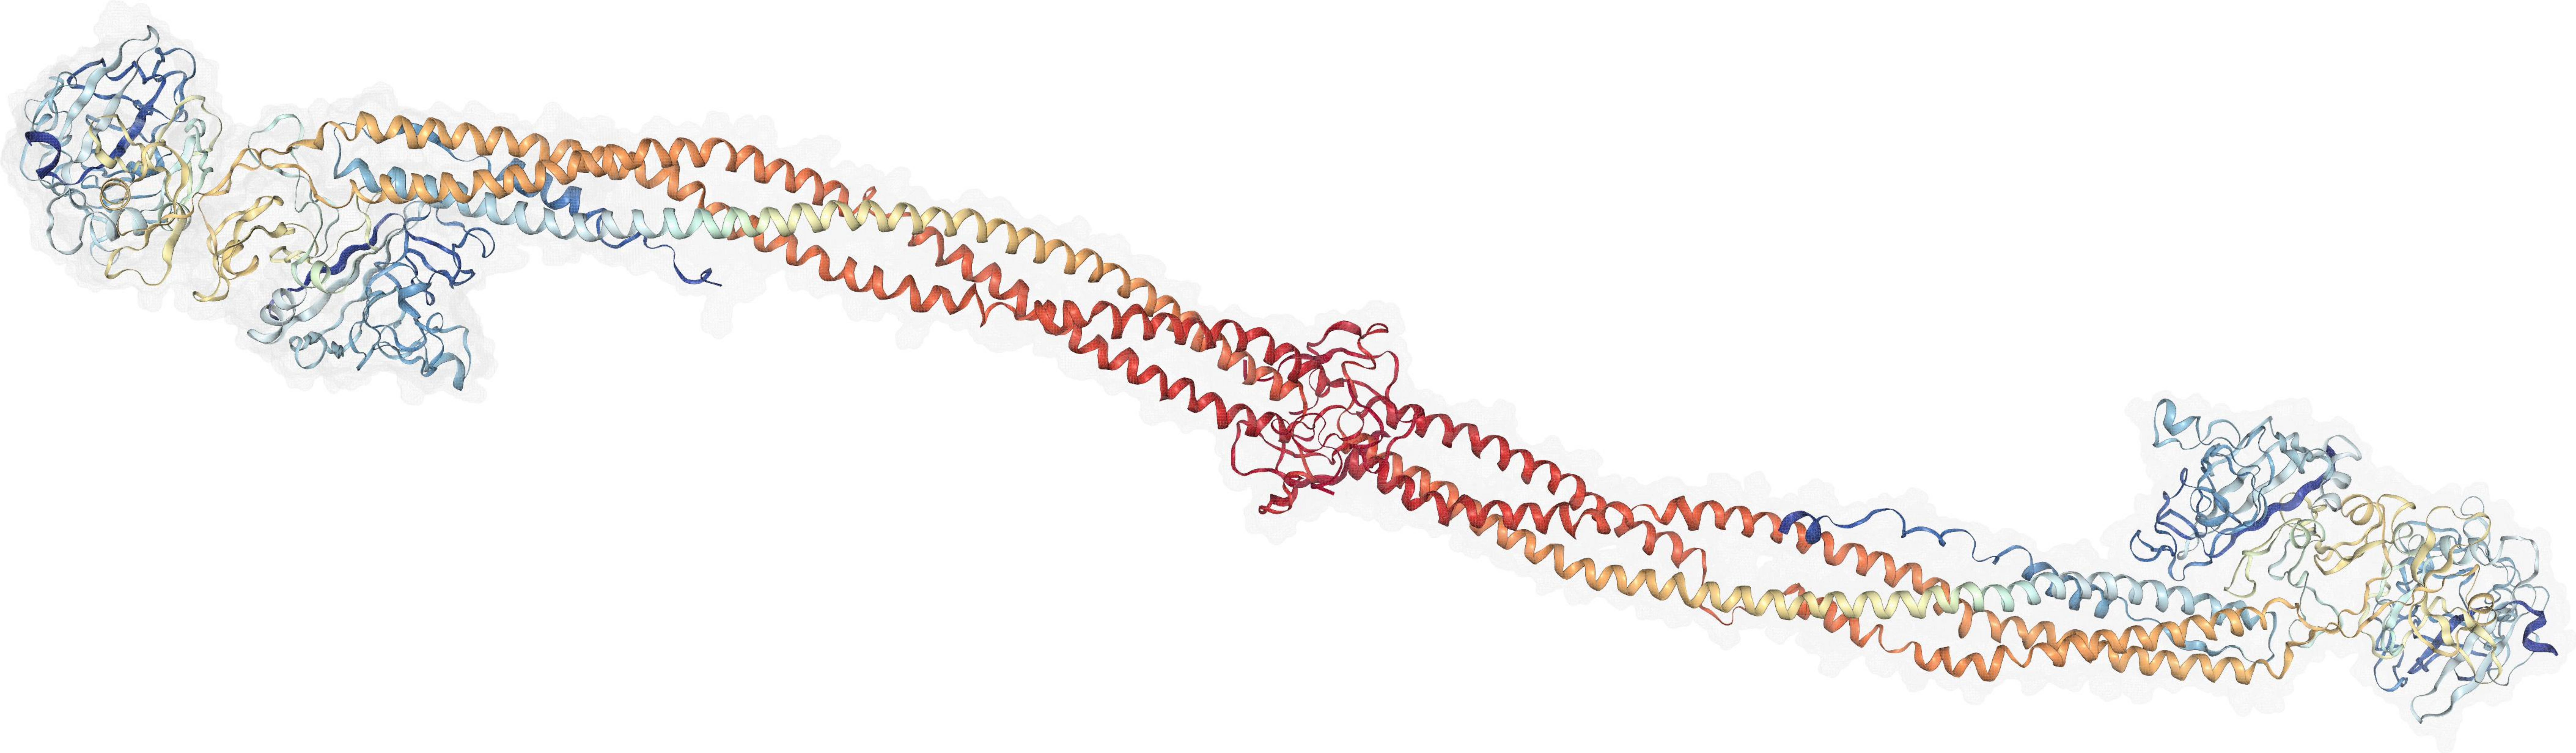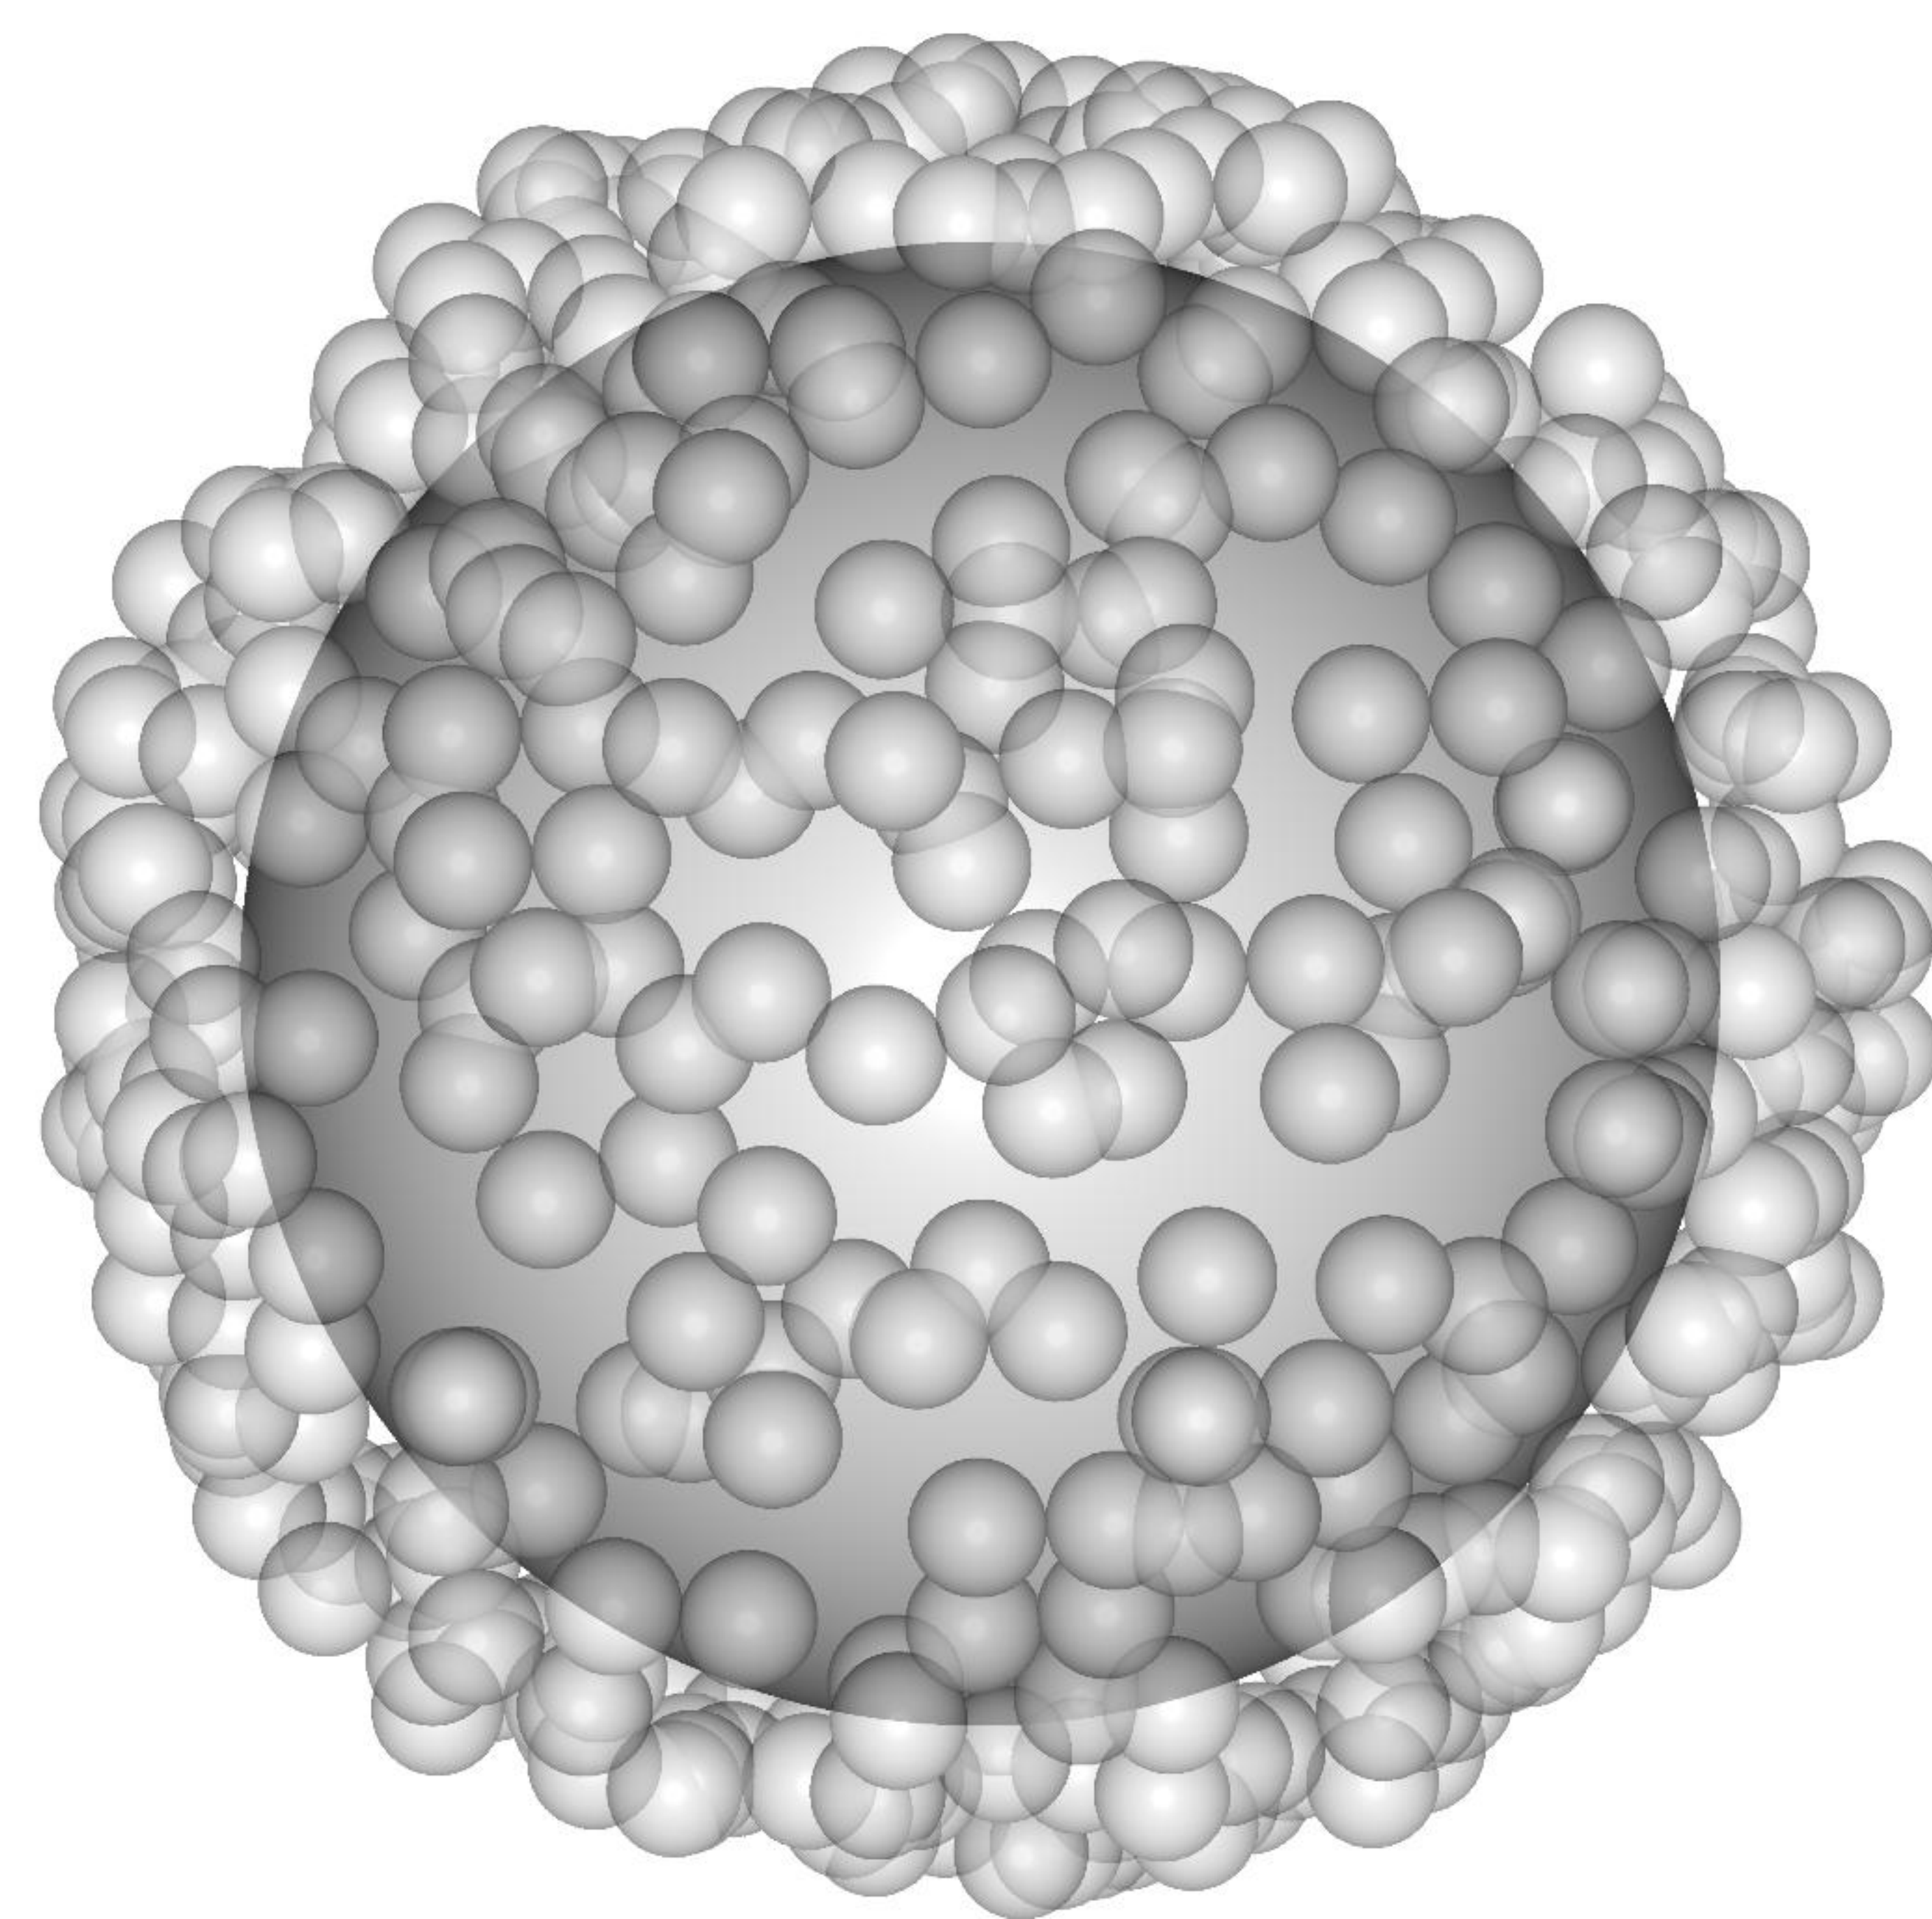

Supplement: d5en00784d1.zip [file psps_5nm_3ghg_CG.pdf › fig_supp/complex/psps_5nm_3ghg_CG.pdf]

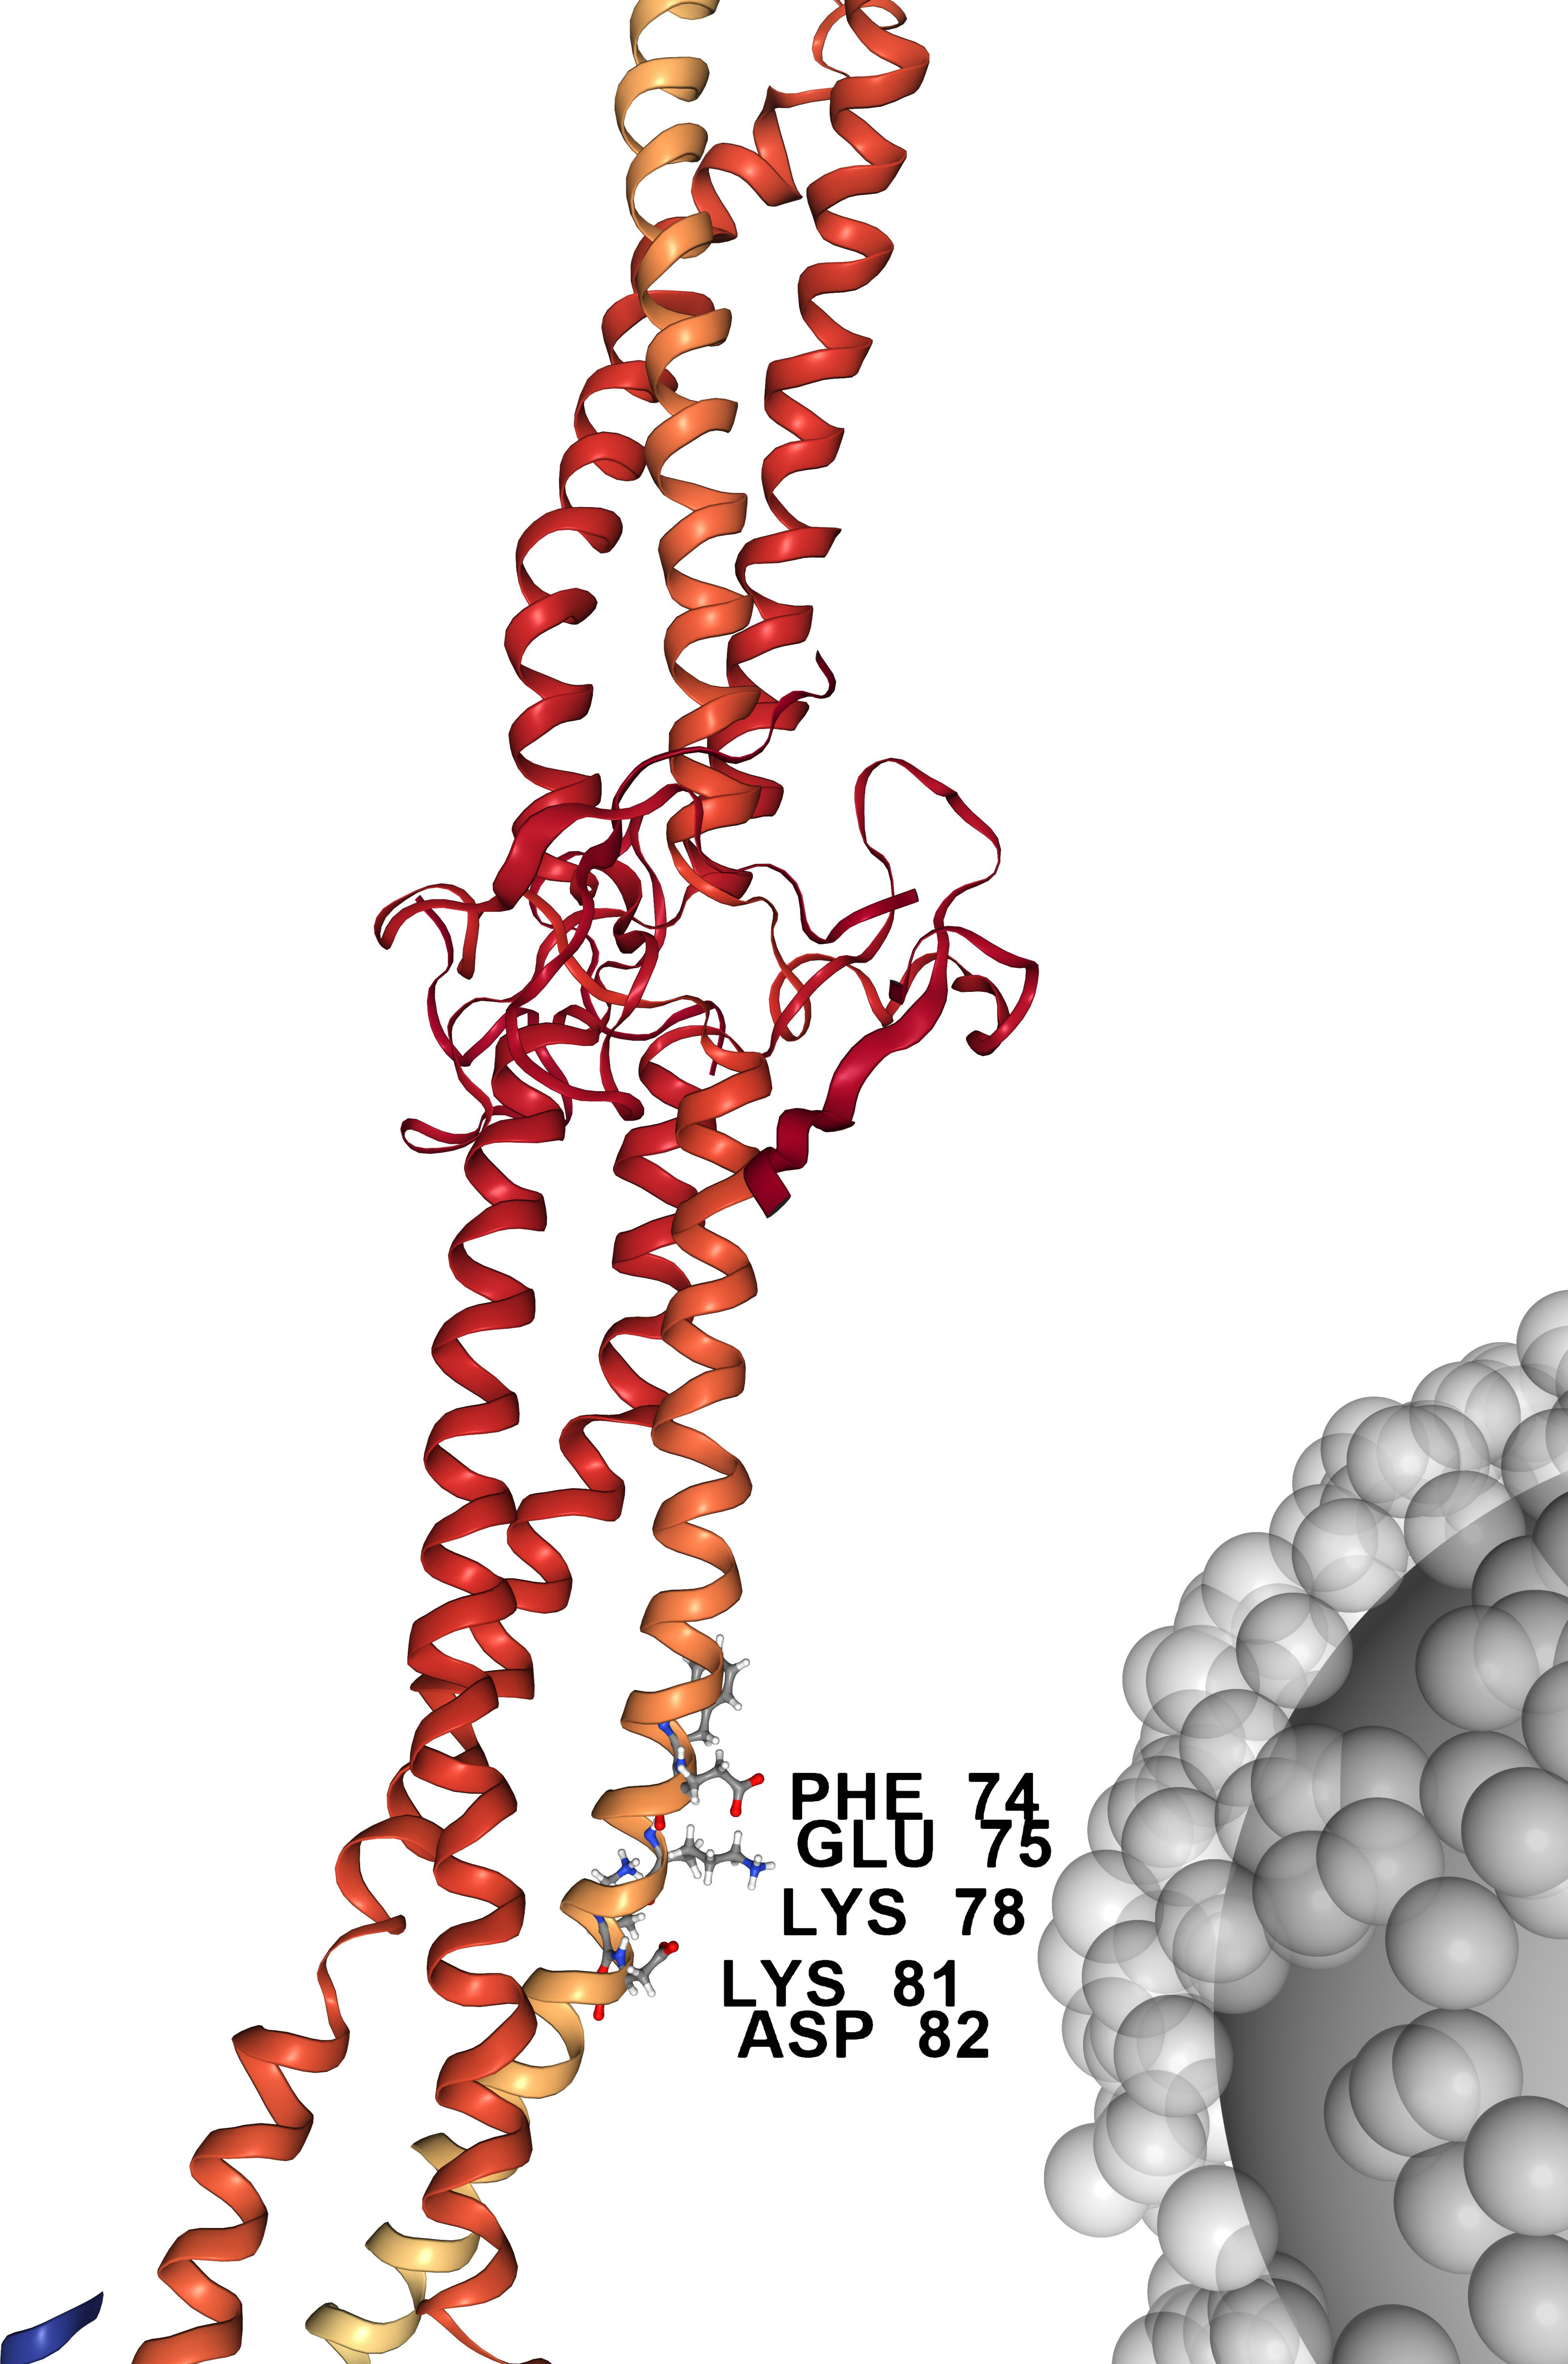

Supplement: d5en00784d1.zip [file psps_5nm_3ghg_snap.pdf › fig_supp/complex/psps_5nm_3ghg_snap.pdf]

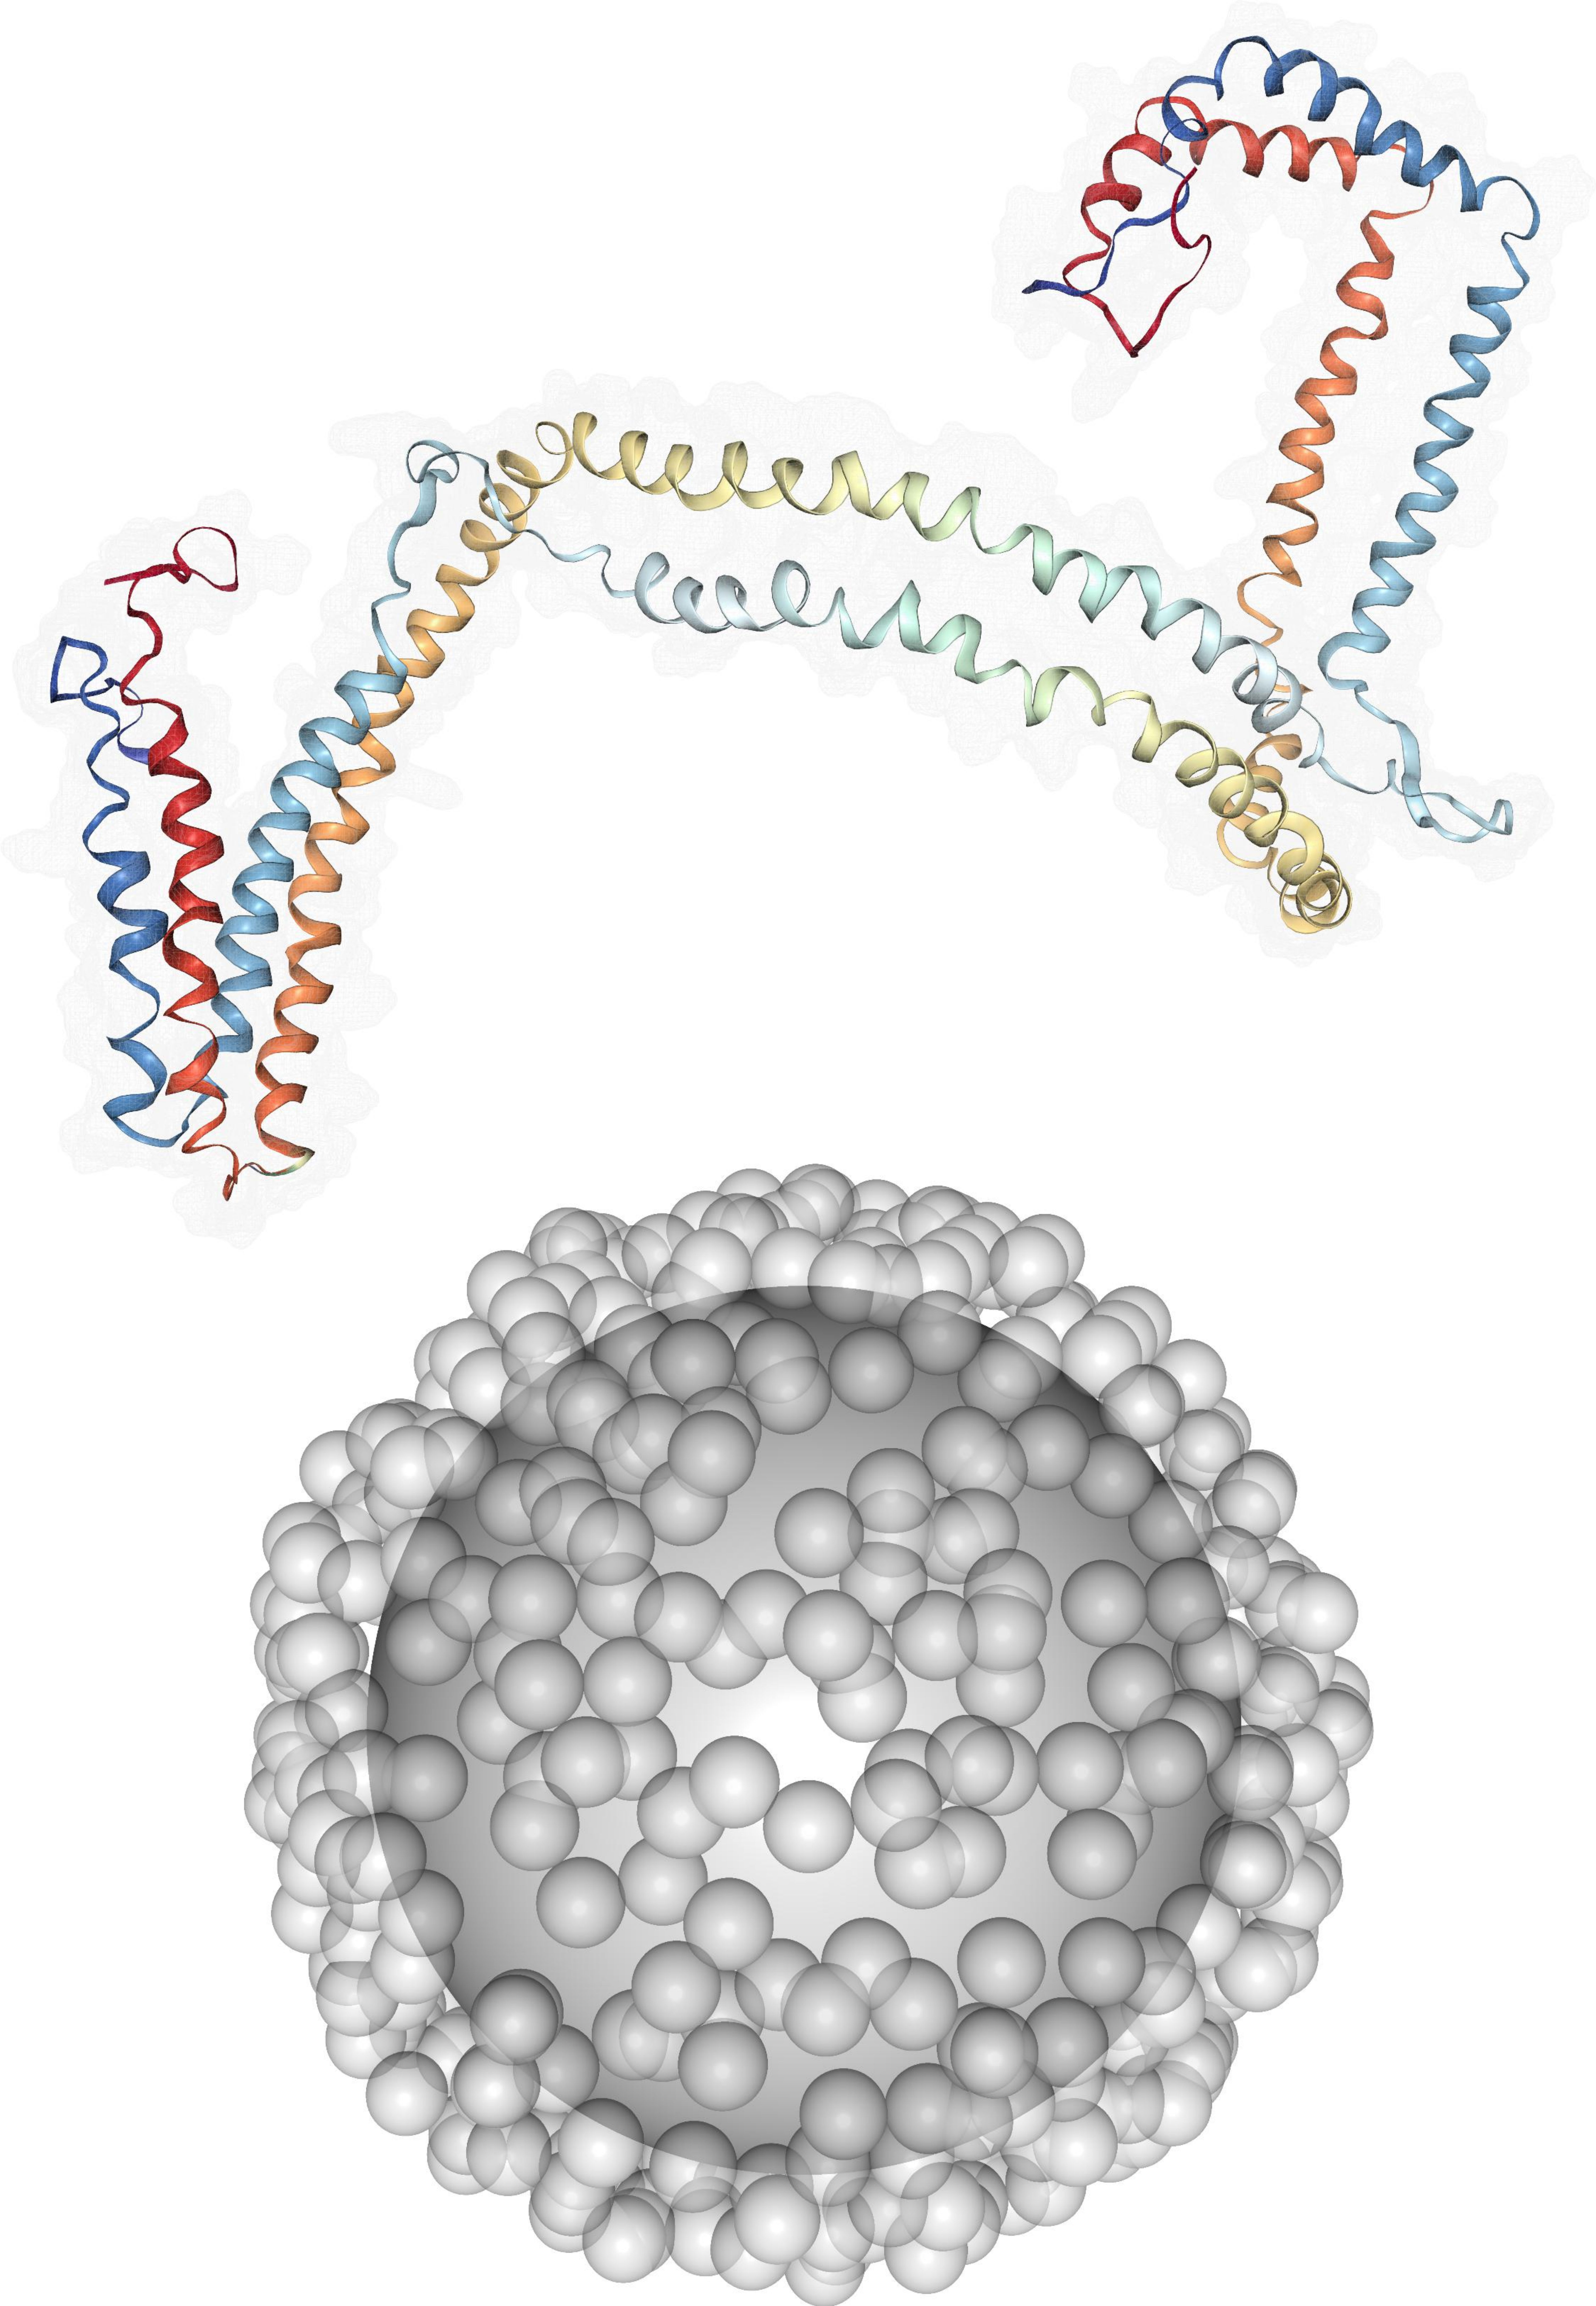

Supplement: d5en00784d1.zip [file psps_5nm_3k2s_CG.pdf › fig_supp/complex/psps_5nm_3k2s_CG.pdf]

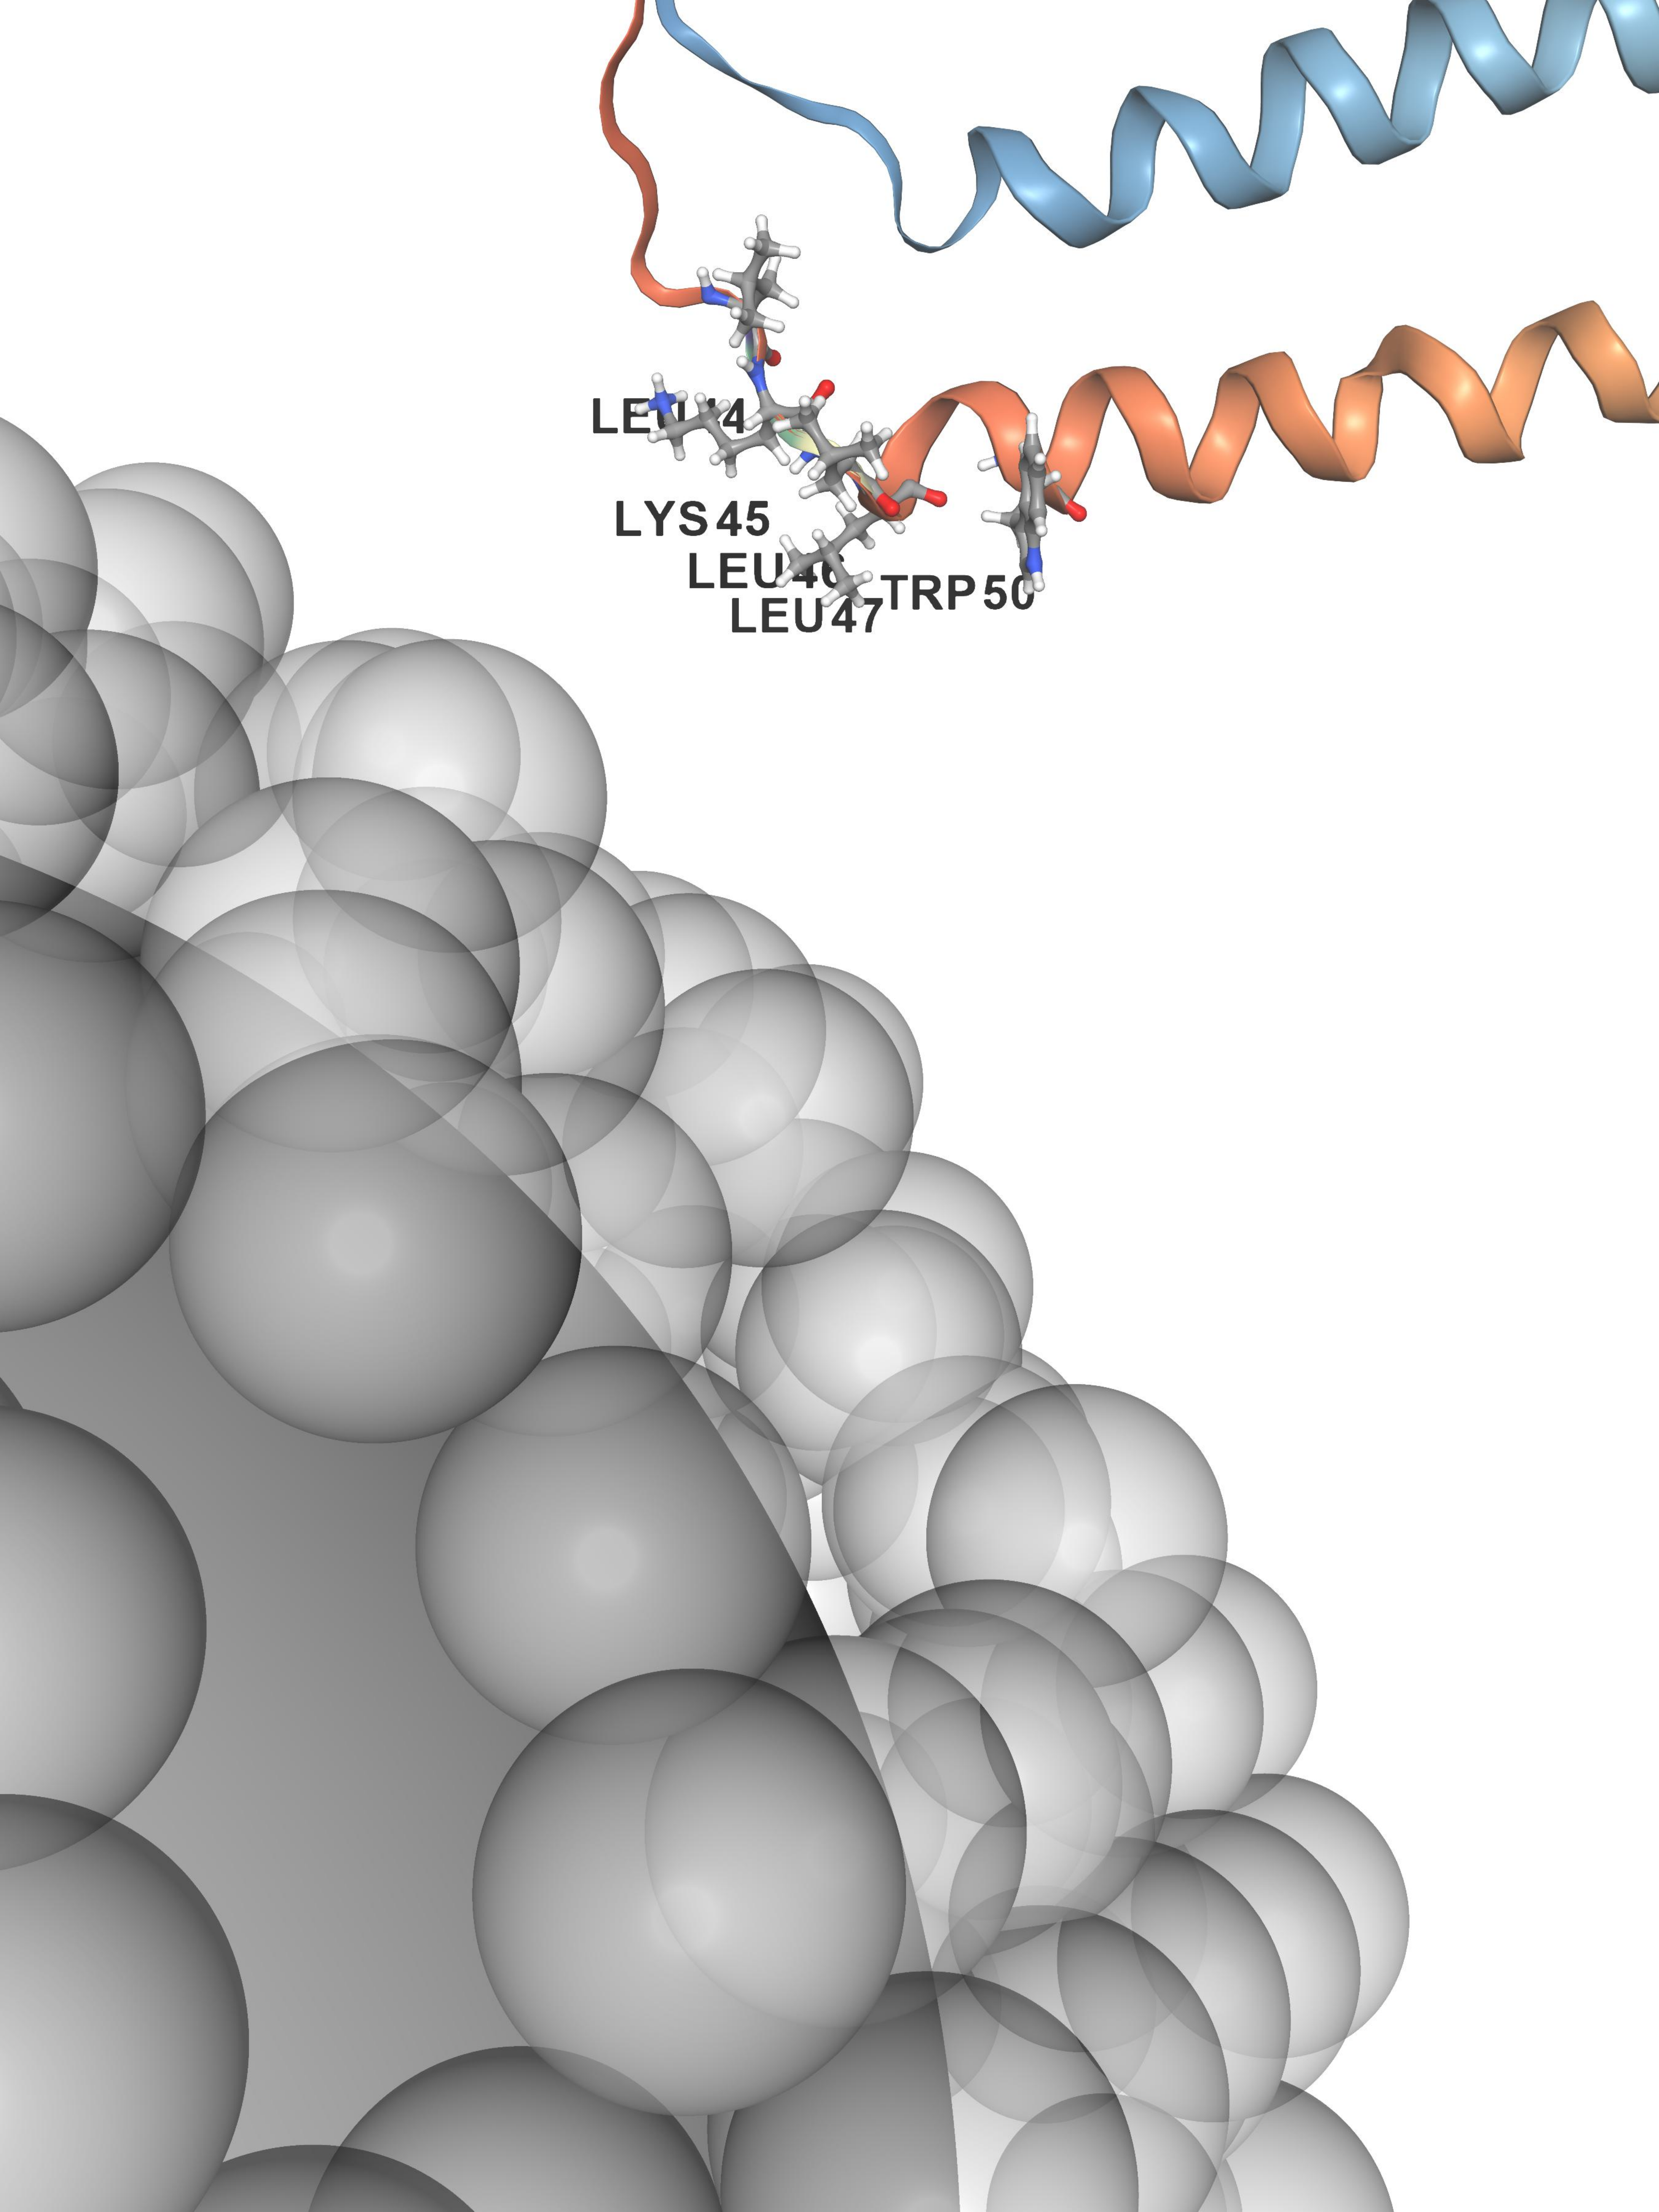

Supplement: d5en00784d1.zip [file psps_5nm_3k2s_snap.pdf › fig_supp/complex/psps_5nm_3k2s_snap.pdf]

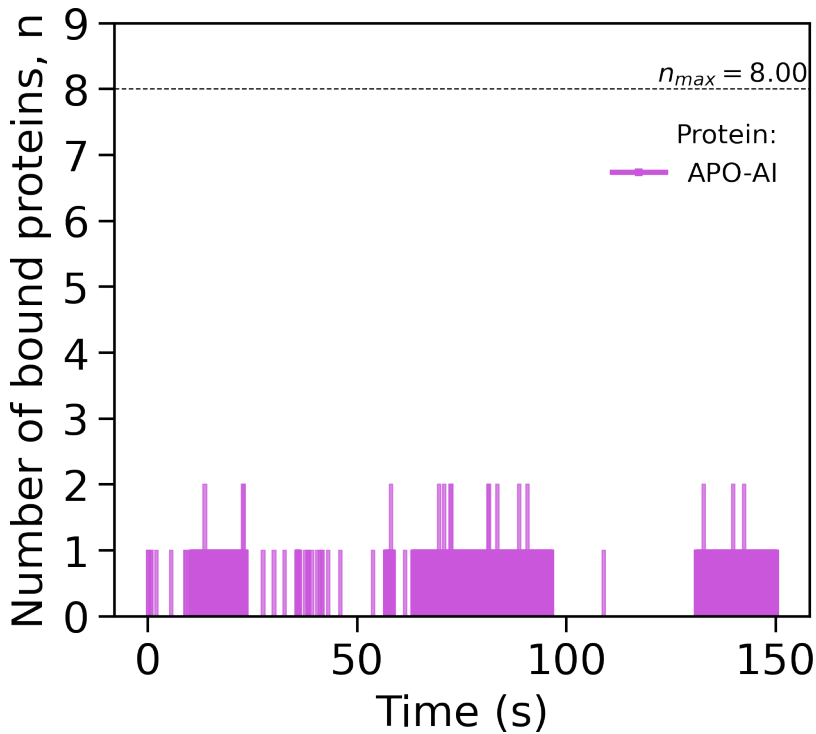

Supplement: d5en00784d1.zip [file number_kmc_ps_cooh_apo-ai.pdf › fig_supp/kmc/number_kmc_ps_cooh_apo-ai.pdf]

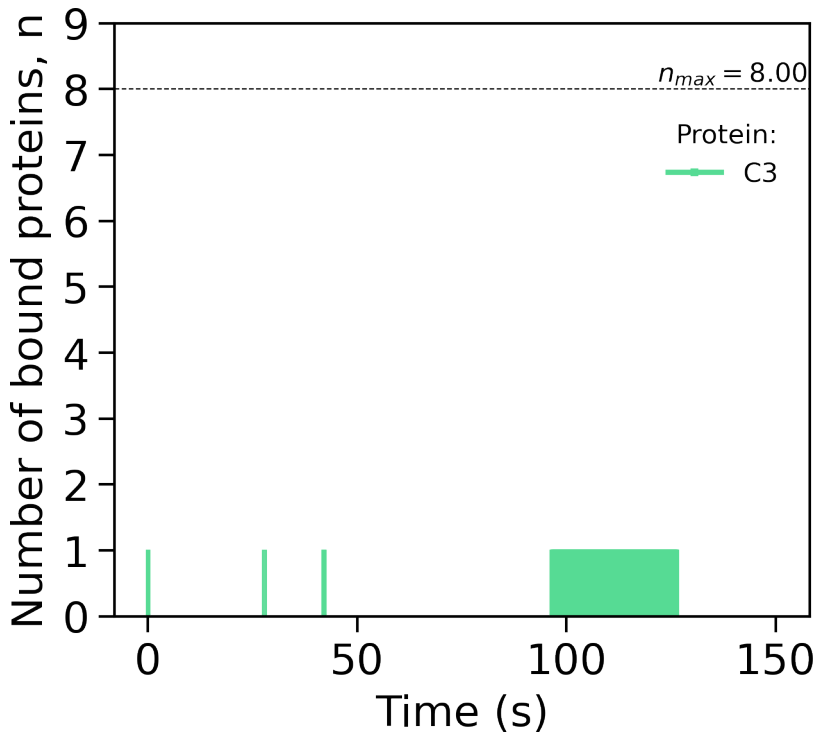

Supplement: d5en00784d1.zip [file number_kmc_ps_cooh_c3.pdf › fig_supp/kmc/number_kmc_ps_cooh_c3.pdf]

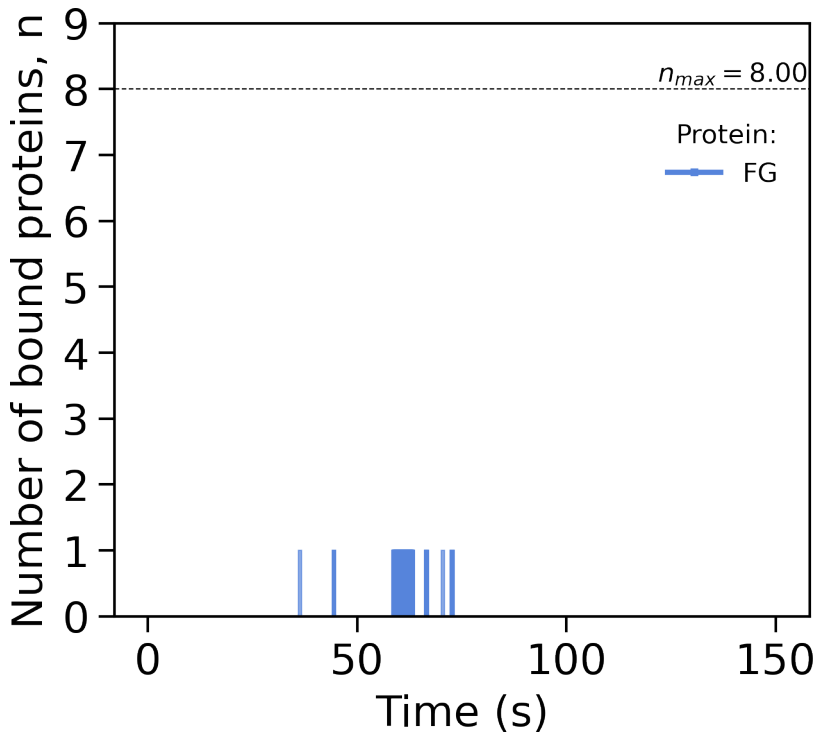

Supplement: d5en00784d1.zip [file number_kmc_ps_cooh_fg.pdf › fig_supp/kmc/number_kmc_ps_cooh_fg.pdf]

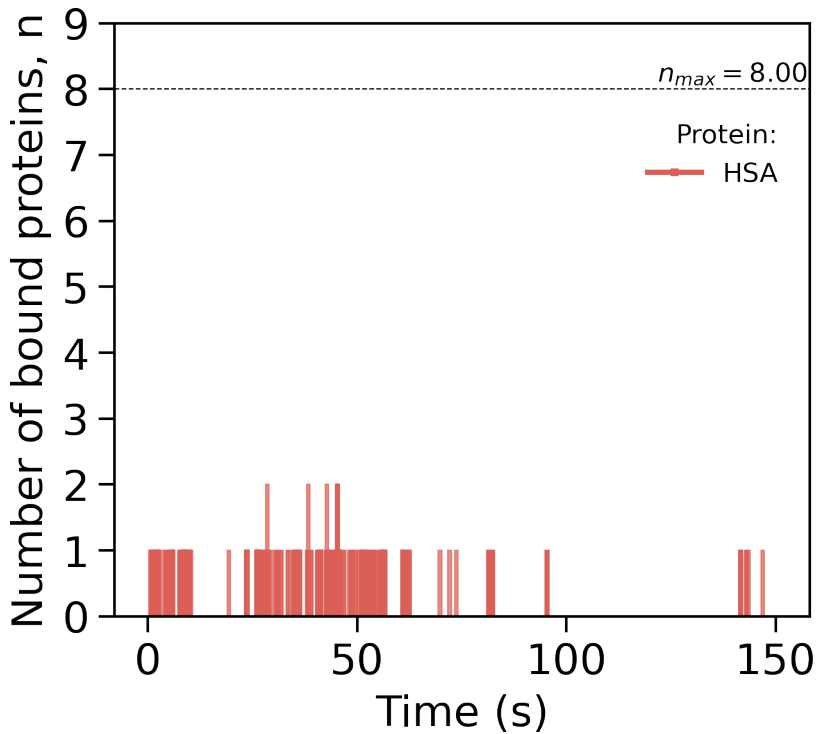

Supplement: d5en00784d1.zip [file number_kmc_ps_cooh_hsa.pdf › fig_supp/kmc/number_kmc_ps_cooh_hsa.pdf]

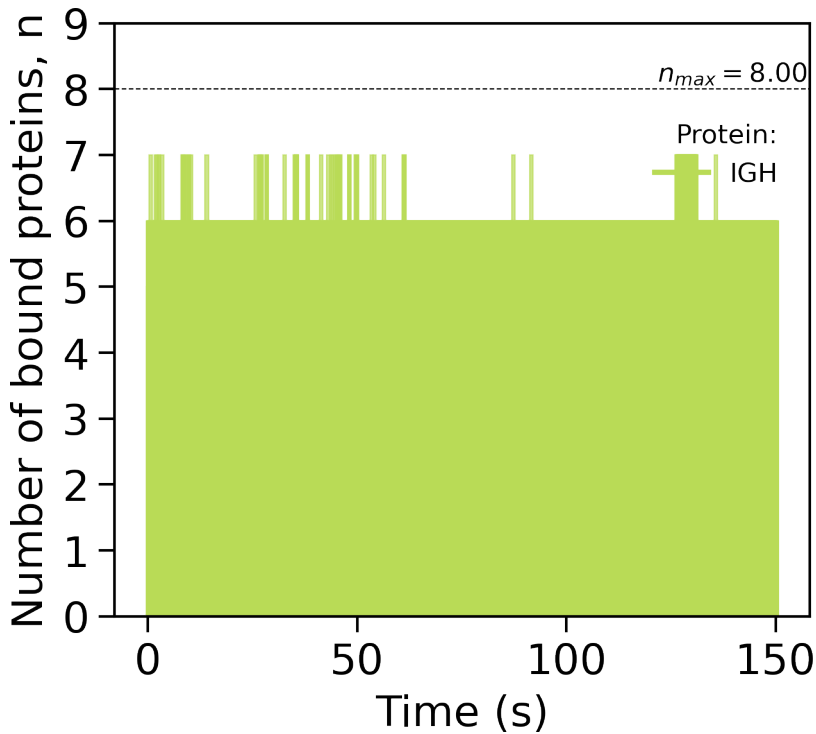

Supplement: d5en00784d1.zip [file number_kmc_ps_cooh_igh.pdf › fig_supp/kmc/number_kmc_ps_cooh_igh.pdf]

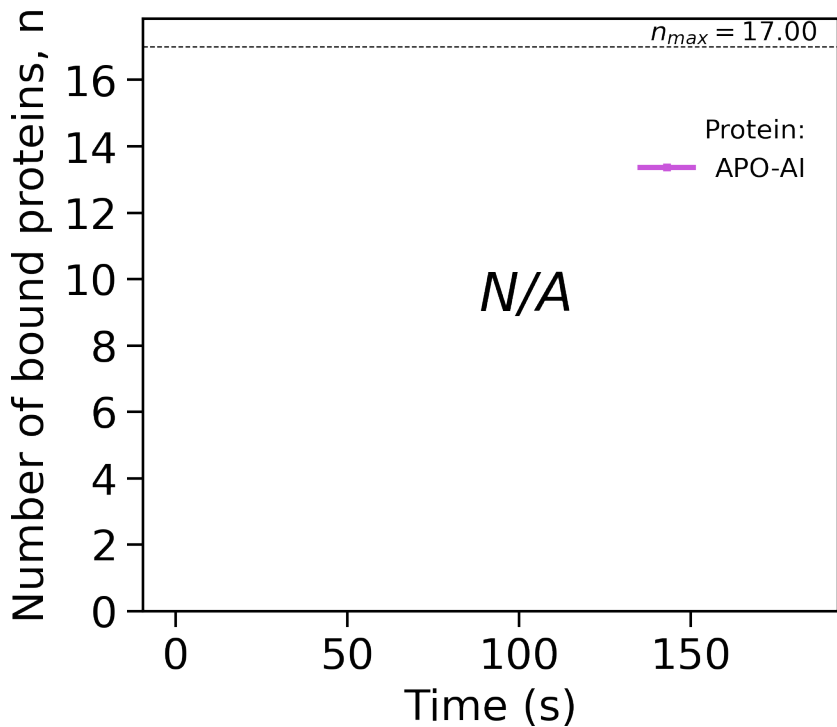

Supplement: d5en00784d1.zip [file number_kmc_ps_nh2_apo-ai.pdf › fig_supp/kmc/number_kmc_ps_nh2_apo-ai.pdf]

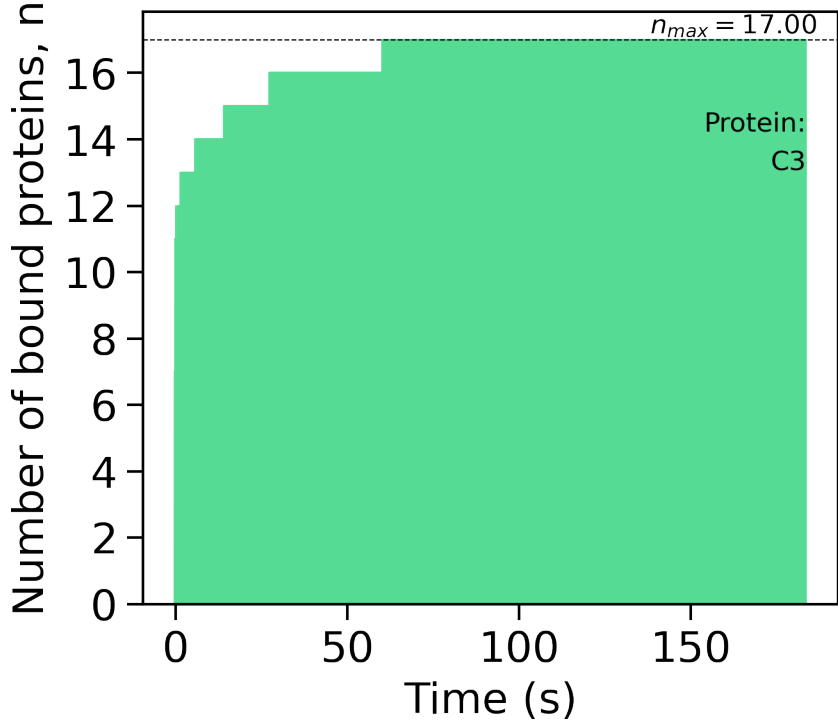

Supplement: d5en00784d1.zip [file number_kmc_ps_nh2_c3.pdf › fig_supp/kmc/number_kmc_ps_nh2_c3.pdf]

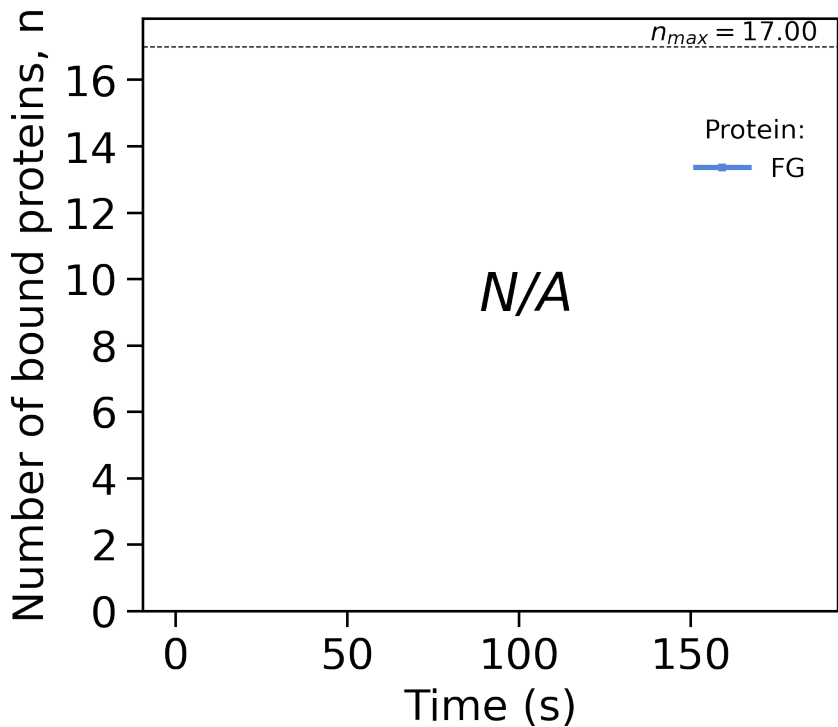

Supplement: d5en00784d1.zip [file number_kmc_ps_nh2_fg.pdf › fig_supp/kmc/number_kmc_ps_nh2_fg.pdf]

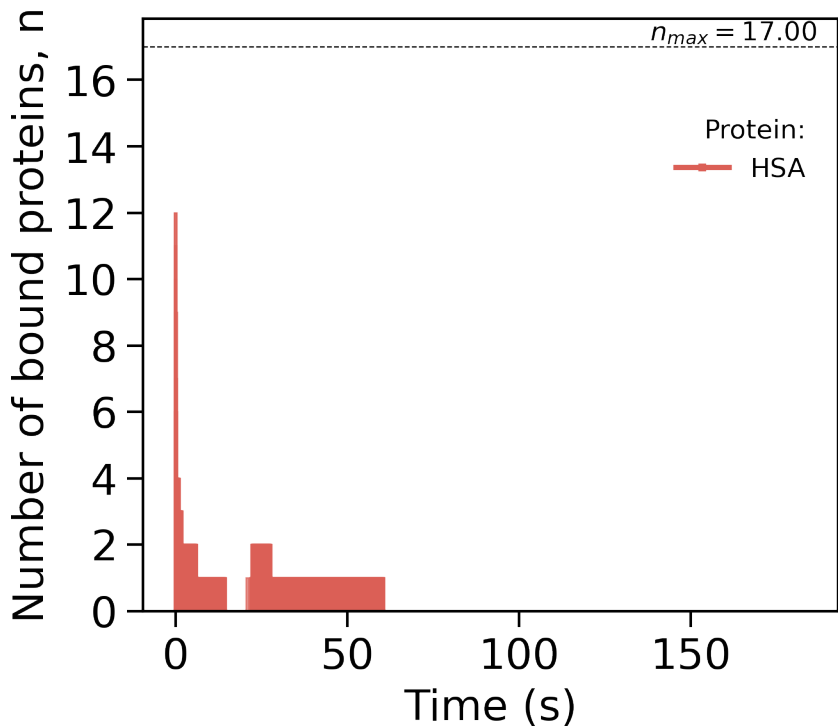

Supplement: d5en00784d1.zip [file number_kmc_ps_nh2_hsa.pdf › fig_supp/kmc/number_kmc_ps_nh2_hsa.pdf]

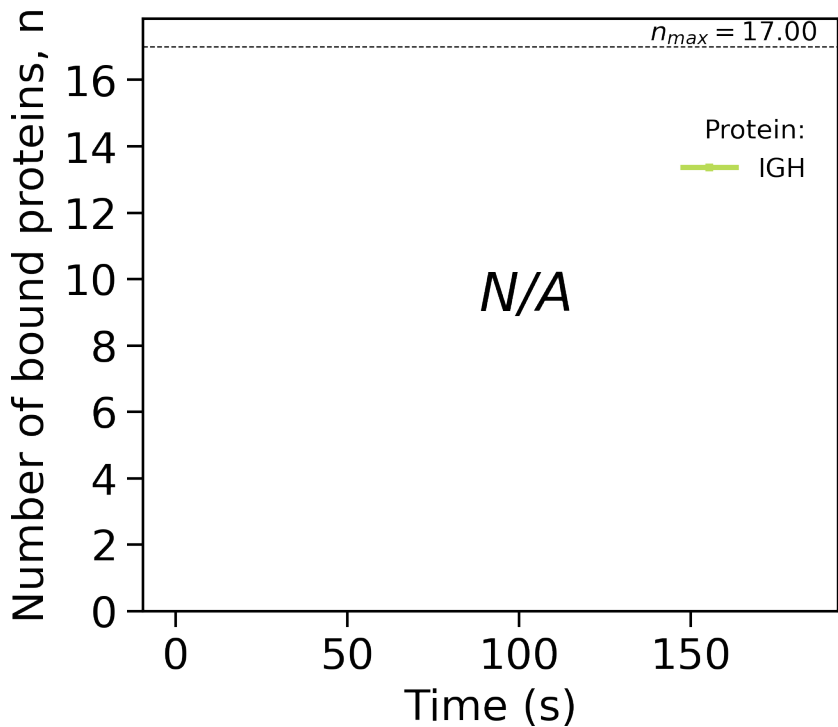

Supplement: d5en00784d1.zip [file number_kmc_ps_nh2_igh.pdf › fig_supp/kmc/number_kmc_ps_nh2_igh.pdf]

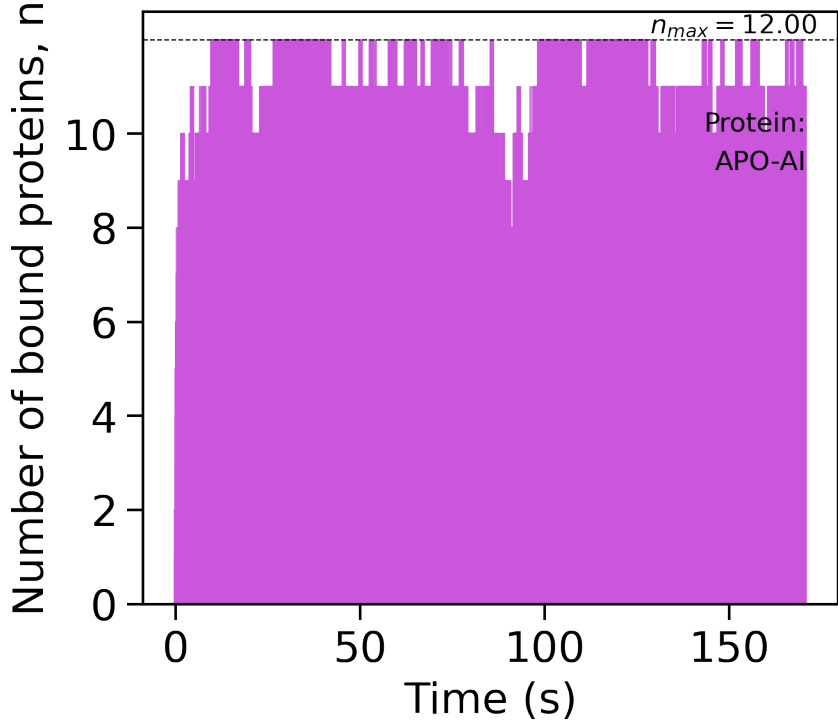

Supplement: d5en00784d1.zip [file number_kmc_ps_ps_apo-ai.pdf › fig_supp/kmc/number_kmc_ps_ps_apo-ai.pdf]

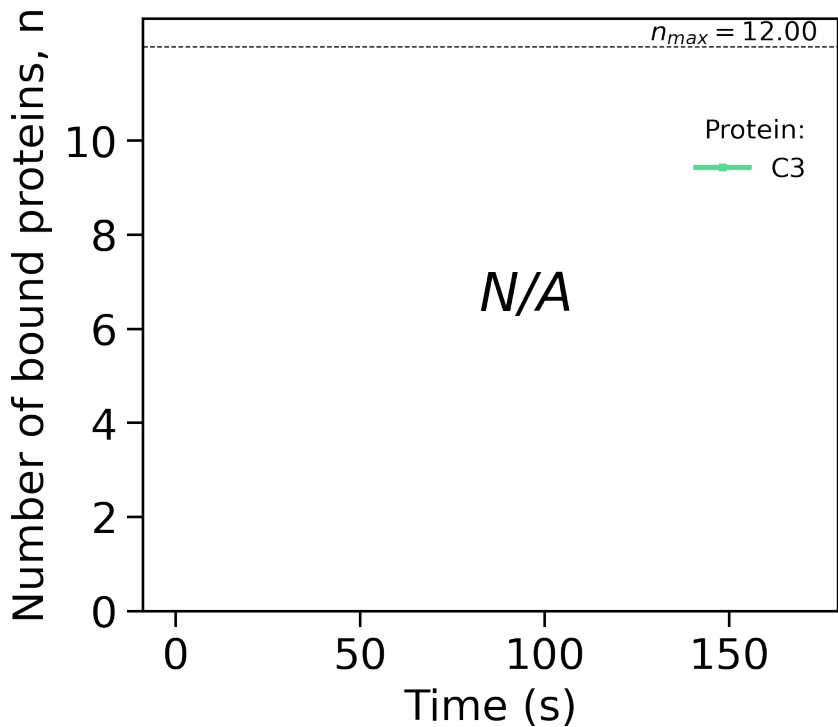

Supplement: d5en00784d1.zip [file number_kmc_ps_ps_c3.pdf › fig_supp/kmc/number_kmc_ps_ps_c3.pdf]

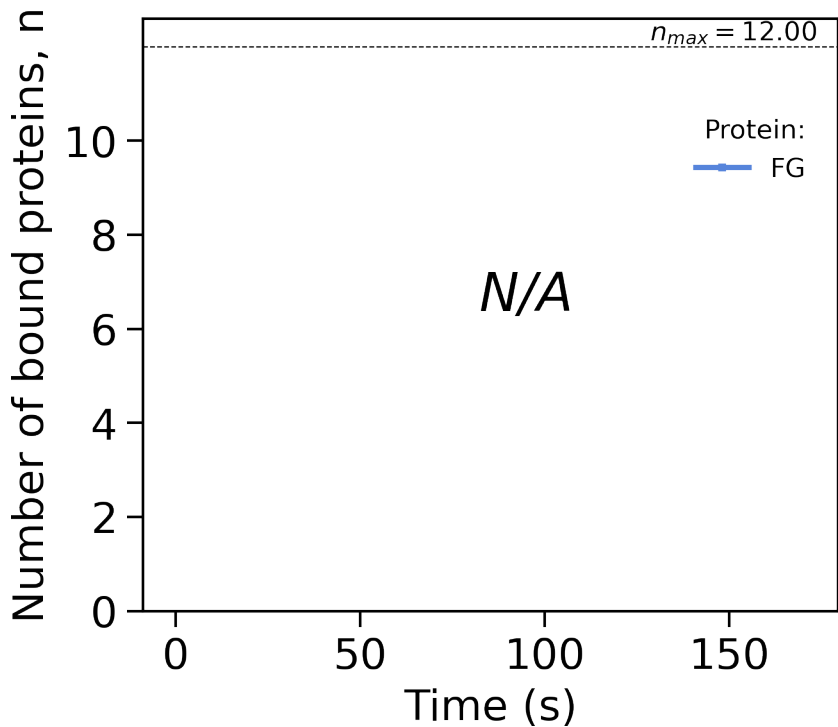

Supplement: d5en00784d1.zip [file number_kmc_ps_ps_fg.pdf › fig_supp/kmc/number_kmc_ps_ps_fg.pdf]

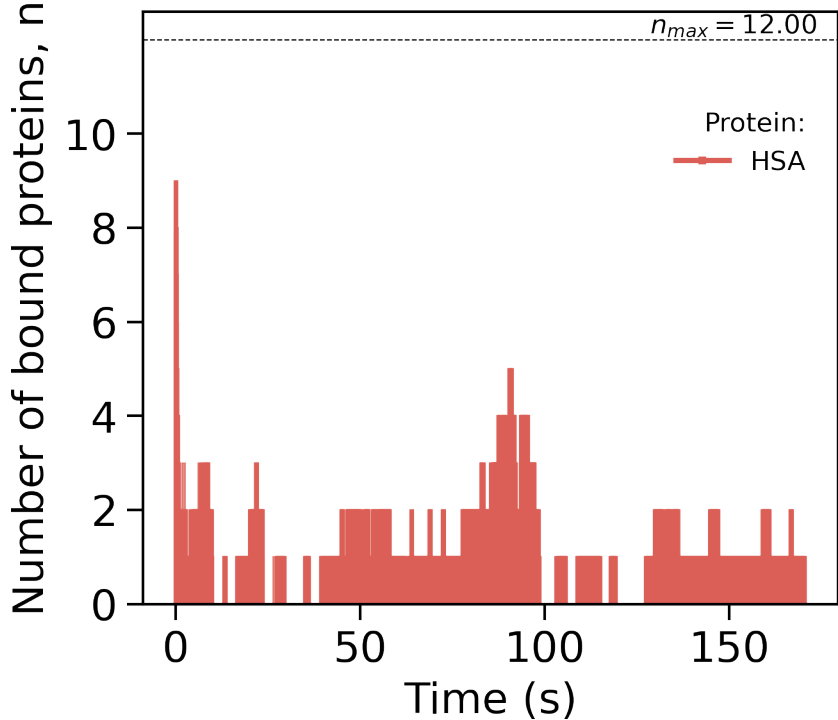

Supplement: d5en00784d1.zip [file number_kmc_ps_ps_hsa.pdf › fig_supp/kmc/number_kmc_ps_ps_hsa.pdf]

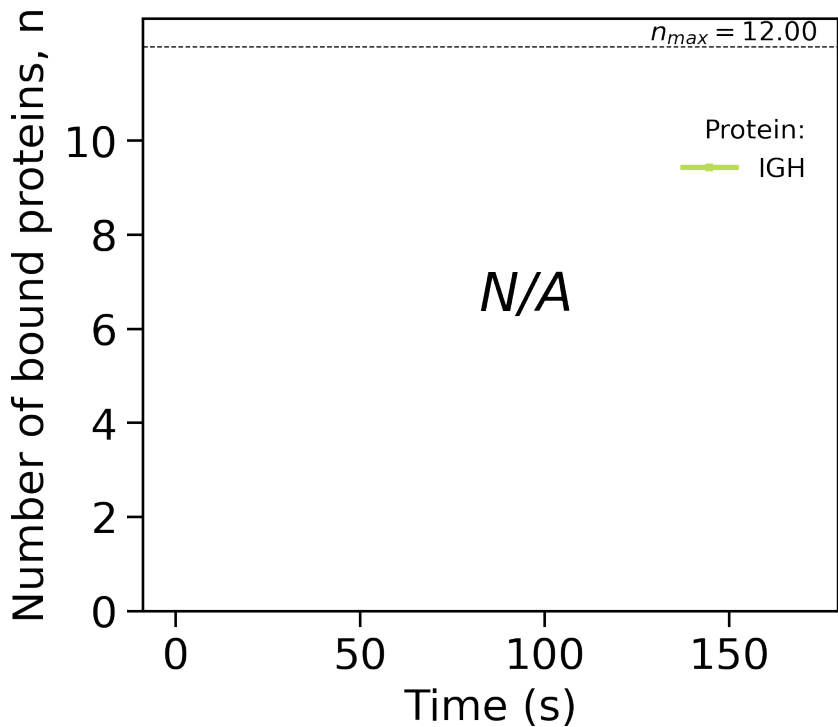

Supplement: d5en00784d1.zip [file number_kmc_ps_ps_igh.pdf › fig_supp/kmc/number_kmc_ps_ps_igh.pdf]
